# Supplementary material for: Synthesis and optical resolution of 4,5-diaminohomoadamantane: a promising scaffold for chiral ligands and bioactive compounds
Source: publisher site journal article supplement (doi:10.3762/bjoc.22.80), 2026-07-01
Supplement: Additional file 1 [file 1860-5397-22-80-S1.pdf]

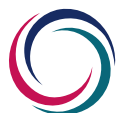

## Supporting Information

for

### **Synthesis and optical resolution of 4,5-diaminohomoadamantane: a promising scaffold for chiral ligands and bioactive compounds**

Polina A. Man'kova, Vadim A. Shiryayev, Olga S. Podlipnova, Marat M. Khisyamov, Dmitry S. Nikerov, Alexander N. Reznikov and Yuri N. Klimochkin

*Beilstein J. Org. Chem.* **2026**, 22, 1013–1022. [doi:10.3762/bjoc.22.80](https://doi.org/10.3762/bjoc.22.80)

## Experimental section

## Table of contents

|                                                                                                                                                                                |     |
|--------------------------------------------------------------------------------------------------------------------------------------------------------------------------------|-----|
| 1. General information .....                                                                                                                                                   | S2  |
| 2. Synthetic procedures .....                                                                                                                                                  | S2  |
| 3. <sup>1</sup> H NMR and <sup>13</sup> C NMR spectra for synthesized compounds .....                                                                                          | S15 |
| 3.1. NMR spectra of 5-chlorotricyclo[4.3.1.1 <sup>3,8</sup> ]undecane-4-one oxime ( <b>3</b> ) .....                                                                           | S15 |
| 3.2. NMR spectra of 5-azidotricyclo[4.3.1.1 <sup>3,8</sup> ]undecane-4-one oxime ( <b>4</b> ) .....                                                                            | S17 |
| 3.3. NMR spectra of 5-(benzylamino)tricyclo[4.3.1.1 <sup>3,8</sup> ]undecan-4-one oxime ( <b>5</b> ) .....                                                                     | S19 |
| 3.4. NMR spectra of tricyclo[4.3.1.1 <sup>3,8</sup> ]undecane-4-amine hydrochloride ( <b>6</b> ) .....                                                                         | S21 |
| 3.5. NMR spectra of 5-azidotricyclo[4.3.1.1 <sup>3,8</sup> ]undecan-4-amine hydrochloride ( <b>7</b> ) .....                                                                   | S23 |
| 3.6. NMR spectra of <i>trans/cis</i> -4,5-diaminohomoadamantane dihydrochloride <b>8a,b</b> .....                                                                              | S25 |
| 3.7. NMR spectra of <i>trans</i> -4,5-diaminohomoadamantane dihydrochloride ( <b>8a</b> ) .....                                                                                | S27 |
| 3.8. NMR spectra of <i>tert</i> -butyl 5-azatetracyclo[5.3.1.1 <sup>3,9</sup> .0 <sup>4,6</sup> ]dodecane-5-carboxylate ( <b>10</b> ) .....                                    | S29 |
| 3.9. NMR spectra of <i>cis</i> -5- <i>p</i> -tosyl-5-azatetracyclo[5.3.1.1 <sup>3,9</sup> .0 <sup>4,6</sup> ]dodecane ( <b>11</b> ) .....                                      | S31 |
| 3.10. NMR spectra of <i>cis</i> -5-((trifluoromethyl)sulfonyl)-5-azatetracyclo[5.3.1.1 <sup>3,9</sup> .0 <sup>4,6</sup> ]dodecane ( <b>12</b> ) .....                          | S33 |
| 3.11. NMR spectra of <i>trans/cis</i> - <i>N</i> -(5-azidotricyclo[4.3.1.1 <sup>3,8</sup> ]undecan-4-yl)-4-methylbenzenesulfonamide ( <b>13a,b</b> ) .....                     | S35 |
| 3.12. NMR spectra of <i>trans</i> - <i>N</i> -(5-azidotricyclo[4.3.1.1 <sup>3,8</sup> ]undecan-4-yl)-1,1,1-trifluoromethanesulfonamide ( <b>14</b> ) .....                     | S37 |
| 3.13. NMR spectra of <i>trans</i> - <i>N</i> -(5-aminotricyclo[4.3.1.1 <sup>3,8</sup> ]undecan-4-yl)-1,1,1-trifluoromethanesulfonamide ( <b>15</b> ) .....                     | S39 |
| 3.14. NMR spectra of <i>trans</i> -decahydro-4,8:6,10-dimethanocyclonona[ <i>d</i> ]imidazole-2(1 <i>H</i> )-thione ( <b>16</b> ) .....                                        | S41 |
| 3.15. NMR spectra of <i>rac</i> -2,3-diphenyl-4 <i>a</i> ,6,7,8,9,10,11,11 <i>a</i> -octahydro-5 <i>H</i> -5,9:7,11-dimethanocyclonona[ <i>b</i> ]pyrazine ( <b>17</b> ) ..... | S43 |
| 3.16. NMR spectra of (4 <i>R</i> ,5 <i>R</i> )- <i>N,N'</i> -(tricyclo[4.3.1.1 <sup>3,8</sup> ]undecane-4,5-diyl)bis(1-phenylmethanimine) ( <b>18</b> ) .....                  | S45 |
| 4. Computational details of specific rotation determination of (4 <i>R</i> ,5 <i>R</i> )- <b>8a'</b> .....                                                                     | S47 |
| References .....                                                                                                                                                               | S90 |

## 1. General information

IR spectra were recorded on a Shimadzu IR Affinity-1 spectrophotometer with single-reflection ATR accessory.  $^1\text{H}$  and  $^{13}\text{C}$  NMR spectra were recorded with a JEOL JNM-ECX400 spectrometer at 399.78 and 100.53 MHz in  $\text{CDCl}_3$  and  $\text{DMSO}-d_6$  solution. Chemical shifts and coupling constants were recorded in units of parts per million and hertz, respectively. The peak of a solvent was used as internal standard. Elemental analysis was performed on a CHNS EuroVector EA-3000 EA analyzer. Melting points were determined by capillary method on a SRS OptiMelt MPA100 apparatus and are uncorrected. Specific optical rotation was measured on an Autopol V Plus automatic polarimeter (Rudolph Research Analytical) in a 1 dm cuvette at 25 °C at a wavelength of 589 nm for all substances, while additional wavelengths 365, 405, 436, 546 and 633 nm were used for (4*R*,5*R*)-**8a'**. The enantiomeric purity of the products was determined by HPLC analysis on Shimadzu Prominence LC-20AD (Spd-20a uv vis detector, Cto-20a column over, Dgu-20a degassing unit) equipped with a chiral stationary phase column (ChiralPAK AD-3) with hexane/2-propanol as eluent (flow rate 1.2 mL/min, column temperature 30 °C). Monitoring of the reaction was done by TLC on Merck plates (display with  $\text{I}_2$  vapor and UV light). Aziridine **9** was obtained by the described method [1].

## 2. Synthetic procedures

### Tricyclo[4.3.1.1<sup>3,7</sup>]undec-4-en (**2**)

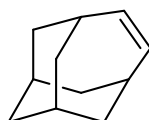

Conc.  $\text{H}_3\text{PO}_4$  (10 mL) was added to tricyclo[4.3.1.1<sup>3,8</sup>]undecane-4-ol (**1**, 5 g, 0.03 mol). The resulting mixture was heated to 180 °C in a sublimation apparatus. The sublimed crystals were dissolved in  $\text{CH}_2\text{Cl}_2$ , the organic solution was washed with water (2 x 50 mL), dried over  $\text{Na}_2\text{SO}_4$ , and concentrated under reduced pressure. Yield of **2** is 2.5 g (56%), colorless crystals, mp 237–238 °C [lit. [2] mp 237.5–238.5 °C].

### 5-Chlorotricyclo[4.3.1.1<sup>3,8</sup>]undecane-4-one oxime (**3**)

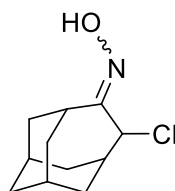

Conc.  $\text{HCl}$  (23.4 mL) was added dropwise to a solution of tricyclo[4.3.1.1<sup>3,8</sup>]undec-4-ene (**2**, 5.9 g, 0.04 mol) in *tert*-butyl nitrite (14 mL) at –10 °C. The solution was stirred for 3 h at –10 °C. The precipitate was filtered, washed with petroleum ether, and recrystallized from EtOH. Yield of **3** is 4.7 g (55%), colorless crystals, mp 158–160 °C.

IR (ATR): 2907, 2859, 1665, 1464, 1354, 1062, 707  $\text{cm}^{-1}$ .

$^1\text{H}$  NMR ( $\text{CDCl}_3$ , 400 MHz),  $\delta$ , ppm: 8.57 (br s, 1H, OH), 5.11 (d, 1H,  $J = 4.8$  Hz, CH), 2.89-2.93 (m, 1H, CH), 2.45-2.50 (m, 1H, CH), 2.33-2.41 (m, 1H, CH), 2.03-2.12 (m, 1H, CH), 1.91-1.99 (m, 5H, 5CH), 1.50-1.70 (m, 5H, 5CH).

$^{13}\text{C}$  NMR ( $\text{CDCl}_3$ , 100 MHz),  $\delta$ , ppm: 165.2 (C=N), 55.9 (CH), 38.3 ( $\text{CH}_2$ ), 38.2 (CH), 35.8 (CH), 35.8 ( $\text{CH}_2$ ), 34.1 ( $\text{CH}_2$ ), 32.0 ( $\text{CH}_2$ ), 31.9 ( $\text{CH}_2$ ), 26.8 (CH), 26.7 (CH).

Anal. Calcd for  $\text{C}_{11}\text{H}_{16}\text{ClNO}$ : C, 61.82; H, 7.55; N, 6.55. Found: C, 61.89; H, 7.51; N, 6.59.

### 5-Azidotricyclo[4.3.1.1<sup>3,8</sup>]undecane-4-one oxime (4)

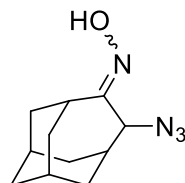

A solution of  $\text{NaN}_3$  (0.24 g, 3.75 mmol) in water (3.8 mL) was added to a solution of 5-chlorotricyclo[4.3.1.1<sup>3,8</sup>]undecane-4-one oxime (**3**, 0.8 g, 3.75 mmol) in acetone (3.8 mL). The mixture was stirred for 2 h at room temperature, then acetone was evaporated in vacuo. The residue was extracted with  $\text{CHCl}_3$  (3  $\times$  2 mL). The total organic extracts were dried over  $\text{Na}_2\text{SO}_4$ , and concentrated under reduced pressure. The product was recrystallized from MeOH. Yield of **4** is 0.44 g (53%), colorless crystals, mp 121–122  $^\circ\text{C}$ .

IR (ATR): 3200, 2899, 2853, 2087, 1443, 1236, 939  $\text{cm}^{-1}$ .

$^1\text{H}$  NMR ( $\text{CDCl}_3$ , 400 MHz),  $\delta$ , ppm: 9.06 (br s, 1H, OH), 4.28 (d,  $J = 5.2$  Hz, 1H, CH), 3.74-3.79 (m, 1H, CH), 2.02-2.26 (m, 1H, CH), 1.78-1.99 (m, 6H, 6CH), 1.49-1.70 (m, 6H, 6CH).

$^{13}\text{C}$  NMR ( $\text{CDCl}_3$ , 100 MHz),  $\delta$ , ppm: 164.2 (C=N), 68.1 (CH), 35.7 ( $\text{CH}_2$ ), 34.8 ( $\text{CH}_2$ ), 34.1 ( $\text{CH}_2$ ), 33.7 (CH), 32.1 ( $\text{CH}_2$ ), 31.2 ( $\text{CH}_2$ ), 29.3 (CH), 26.8 (2CH).

Anal. Calcd for  $\text{C}_{11}\text{H}_{16}\text{N}_4\text{O}$ : C, 59.98; H, 7.32; N, 25.44. Found: C, 59.94; H, 7.36; N, 25.41.

### 5-(Benzylamino)tricyclo[4.3.1.1<sup>3,8</sup>]undecan-4-one oxime (5)

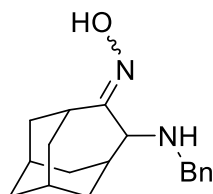

Benzylamine (1.07 g, 1.09 mL, 10 mmol) was added dropwise to a solution of 5-chlorotricyclo[4.3.1.1<sup>3,8</sup>]undecan-4-one oxime (**3**, 1 g, 5 mmol) in  $\text{CH}_2\text{Cl}_2$  (5 mL). After stirring for 2 h at room temperature, the mixture was washed with water (2  $\times$  10 mL). The organic extracts were dried over  $\text{Na}_2\text{SO}_4$ , and concentrated under reduced pressure. Yield of **5** is 0.68 g (51%), light purple crystals, mp 115-117  $^\circ\text{C}$ .

IR (ATR): 3059, 3026, 2897, 2840, 1603, 1452, 1356, 932  $\text{cm}^{-1}$ .

$^1\text{H}$  NMR ( $\text{CDCl}_3$ , 400 MHz),  $\delta$ , ppm: 7.27-7.35 (m, 5H, CH and OH), 7.20-7.24 (m, 1H, CH), 3.89 (d,  $J = 13.5$  Hz, 1H, CH), 3.76 (d,  $J = 13.5$  Hz, 1H, CH), 3.65 (t,  $J = 6.0$  Hz, 1H, CH), 3.37 (d,  $J = 2.3$  Hz, 1H, CH), 2.19-2.22 (m, 1H, CH), 1.96-2.02 (m, 1H, CH), 1.88-1.93 (m, 3H, 3CH), 1.67-1.85 (m, 4H, 4CH), 1.51-1.63 (m, 4H, 4CH).

$^{13}\text{C}$  NMR ( $\text{CDCl}_3$ , 100 MHz),  $\delta$ , ppm: 165.9 (C=N), 140.3 (C), 128.4 (2CH), 128.1 (2CH), 126.9 (CH), 65.2 (CH), 51.4 ( $\text{CH}_2$ ), 37.4 ( $\text{CH}_2$ ), 36.2 ( $\text{CH}_2$ ), 34.4 ( $\text{CH}_2$ ), 33.1 (CH), 32.9 ( $\text{CH}_2$ ), 30.0 ( $\text{CH}_2$ ), 29.6 (CH), 27.0 (CH), 26.9 (CH).

Anal. Calcd for  $\text{C}_{18}\text{H}_{24}\text{N}_2\text{O}$ : C, 76.02; H, 8.51; N, 9.85. Found: C, 76.10; H, 8.55; N, 9.83.

### Tricyclo[4.3.1.1<sup>3,8</sup>]undecane-4-amine hydrochloride (6)

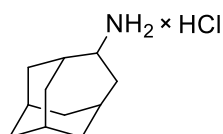

$\text{NaBH}_4$  (0.5 g, 0.013 mol) was added portionwise to a mixture of 5-azidotricyclo[4.3.1.1<sup>3,8</sup>]undecan-4-one oxime (**4**, 0.8 g, 4 mmol) and  $\text{NiCl}_2$  (0.34 g, 2.6 mmol) in MeOH (5 mL) at 10 °C. The reaction mixture was stirred for 6 h at room temperature, then poured into water (25 mL). A 5% aq NaOH solution was added to adjust pH 14, and the mixture was extracted with  $\text{CH}_2\text{Cl}_2$  (5 x 5 mL). The total organic extracts were dried over  $\text{Na}_2\text{SO}_4$ , and the solvent was evaporated under reduced pressure. The residue was purified by column chromatography ( $\text{CHCl}_3$ -EtOH, 50:1). The resulting oil was dissolved in  $\text{Et}_2\text{O}$  and HCl gas was passed through the solution. Yield of **6** is 0.39 g (49%), yellow crystals, mp 283–285 °C [1,3].

IR (ATR): 3404, 2901, 2848, 1560, 1447  $\text{cm}^{-1}$ .

$^1\text{H}$  NMR data for the **free amine** ( $\text{CDCl}_3$ , 400 MHz),  $\delta$ , ppm: 4.97 (br s, 2H,  $\text{NH}_2$ ), 3.39 (t,  $J = 8$  Hz, 1H, CH), 2.41-2.49 (m, 1H, CH), 2.06-2.13 (m, 2H, 2CH), 1.83-1.99 (m, 6H, 6CH), 1.74-1.79 (m, 1H, CH), 1.45-1.60 (m, 6H, 6CH).

$^{13}\text{C}$  NMR data for the **free amine** ( $\text{CDCl}_3$ , 100 MHz),  $\delta$ , ppm: 57.0 (CH), 41.4 ( $\text{CH}_2$ ), 40.6 ( $\text{CH}_2$ ), 38.3 (CH), 38.1 ( $\text{CH}_2$ ), 36.3 ( $\text{CH}_2$ ), 34.6 ( $\text{CH}_2$ ), 29.6 (CH), 29.4 ( $\text{CH}_2$ ), 27.0 (CH), 26.7 (CH).

### 5-Azidotricyclo[4.3.1.1<sup>3,8</sup>]undecan-4-amine hydrochloride (7)

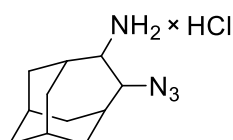

$\text{MoO}_3 \cdot \text{H}_2\text{O}$  (2.48 g, 17.0 mmol) was added to a solution of 5-azidotricyclo[4.3.1.1<sup>3,8</sup>]undecane-4-one oxime (**4**, 1.1 g, 5.3 mmol) in MeOH (10 mL). Then,  $\text{NaBH}_4$  (1.28 g, 34.0 mmol) was added portionwise to the resulting suspension at 0 °C. The reaction mixture was stirred for 2 h at room temperature and poured into water (30 mL). A 5% aq NaOH solution was added to adjust pH 14, and the mixture was extracted with  $\text{CH}_2\text{Cl}_2$  (5 x 5 mL). The total organic extracts were dried over

Na<sub>2</sub>SO<sub>4</sub>, and the solvent was evaporated under reduced pressure. The resulting oil was dissolved in Et<sub>2</sub>O and HCl gas was passed through the solution. Yield of **7** is 0.7 g (69%), colorless crystals, mp 190–193 °C.

IR (ATR): 3360, 2903, 2853, 2106, 1447, 1271, 1100, 943 cm<sup>-1</sup>.

<sup>1</sup>H NMR (DMSO-*d*<sub>6</sub>, 400 MHz), δ, ppm: 8.12 (br s, 3H, NH<sub>3</sub><sup>+</sup>), 4.32-4.36 (m, 1H, CH), 3.56 (t, 1H, *J* = 6.4 Hz, CH), 2.29-2.34 (m, 1H, CH), 2.05-2.09 (m, 1H, CH), 1.70-1.80 (m, 6H, 6CH), 1.45-1.58 (m, 6H, 6CH).

<sup>13</sup>C NMR (DMSO-*d*<sub>6</sub>, 100 MHz), δ, ppm: 65.2 (CH), 56.3 (CH), 37.3 (CH<sub>2</sub>), 36.1 (CH<sub>2</sub>), 34.8 (CH), 34.2 (CH), 32.2 (CH<sub>2</sub>), 31.5 (CH<sub>2</sub>), 29.0 (CH<sub>2</sub>), 26.4 (CH), 26.3 (CH).

Anal. Calcd for C<sub>11</sub>H<sub>19</sub>ClN<sub>4</sub>: C, 54.43; H, 7.89; N, 23.08. Found: C, 54.47; H, 7.86; N, 23.10.

### ***trans/cis*-4,5-Diaminohomoadamantane dihydrochloride (8a,b)**

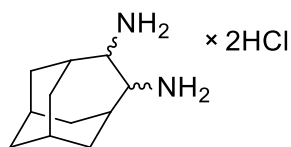

A solution of 5-azidotricyclo[4.3.1.1<sup>3,8</sup>]undecane-4-one oxime (**4**, 0.78 g, 3.55 mmol) in Et<sub>2</sub>O (8 mL) was added to the suspension of LiAlH<sub>4</sub> (0.54 g, 14.2 mmol) in Et<sub>2</sub>O (11 mL) at 0 °C under an inert atmosphere. The reaction mixture was stirred at room temperature for 2 h, cooled to 5 °C, and then quenched by the dropwise successive addition of water (0.54 mL), a 15% aqueous NaOH solution (0.54 mL), and water (1.62 mL). The mixture was stirred at room temperature for an additional 1 h. The precipitate was filtered off and washed with Et<sub>2</sub>O (3 × 5 mL). The filtrate was evaporated under reduced pressure. The residue was dissolved in MeOH and HCl gas was passed through. The precipitate was filtered off. Yield of **8a,b** is 0.52 g (58%), *dr* = 5:1, colorless crystals, mp 338–340 °C [4].

IR (ATR): 3020, 2900, 2850, 2548, 1598, 1571, 1500, 1452, 1040, 1012 cm<sup>-1</sup>.

<sup>1</sup>H NMR (DMSO-*d*<sub>6</sub>, 400 MHz), δ, ppm: 8.77 (s, 6H, 2NH<sub>2</sub>×2HCl), 8.67 (s, 6H, 2NH<sub>2</sub>×2HCl), 3.86 (s, 2H, 2CH), 3.38 (s, 2H, 2CH), 2.21-2.25 (m, 2H, 2CH), 2.10-2.14 (m, 2H, 2CH), 1.52-1.91 (m, 20H, 20CH), 1.47 (s, 4H, 4CH).

<sup>13</sup>C NMR (DMSO-*d*<sub>6</sub>, 100 MHz), δ, ppm: 60.1 (2CH *trans*), 55.6 (2CH *cis*), 36.5 (CH<sub>2</sub> *trans*), 35.6 (CH<sub>2</sub> *trans*), 34.8 (CH<sub>2</sub> *cis*), 34.7 (CH *cis*), 34.4 (2CH *trans*), 29.9 (CH<sub>2</sub> *cis*), 29.0 (3CH<sub>2</sub> *trans*), 26.1 (CH *cis*), 25.8 (CH *cis*), 25.7 (2CH *trans*).

Anal. Calcd for C<sub>11</sub>H<sub>22</sub>Cl<sub>2</sub>N<sub>2</sub>: C, 52.18; H, 8.76; N, 11.06. Found: C, 52.21; H, 8.74; N, 11.09.

### ***tert*-Butyl 5-azatetracyclo[5.3.1.1<sup>3,9</sup>.0<sup>4,6</sup>]dodecane-5-carboxylate (**10**)**

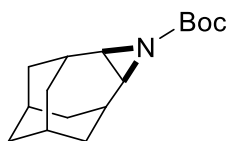

To a solution of 5-azatetracyclo[5.3.1.1<sup>3,9</sup>.0<sup>4,6</sup>]dodecane (**9**, 0.89 g, 5.4 mmol) in CH<sub>2</sub>Cl<sub>2</sub> (15 mL) at 0 °C were added Et<sub>3</sub>N (1.18 g, 1.2 mL, 11.6 mmol) and Boc<sub>2</sub>O (1.18 g, 5.4 mmol). The reaction mixture was stirred at room temperature for 1 h and then washed with water (2 × 20 mL) and saturated NaCl solution (2 × 20 mL). The organic layer was dried over Na<sub>2</sub>SO<sub>4</sub>, and the solvent was evaporated under reduced pressure. The residue was purified by column chromatography (petroleum ether/EtOAc 10:1). Yield of **10** is 1.2 g (80%), colorless crystals, mp 40–42 °C.

IR (ATR): 2897, 2846, 1680, 1529, 1448, 1363, 1253, 1163, 1053, 1020 cm<sup>-1</sup>.

<sup>1</sup>H NMR (CDCl<sub>3</sub>, 400 MHz), δ, ppm: 2.54-2.59 (m, 2H, 2CH), 2.39-2.43 (m, 2H, 2CH), 1.68-1.87 (m, 6H, 6CH), 1.51-1.62 (m, 6H, 6CH), 1.41 (s, 9H, 3CH<sub>3</sub>).

<sup>13</sup>C NMR (CDCl<sub>3</sub>, 100 MHz), δ, ppm: 163.2 (C=O), 80.2 (C-O), 44.9 (2CH), 36.2 (CH<sub>2</sub>), 34.3 (2CH<sub>2</sub>), 30.6 (2CH<sub>2</sub>), 30.0 (2CH), 28.1 (3CH<sub>3</sub>), 27.8 (CH), 25.7 (CH).

Anal. Calcd for C<sub>16</sub>H<sub>25</sub>NO<sub>2</sub>: C, 72.97; H, 9.57; N, 5.32. Found: C, 72.92; H, 9.61; N, 5.36.

### ***cis*-5-*p*-Tosyl-5-azatetracyclo[5.3.1.1<sup>3,9</sup>.0<sup>4,6</sup>]dodecane (**11**)**

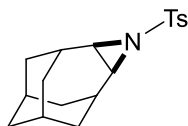

To a solution of 5-azatetracyclo[5.3.1.1<sup>3,9</sup>.0<sup>4,6</sup>]dodecane (**9**, 0.2 g, 1.2 mmol) in CH<sub>2</sub>Cl<sub>2</sub> (10 mL) at 0 °C were added Et<sub>3</sub>N (0.14 g, 0.19 mL, 1.4 mmol) and *p*-TsCl (0.26 g, 1.4 mmol). The reaction mixture was stirred at room temperature for 2 h, washed with 5% HCl solution (2 × 15 mL) and 5% aqueous NaHCO<sub>3</sub> solution (2 × 15 mL). The organic layer was dried over Na<sub>2</sub>SO<sub>4</sub>, and the solvent was evaporated under reduced pressure. The residue was purified by column chromatography (petroleum ether/EtOAc 10:1). Yield of **11** is 0.34 g (87%), colorless crystals, mp 80–82 °C [5].

IR (ATR): 2910, 2845, 1597, 1448, 1323, 1155, 1083, 867, 796, 667, 572, 557 cm<sup>-1</sup>.

<sup>1</sup>H NMR (CDCl<sub>3</sub>, 400 MHz), δ, ppm: 7.80 (d, *J* = 8.0 Hz, 2H, 2CHAR), 7.29 (d, *J* = 8.0 Hz, 2H, 2CHAR), 2.95-2.99 (m, 2H, 2CH), 2.42 (s, 3H, CH<sub>3</sub>), 2.33 (br s, 2H, 2CH), 1.87 (br s, 1H, CH), 1.46-1.76 (m, 9H, 9CH), 1.41 (s, 2H, 2CH).

<sup>13</sup>C NMR (CDCl<sub>3</sub>, 100 MHz), δ, ppm: 143.9 (C), 136.1 (C), 129.3 (2CH), 127.6 (2CH), 47.0 (2CH), 36.1 (CH<sub>2</sub>), 33.9 (2CH<sub>2</sub>), 30.6 (2CH<sub>2</sub>), 29.5 (2CH), 27.6 (CH), 25.6 (CH), 21.7 (CH<sub>3</sub>).

Anal. Calcd for C<sub>18</sub>H<sub>23</sub>NO<sub>2</sub>S: C, 68.11; H, 7.30; N, 4.41; S, 10.10. Found: C, 68.15; H, 7.34; N, 4.38; S, 10.17.

***cis*-5-((Trifluoromethyl)sulfonyl)-5-azatetracyclo[5.3.1.1<sup>3,9</sup>.0<sup>4,6</sup>]dodecane (12)**

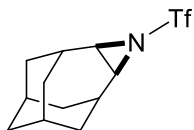

To a solution of 5-azatetracyclo[5.3.1.1<sup>3,9</sup>.0<sup>4,6</sup>]dodecane (**9**, 7.37 g, 44.9 mmol) in CH<sub>2</sub>Cl<sub>2</sub> (70 mL) at 0 °C were added Et<sub>3</sub>N (6.84 g, 9.4 mL, 67.8 mmol) and Tf<sub>2</sub>O (14.25 g, 8.5 mL, 50.5 mmol). The reaction mixture was stirred at room temperature for 2 h, washed with 5% HCl solution (2 × 50 mL), 5% aqueous NaHCO<sub>3</sub> solution (2 × 50 mL), and water (2 × 50 mL). The organic layer was dried over Na<sub>2</sub>SO<sub>4</sub>, and the solvent was evaporated under reduced pressure. The residue was purified by column chromatography (petroleum ether). Yield of **12** is 10.1 g (76%), light yellow oil.

IR (ATR): 2902, 2852, 1444, 1361, 1179, 1126, 948, 931, 615 cm<sup>-1</sup>.

<sup>1</sup>H NMR (CDCl<sub>3</sub>, 400 MHz), δ, ppm: 3.29-3.34 (m, 2H, 2CH), 2.48-2.52 (m, 2H, 2CH), 1.56-1.94 (m, 10H, 10CH), 1.47 (s, 2H, 2CH).

<sup>13</sup>C NMR (CDCl<sub>3</sub>, 100 MHz), δ, ppm: 119.1 (CF<sub>3</sub>, *J* = 319.4 Hz), 49.4 (2CH), 35.8 (CH<sub>2</sub>), 33.3 (2CH<sub>2</sub>), 30.4 (2CH<sub>2</sub>), 29.4 (2CH), 27.3 (CH), 25.3 (CH).

Anal. Calcd for C<sub>12</sub>H<sub>16</sub>F<sub>3</sub>NO<sub>2</sub>S: C, 48.81; H, 5.46; N, 4.74; S, 10.86. Found: C, 48.87; H, 5.41; N, 4.78; S, 10.80.

***trans/cis*-N-(5-Azidotricyclo[4.3.1.1<sup>3,8</sup>]undecan-4-yl)-4-methylbenzene sulfonamide (13a,b)**

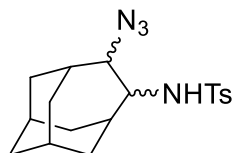

To a solution of 5-*p*-tosyl-5-azatetracyclo[5.3.1.1<sup>3,9</sup>.0<sup>4,6</sup>]dodecane (**11**, 0.34 g, 1.0 mmol) in DMF (15 mL) were added NaN<sub>3</sub> (1 g, 15.4 mmol) and NH<sub>4</sub>Cl (1.36 g, 25.4 mmol). The reaction mixture was stirred at 120–125 °C for 24 h under an inert atmosphere. After cooling, the mixture was poured into water (50 mL) and extracted with EtOAc (5 × 5 mL). The combined organic extracts were dried over Na<sub>2</sub>SO<sub>4</sub>, and the solvent was evaporated under reduced pressure. The residue was purified by column chromatography (CCl<sub>4</sub>). Yield of **13a,b** is 0.15 (39%), dr = 1:2, colorless crystals, mp 160–164 °C.

IR (ATR): 3251, 2906, 2848, 2092, 1448, 1323, 1259, 1149, 1083, 804, 794, 667, 545 cm<sup>-1</sup>.

<sup>1</sup>H NMR (CDCl<sub>3</sub>, 400 MHz), δ, ppm: 7.76-7.82 (m, 4H, 2CH *trans* + 2CH *cis*), 7.27-7.33 (m, 4H, 2CH *trans* + 2CH *cis*), 5.19 (d, *J* = 6.8 Hz, 1H, NH *cis*), 5.04 (d, *J* = 6.0 Hz, 1H, NH *trans*), 3.75-3.77 (m, 1H, CH *trans*), 3.50-3.53 (m, 1H, CH *trans*), 3.29-3.31 (m, 1H, CH *cis*), 3.19-3.22 (m, 1H, CH *cis*), 2.67 (s, 3H, CH<sub>3</sub> *cis*), 2.41 (s, 3H, CH<sub>3</sub> *trans*), 1.52-2.27 (m, 28H, 14CH *trans* + 14CH *cis*).

$^{13}\text{C}$  NMR ( $\text{CDCl}_3$ , 100 MHz),  $\delta$ , ppm: 143.5 ( $\text{C}_{trans} + \text{C}_{cis}$ ), 137.6 ( $\text{C}_{cis}$ ), 136.9 ( $\text{C}_{trans}$ ), 129.6 ( $2\text{CH}_{cis}$ ), 129.5 ( $2\text{CH}_{trans}$ ), 127.6 ( $2\text{CH}_{trans}$ ), 127.2 ( $2\text{CH}_{cis}$ ), 74.8 ( $\text{CH}_{cis}$ ), 72.6 ( $\text{CH}_{trans}$ ), 69.5 ( $\text{CH}_{trans}$ ), 65.5 ( $\text{CH}_{cis}$ ), 39.9 ( $\text{CH}_{trans}$ ), 39.0 ( $\text{CH}_2_{trans}$ ), 38.3 ( $\text{CH}_2_{trans}$ ), 38.2 ( $\text{CH}_2_{cis}$ ), 38.0 ( $\text{CH}_2_{cis}$ ), 37.2 ( $\text{CH}_{trans}$ ), 37.0 ( $\text{CH}_{cis}$ ), 36.1 ( $\text{CH}_2_{trans}$ ), 36.0 ( $\text{CH}_2_{cis}$ ), 35.8 ( $\text{CH}_{cis}$ ), 29.7 ( $\text{CH}_2_{trans}$ ), 29.4 ( $\text{CH}_2_{cis}$ ), 29.1 ( $\text{CH}_2_{cis}$ ), 29.0 ( $\text{CH}_2_{trans}$ ), 26.2 ( $\text{CH}_{cis}$ ), 26.0 ( $2\text{CH}_{trans} + 2\text{CH}_{cis}$ ), 25.9 ( $2\text{CH}_{trans}$ ).

***trans*-N-(5-Azidotricyclo[4.3.1.1<sup>3,8</sup>]undecan-4-yl)-1,1,1-trifluoromethane sulfonamide (14)**

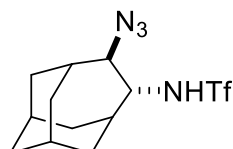

To a solution of 5-((trifluoromethyl)sulfonyl)-5-azatetra-cyclo[5.3.1.1<sup>3,9</sup>.0<sup>4,6</sup>]dodecane (**12**, 9.6 g, 32.6 mmol) in DMF (130 mL) were added  $\text{NaN}_3$  (10.6 g, 0.16 mol) and  $\text{NH}_4\text{Cl}$  (8.7 g, 0.16 mol). The reaction mixture was stirred at 110–120 °C for 12 h under an inert atmosphere. After cooling, the mixture was poured into water (700 mL) and extracted with EtOAc (5 × 40 mL). The combined organic extracts were dried over  $\text{Na}_2\text{SO}_4$ , and the solvent was evaporated under reduced pressure. The residue was purified by column chromatography ( $\text{CCl}_4$ ). Yield of **14** is 9.6 (87%), colorless crystals, mp 102–103 °C.

IR (ATR): 3275, 2906, 2860, 2102, 1448, 1379, 1226, 1192, 1147, 1035, 609  $\text{cm}^{-1}$ .

$^1\text{H}$  NMR ( $\text{DMSO}-d_6$ , 400 MHz),  $\delta$ , ppm: (s, 1H, NH), 3.67-3.69 (m, 1H, CH), 3.34 (br s, 1H, CH), 2.12-2.15 (m, 1H, CH), 1.93-1.95 (m, 1H, CH), 1.43-1.84 (m, 12H, 12CH).

$^{13}\text{C}$  NMR ( $\text{DMSO}-d_6$ , 100 MHz),  $\delta$ , ppm: 119.9 ( $\text{CF}_3$ ,  $J = 321.3$  Hz), 72.9 (CH), 67.5 (CH), 39.1 (CH), 38.1 ( $\text{CH}_2$ ), 37.9 ( $\text{CH}_2$ ), 35.9 (CH), 35.8 ( $\text{CH}_2$ ), 29.5 ( $\text{CH}_2$ ), 28.8 ( $\text{CH}_2$ ), 26.0 (CH), 25.9 (CH).

Anal. Calcd for  $\text{C}_{12}\text{H}_{17}\text{F}_3\text{N}_4\text{O}_2\text{S}$ : C, 42.60; H, 5.06; N, 16.56; S, 9.48. Found: C, 42.66; H, 5.10; N, 16.51; S, 9.52.

***trans*-N-(5-Aminotricyclo[4.3.1.1<sup>3,8</sup>]undecan-4-yl)-1,1,1-trifluoromethanesulfonamide (15)**

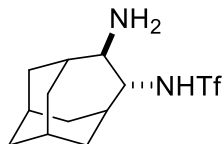

A solution of *trans*-N-(5-azidotricyclo[4.3.1.1<sup>3,8</sup>]undecane-4-yl)-1,1,1-trifluoromethanesulfonamide (**14**, 0.25 g, 0.74 mmol) in THF (5 mL) was added dropwise to a suspension of  $\text{LiAlH}_4$  (0.11 g, 3.0 mmol) in THF (30 mL) at 5 °C under an inert atmosphere. The reaction mixture was stirred at room temperature for 4 h, cooled to 5 °C, and then quenched by the dropwise successive addition of water (0.11 mL), 15% aqueous  $\text{NaOH}$  solution (0.11 mL), and water (0.33 mL). After stirring at room temperature for an additional 1 h, the precipitate was filtered off and washed with  $\text{Et}_2\text{O}$

(3 × 5 mL). The filtrate was evaporated under reduced pressure. Yield of **15** is 0.13 g (57%), colorless oil.

IR (ATR): 2900, 2849, 1647, 1446, 1379, 1259, 1186, 798, 607 cm<sup>-1</sup>.

<sup>1</sup>H NMR (DMSO-*d*<sub>6</sub>, 400 MHz), δ, ppm: (s, 2H, NH<sub>2</sub>), 4.26-4.31 (m, 1H, NH), 3.12 (d, 1H, *J* = 7.2 Hz, CH), 2.88 (d, 1H, *J* = 7.6 Hz, CH), 1.95-1.98 (m, 1H, CH), 1.73-1.85 (m, 6H, 6CH), 1.45-1.60 (m, 5H, 5CH).

<sup>13</sup>C NMR (DMSO-*d*<sub>6</sub>, 100 MHz), δ, ppm: 123.0 (CF<sub>3</sub>, *J* = 330.8 Hz), 66.8 (CH), 65.3 (CH), 39.5 (CH), 39.0 (CH<sub>2</sub>), 38.8 (CH<sub>2</sub>), 33.5 (CH), 36.6 (CH<sub>2</sub>), 29.4 (CH<sub>2</sub>), 29.1 (CH<sub>2</sub>), 26.3 (CH), 26.2 (CH).

Anal. Calcd for C<sub>12</sub>H<sub>19</sub>F<sub>3</sub>N<sub>2</sub>O<sub>2</sub>S: C, 46.14; H, 6.13; N, 8.97; S, 10.26. Found: C, 46.18; H, 6.09; N, 8.93; S, 10.22.

### ***trans*-4,5-Diaminohomoadamantane dihydrochloride (**8a**)**

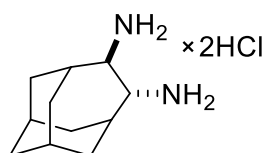

A Red-Al solution (60% in toluene, 34.9 g, 33.7 mL, 0.1 mol) was added dropwise to a solution of *N*-(5-azidotricyclo[4.3.1.1<sup>3,8</sup>]undecan-4-yl)-1,1,1-trifluoromethane sulfonamide (**14**, 5 g, 14.8 mmol) in toluene (50 mL) under an inert atmosphere. The reaction mixture was heated under reflux for 48 h, cooled to room temperature, and then quenched by the dropwise addition of a 4% aqueous NaOH solution (50 mL). After stirring for 6 h, the precipitate was filtered off and washed with toluene (3 × 10 mL). The organic layer was separated, dried over Na<sub>2</sub>SO<sub>4</sub>, and concentrated under reduced pressure. The residue was dissolved in a minimal amount of MeOH, acidified to pH 1 with concentrated HCl, and treated with MTBE. The resulting precipitate was collected by filtration. The reprecipitation was repeated in the MeOH/MTBE. Yield of **8a** is 1.65 g (44%), colorless crystals, mp >290 °C (with decomposition) (lit. [4] mp >300 °C (with decomposition)).

IR (ATR): 3020, 2900, 2850, 2546, 1597, 1573, 1500, 1454, 1041, 1014, 551 cm<sup>-1</sup>.

<sup>1</sup>H NMR (DMSO-*d*<sub>6</sub>, 400 MHz), δ, ppm: (s, 6H, 2NH<sub>2</sub>×2HCl), 3.34 (s, 2H, 2CH), 2.16 (br s, 2H, 2CH), 1.97-2.00 (m, 2H, 2CH), 1.79 (br s, 4H, 4CH), 1.59-1.63 (m, 4H, 4CH), 1.47 (s, 2H, 2CH).

<sup>13</sup>C NMR (DMSO-*d*<sub>6</sub>, 100 MHz), δ, ppm: 60.1 (2CH), 36.5 (CH<sub>2</sub>), 35.6 (CH<sub>2</sub>), 34.4 (2CH), 29.0 (3CH<sub>2</sub>), 25.7 (2CH).

### ***trans*-4,5-Diaminohomoadamantane (**8a'**)**

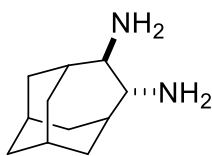

To a stirred solution of *trans*-4,5-diaminohomoadamantane dihydrochloride (**8a**, 0.86 g, 3.43 mmol) in water (10 mL) and CH<sub>2</sub>Cl<sub>2</sub> (5 mL) was added NaOH (0.26 g, 6.5 mmol). The mixture was stirred for 15 min, and the organic layer was separated. The aqueous layer was extracted with CH<sub>2</sub>Cl<sub>2</sub> (4 × 5 mL). The combined organic extracts were dried over K<sub>2</sub>CO<sub>3</sub>, and the solvent was evaporated under reduced pressure. Yield of **8a'** is 0.56 g (90%), colorless oil.

IR (ATR): 3336, 3267, 2897, 2846, 1589, 1450, 1346, 902, 860, 725 cm<sup>-1</sup>.

### **(4*R*,5*R*)-4,5-Diaminohomoadamantane ((4*R*,5*R*)-**8a'**)**

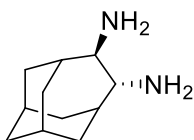

A mixture of *trans*-4,5-diaminohomoadamantane **8a'** (0.8 g, 5.3 mmol) and dibenzoyl-L-tartaric acid (4.01 g, 10.7 mmol) in water (12 mL) and EtOH (6 mL) was heated under reflux for 15 min. The solvent was evaporated under reduced pressure. The residue was dissolved in a minimal amount of hot MeOH, CHCl<sub>3</sub> (3 mL) was added, the mixture was left for 24 h at 5 °C, the precipitate was filtered off. Reprecipitation was repeated twice until a constant optical rotation was achieved ( $[\alpha]_D^{25} = +14.1^\circ$  (c 0.5, EtOH–H<sub>2</sub>O, 1:1)). Yield of salt is 0.72 g, colorless crystals.

To a stirred solution of the salt (0.72 g) in water (30 mL) and CH<sub>2</sub>Cl<sub>2</sub> (10 mL) was added NaOH (0.13 g, 3.25 mmol). After stirring for 15 min, the organic layer was separated. The aqueous layer was extracted with CH<sub>2</sub>Cl<sub>2</sub> (4 × 5 mL). The combined organic extracts were dried over K<sub>2</sub>CO<sub>3</sub>, and the solvent was evaporated under reduced pressure. Yield of (4*R*,5*R*)-**8a'** is 0.11 g (15%), colorless oil,  $[\alpha]_D^{25} = +13.1^\circ$  (c 0.2, CH<sub>2</sub>Cl<sub>2</sub>).

### ***trans*-Decahydro-4,8:6,10-dimethanocyclonona[d]imidazole-2(1*H*)-thione (**16**)**

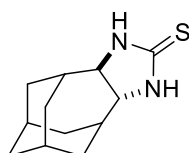

Carbon disulfide (42 mg, 0.03 mL, 0.61 mmol) was added to a solution of *trans*-4,5-diaminohomoadamantane (**8a'**, 0.1 g, 0.56 mmol) in EtOH (8 mL) and water (2 mL). The reaction mixture was heated under reflux for 3 h. Then, three drops of concentrated HCl were added, and the mixture was heated under reflux for an additional 5 h. The solvent was evaporated under reduced pressure, and the residue

was recrystallized from aqueous EtOH. Yield of **16** is 91 mg (74%), colorless crystals, mp 270–278 °C (with decomposition).

IR (ATR): 3020, 2900, 2850, 2546, 1597, 1573, 1500, 1454, 1041, 1014, 551 cm<sup>-1</sup>.

<sup>1</sup>H NMR (CDCl<sub>3</sub>, 400 MHz), δ, ppm: 7.94 (s, 2 H, 2NH), 4.01 (s, 2H, 2CH), 1.89 (s, 2H, 2CH), 1.72-1.80 (m, 4H, 4CH), 1.49-1.57 (m, 6H, 6CH), 1.33-1.36 (m, 2H, 2CH).

<sup>13</sup>C NMR (CDCl<sub>3</sub>, 100 MHz), δ, ppm: 180.2 (C=S), 64.9 (2CH), 35.9 (CH<sub>2</sub>), 34.6 (2CH), 34.3 (2CH<sub>2</sub>), 30.8 (2CH<sub>2</sub>), 26.8 (CH), 26.1 (CH).

Anal. Calcd for C<sub>12</sub>H<sub>18</sub>N<sub>2</sub>S: C, 64.82; H, 8.16; N, 12.60; S, 14.42. Found: C, 64.87; H, 8.11; N, 12.64; S, 14.38.

### 2,3-Diphenyl-4a,6,7,8,9,10,11,11a-octahydro-5H-5,9:7,11-dimethanocyclonona[b]pyrazine (**17**)

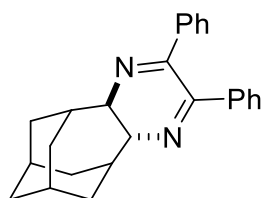

A mixture of *trans*-4,5-diaminohomoadamantane (**8a'**, 0.12 g, 0.7 mmol), 1,2-diphenylethane-1,2-dione (0.12 g, 0.6 mmol) and *p*-TsOH (13 mg, 0.07 mmol) in EtOH (5 mL) was heated under reflux for 3 h. The mixture was cooled to room temperature, and the precipitate that formed was filtered off. Yield of **17** is 0.13 g (56%), light yellow crystals, mp 165–167 °C.

IR (ATR): 3059, 3028, 2900, 2850, 1539, 1442, 1249, 1022, 748, 694, 584 cm<sup>-1</sup>.

<sup>1</sup>H NMR (CDCl<sub>3</sub>, 400 MHz), δ, ppm: 7.39-7.42 (m, 4H, 4CH), 7.20-7.28 (m, 6H, 6CH), 2.86 (s, 2H, 2CH), 2.74 (s, 2H, 2CH), 1.89-2.00 (m, 8H, 8CH), 1.63 (s, 4H, 4CH).

<sup>13</sup>C NMR (CDCl<sub>3</sub>, 100 MHz), δ, ppm: 159.5 (2C=N), 137.6 (2C), 129.4 (2CH), 128.2 (4CH), 128.0 (4CH), 68.8 (2CH), 40.4 (2CH<sub>2</sub>), 37.6 (CH<sub>2</sub>), 37.1 (2CH), 29.9 (2CH<sub>2</sub>), 27.3 (2CH).

Anal. Calcd for C<sub>25</sub>H<sub>26</sub>N<sub>2</sub>: C, 84.70; H, 7.39; N, 7.90. Found: C, 84.79; H, 7.35; N, 7.86.

### (4*R*,5*R*)-2,3-Diphenyl-4a,6,7,8,9,10,11,11a-octahydro-5H-5,9:7,11-dimethanocyclonona[b]pyrazine ((4*R*,5*R*)-**17**)

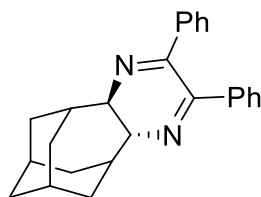

The compound (4*R*,5*R*)-**17** was obtained by a similar procedure from (4*R*,5*R*)-4,5-diaminohomoadamantane (0.03 g, 0.17 mmol), the product was purified by column

chromatography (CHCl<sub>3</sub>). Yield of (4*R*,5*R*)-**17** is 0.04 g (68%), 95% ee, light yellow crystals, mp 180-182°C,  $[\alpha]_D^{25} = +54.4^\circ$  (c 0.2, CHCl<sub>3</sub>).

HPLC analysis (ChiralPAK AD-3 column; hexane/2-propanol 93:7; flow rate 1.2 mL/min; wavelength 210 nm):  $t_R = 9.9$  min (4*R*,5*R*)-**17**, 11.3 min (4*S*,5*S*)-**17**

**(4*R*,5*R*)-*N,N'*-(Tricyclo[4.3.1.1<sup>3,8</sup>]undecane-4,5-diyl)bis(1-phenylmethanimine) (**18**)**

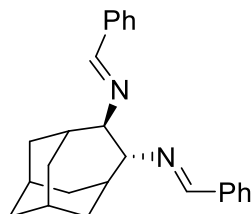

A mixture of (4*R*,5*R*)-4,5-diaminohomoadamantane (0.05 g, 0.33 mmol), *p*-TsOH (6.4 mg, 0.03 mmol) and PhCHO (0.07 g, 0.07 mL, 0.66 mmol) in MeOH (10 mL) was heated under reflux for 6 h. The mixture was cooled to room temperature, and the precipitate that formed was filtered off. Yield of **18** is 76 mg (64%), colorless crystals, mp 148–150 °C,  $[\alpha]_D^{25} = +150.9^\circ$  (c 0.1, CHCl<sub>3</sub>).

IR (ATR): 3060, 2902, 2846, 1641, 1448, 761, 696 cm<sup>-1</sup>.

<sup>1</sup>H NMR (CDCl<sub>3</sub>, 400 MHz),  $\delta$ , ppm: (s, 2H, 2CH=N), 7.60-7.64 (m, 4H, 4CH), 7.30-7.34 (m, 6H, 6CH), 3.35 (s, 2H, 2CH), 2.26-2.29 (m, 2H, 2CH), 1.81-2.02 (m, 12H, 12CH).

<sup>13</sup>C NMR (CDCl<sub>3</sub>, 100 MHz),  $\delta$ , ppm: 159.6 (2CH=N), 136.7 (2C), 130.2 (2CH), 128.5 (4CH), 128.0 (4CH), 82.1 (2CH-N), 39.6 (CH<sub>2</sub>), 38.9 (3CH<sub>2</sub>), 37.3 (CH<sub>2</sub>), 30.8 (2CH), 27.3 (2CH).

Anal. Calcd for C<sub>25</sub>H<sub>28</sub>N<sub>2</sub>: C, 84.22; H, 7.92; N, 7.86. Found: C, 84.32; H, 7.89; N, 7.79.

**(4*R*,5*R*)-*N,N'*-Dibenzyltricyclo[4.3.1.1<sup>3,8</sup>]undecane-4,5-diamine dihydrochloride (**19**)**

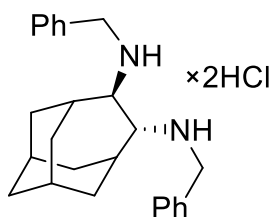

NaBH<sub>4</sub> (0.53 g, 14 mmol) was added portionwise to a stirred solution of (4*R*,5*R*)-*N,N'*-(tricyclo[4.3.1.1<sup>3,8</sup>]undecane-4,5-yl)bis(1-phenylmethanimine) (**18**, 0.5 g, 1.4 mmol) in MeOH (50 mL). The reaction mixture was stirred at room temperature for 4 h. The solvent was evaporated, water (100 mL) was added, and the mixture was extracted with CH<sub>2</sub>Cl<sub>2</sub> (3 × 30 mL). The combined organic extracts were dried over Na<sub>2</sub>SO<sub>4</sub>, and the solvent was evaporated. The residue was dissolved in a minimal amount of MeOH, acidified to pH 1 with conc. HCl, and then MTBE was added. The precipitate that

formed was filtered off. Yield of **19** is 0.49 g (81%), colorless crystals, mp 241–251 °C (with decomposition).

IR (ATR): 2924, 2858, 2619, 2453, 1597, 1570, 1469, 1454, 732 cm<sup>-1</sup>.

Anal. Calcd for C<sub>25</sub>H<sub>34</sub>Cl<sub>2</sub>N<sub>2</sub>: C, 69.27; H, 7.91; N, 6.46. Found: C, 69.20; H, 7.96; N, 6.55.

### (4*R*,5*R*)-*N,N'*-Dibenzyltricyclo[4.3.1.1<sup>3,8</sup>]undecane-4,5-diamine (**19'**)

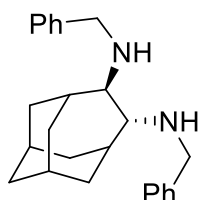

NaOH (90 mg, 2.3 mmol) was added to a stirred solution of (4*R*,5*R*)-*N,N'*-dibenzyltricyclo[4.3.1.1<sup>3,8</sup>]undecane-4,5-diamine dihydrochloride (**19**, 0.28 g, 0.65 mmol) in water (10 mL) and CH<sub>2</sub>Cl<sub>2</sub> (5 mL). The reaction mixture was stirred for 15 min. The organic layer was separated, and the aqueous layer was extracted with CH<sub>2</sub>Cl<sub>2</sub> (4 × 5 mL). The combined organic extracts were dried over Na<sub>2</sub>SO<sub>4</sub>, and the solvent was evaporated. Yield of **19'** is 0.19 g (82%), colorless oil, [ $\alpha$ ]<sub>D</sub><sup>25</sup> = +110.0° (c 0.1, CHCl<sub>3</sub>).

IR (ATR): 3300, 3028, 2904, 2846, 1600, 1448, 1352, 1140, 1028, 730, 694 cm<sup>-1</sup>.

## Henry reaction

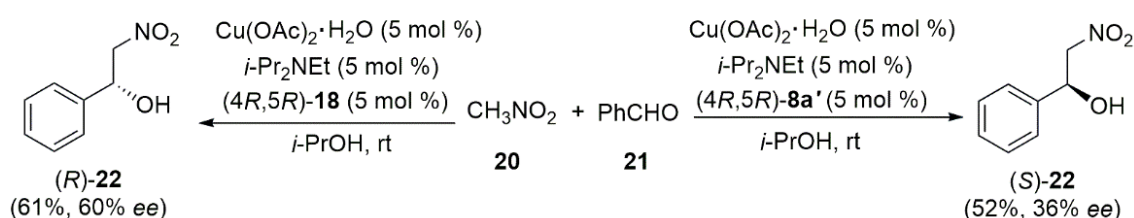

A mixture of Cu(OAc)<sub>2</sub>·H<sub>2</sub>O (9.8 mg, 0.049 mmol) and the corresponding ligand (0.049 mmol) in *i*PrOH (3 mL) was sonicated for 15 min. Then, nitromethane (**20**, 0.29 g, 4.85 mmol), (*i*Pr)<sub>2</sub>NEt (6.3 mg, 0.049 mmol), and benzaldehyde (**21**, 0.1 g, 0.98 mmol) were added. The reaction mixture was stirred for 18 h at room temperature. The solvent was evaporated under reduced pressure, and the residue was purified by column chromatography (petroleum ether/EtOAc 10:1).

Ligand (4*R*,5*R*)-**8a'** was used in an amount of 8.8 mg (5 mol %), yield of (*S*)-2-nitro-1-phenylethanol (**22**) is 85 mg (52%), 36% ee, colorless oil.

Ligand (4*R*,5*R*)-**18** was used in an amount of 17.5 mg (5 mol %), yield of (*R*)-2-nitro-1-phenylethanol (**22**) is 100 mg (61%), 60% ee, colorless oil.

HPLC analysis (ChiralPAK AD-3 column; hexane/2-propanol 98:2; flow rate 1.2 mL/min; wavelength 210 nm): *t*<sub>R</sub> = 30.2 min (*R*)-**22**, 31.6 min (*S*)-**22**.

## Michael reaction

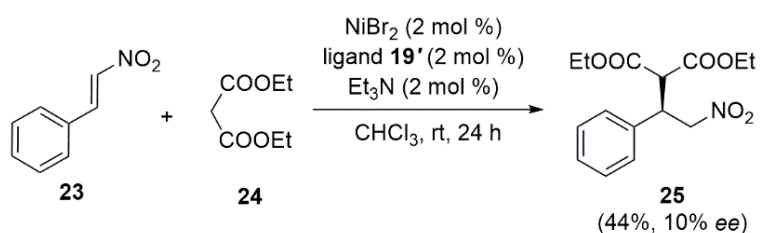

To a solution of β-nitrostyrene (**23**, 0.1 g, 0.69 mmol) and diethyl malonate (**24**, 0.1 g, 0.69 mmol) in CHCl<sub>3</sub> (4 mL) was added a mixture of ligand **19'** (5 mg, 0.014 mmol), NiBr<sub>2</sub> (3.1 mg, 0.014 mmol), and Et<sub>3</sub>N (1.4 mg, 0.014 mmol) in CHCl<sub>3</sub> (0.5 mL). The reaction mixture was stirred at room temperature for 24 h, and then the solvent was evaporated under reduced pressure. The residue was purified by column chromatography (CHCl<sub>3</sub>). Yield of (*R*)-diethyl-(2-nitro-1-phenylethyl)malonate (**25**) 88 mg (44%), 10% ee.

HPLC analysis (ChiralPAK AD-3 column; hexane/2-propanol 92:8; flow rate 1.2 mL/min; wavelength 210 nm): *t*<sub>R</sub> = 14.4 min (*R*)-**25**, 35.3 min (*S*)-**25**.

### 3. <sup>1</sup>H NMR and <sup>13</sup>C NMR spectra for synthesized compounds

#### 3.1. NMR spectra of 5-chlorotricyclo[4.3.1.1<sup>3,8</sup>]undecane-4-one oxime (3)

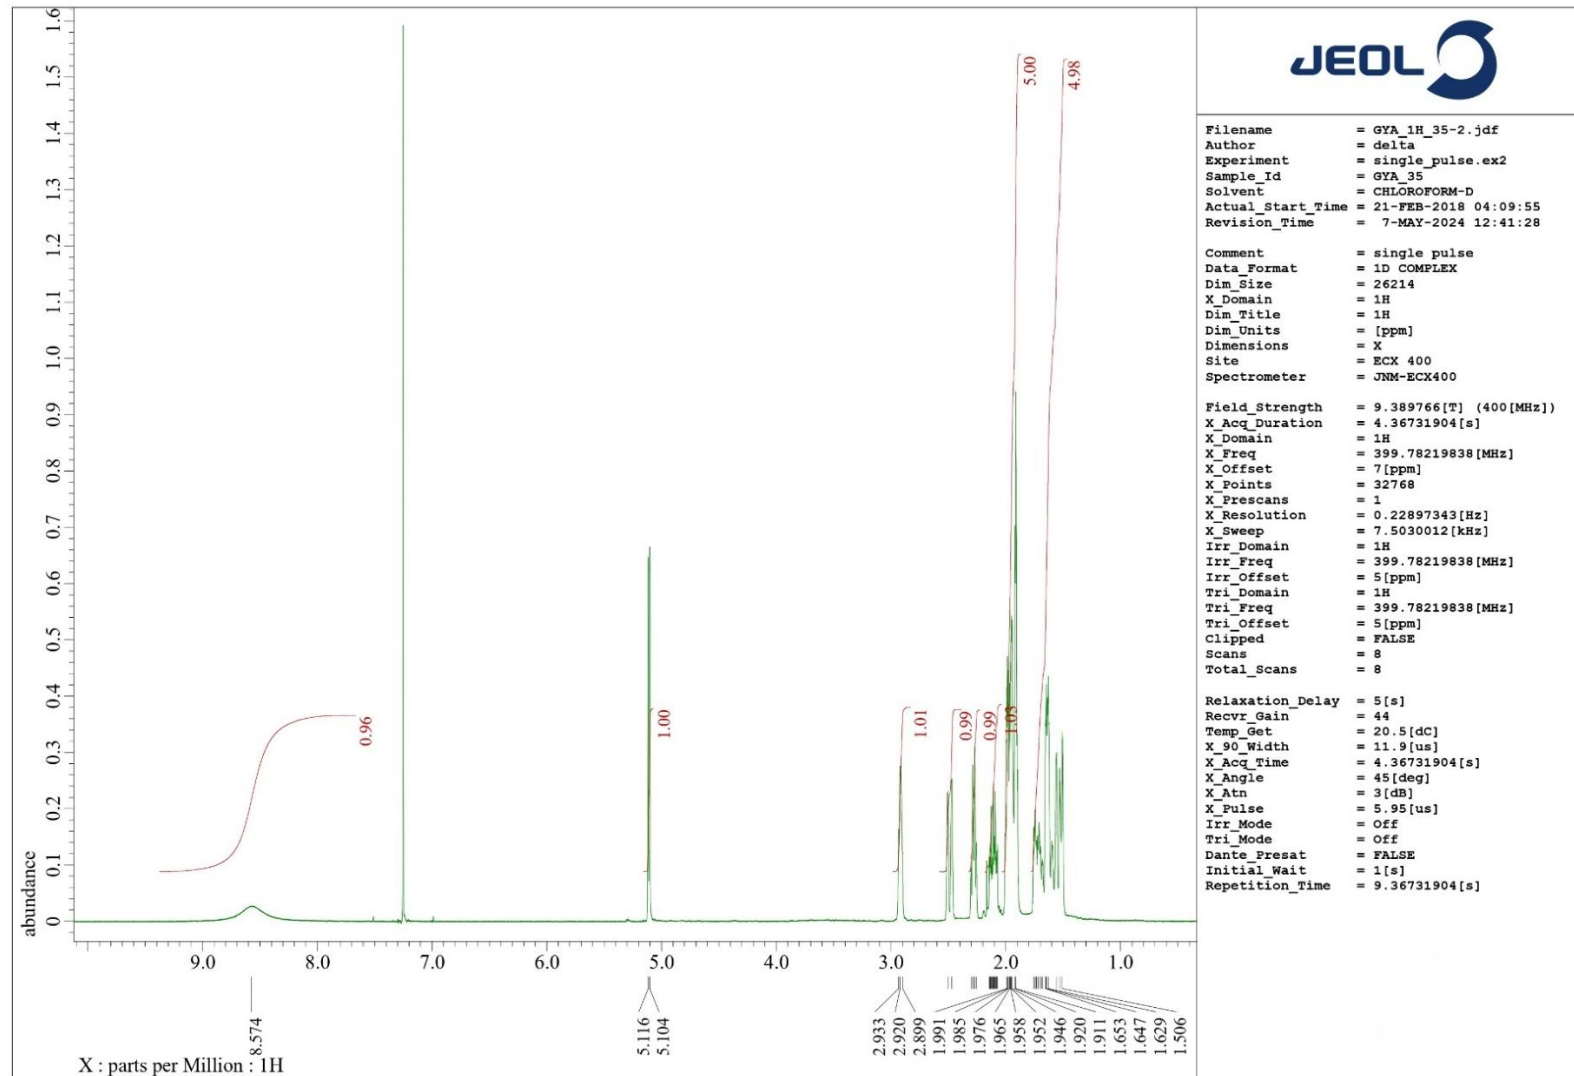

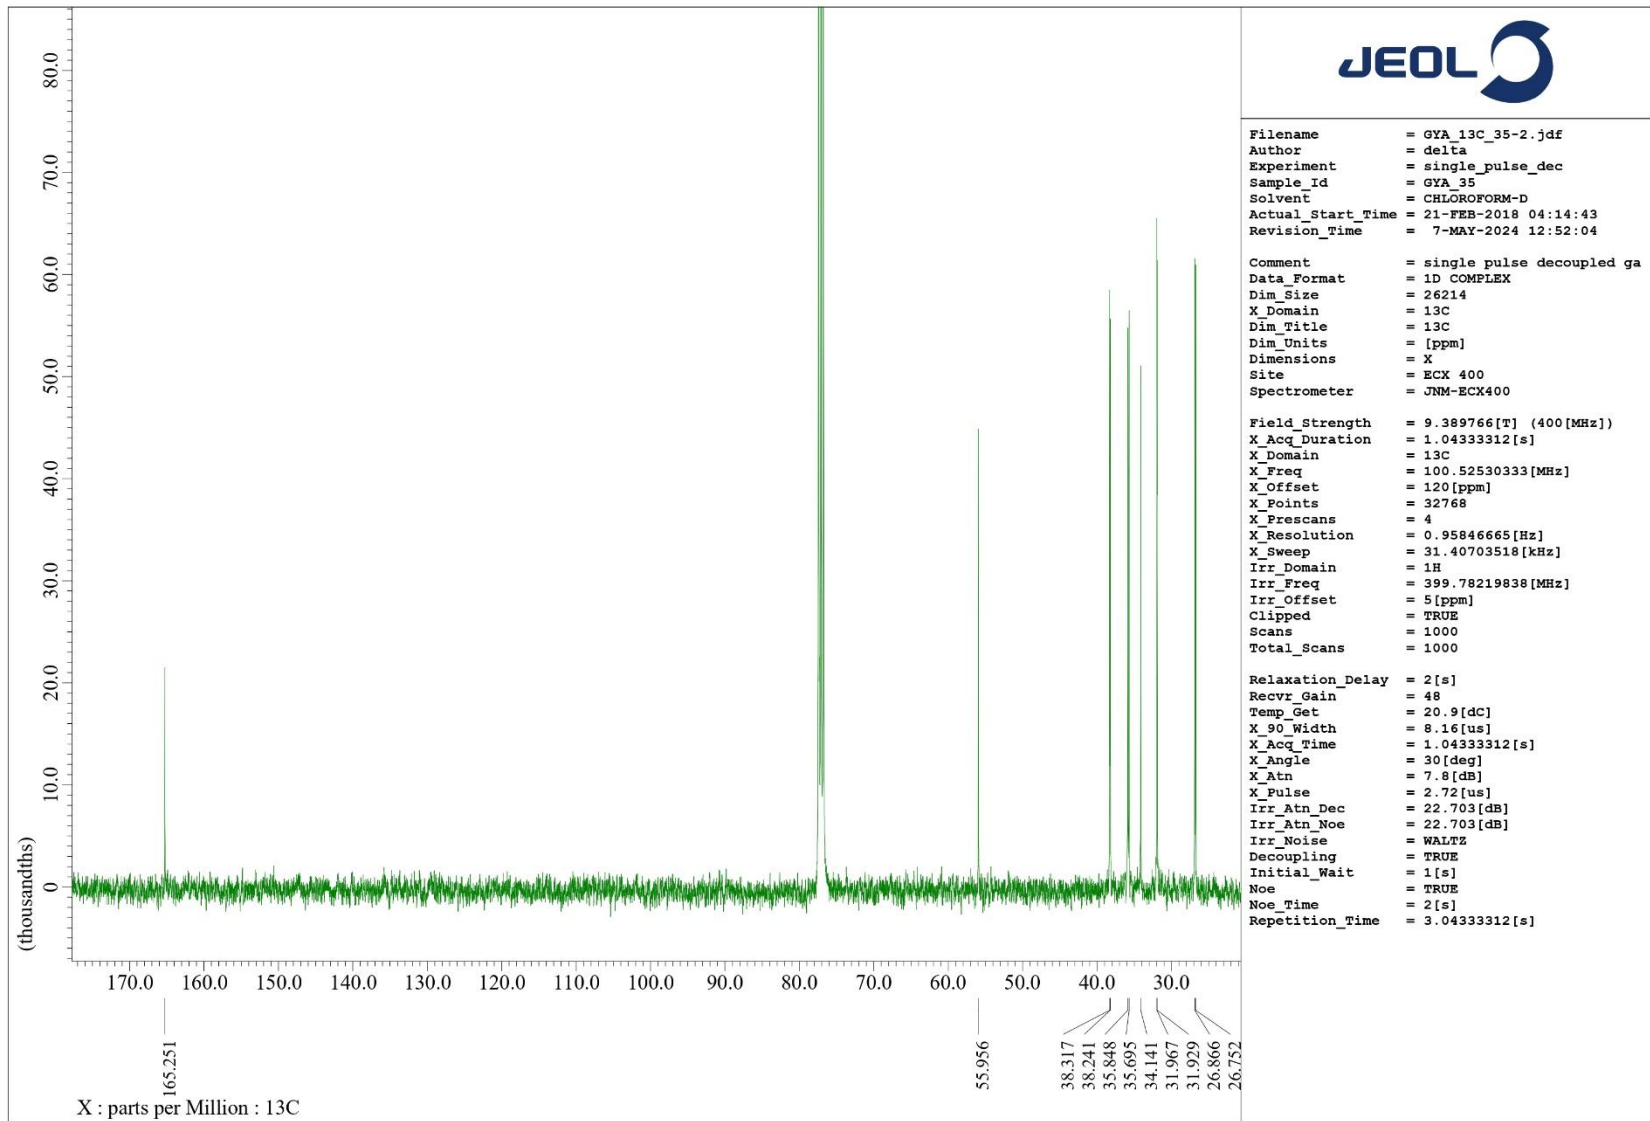

### 3.2. NMR spectra of 5-azidotricyclo[4.3.1.1<sup>3,8</sup>]undecane-4-one oxime (4)

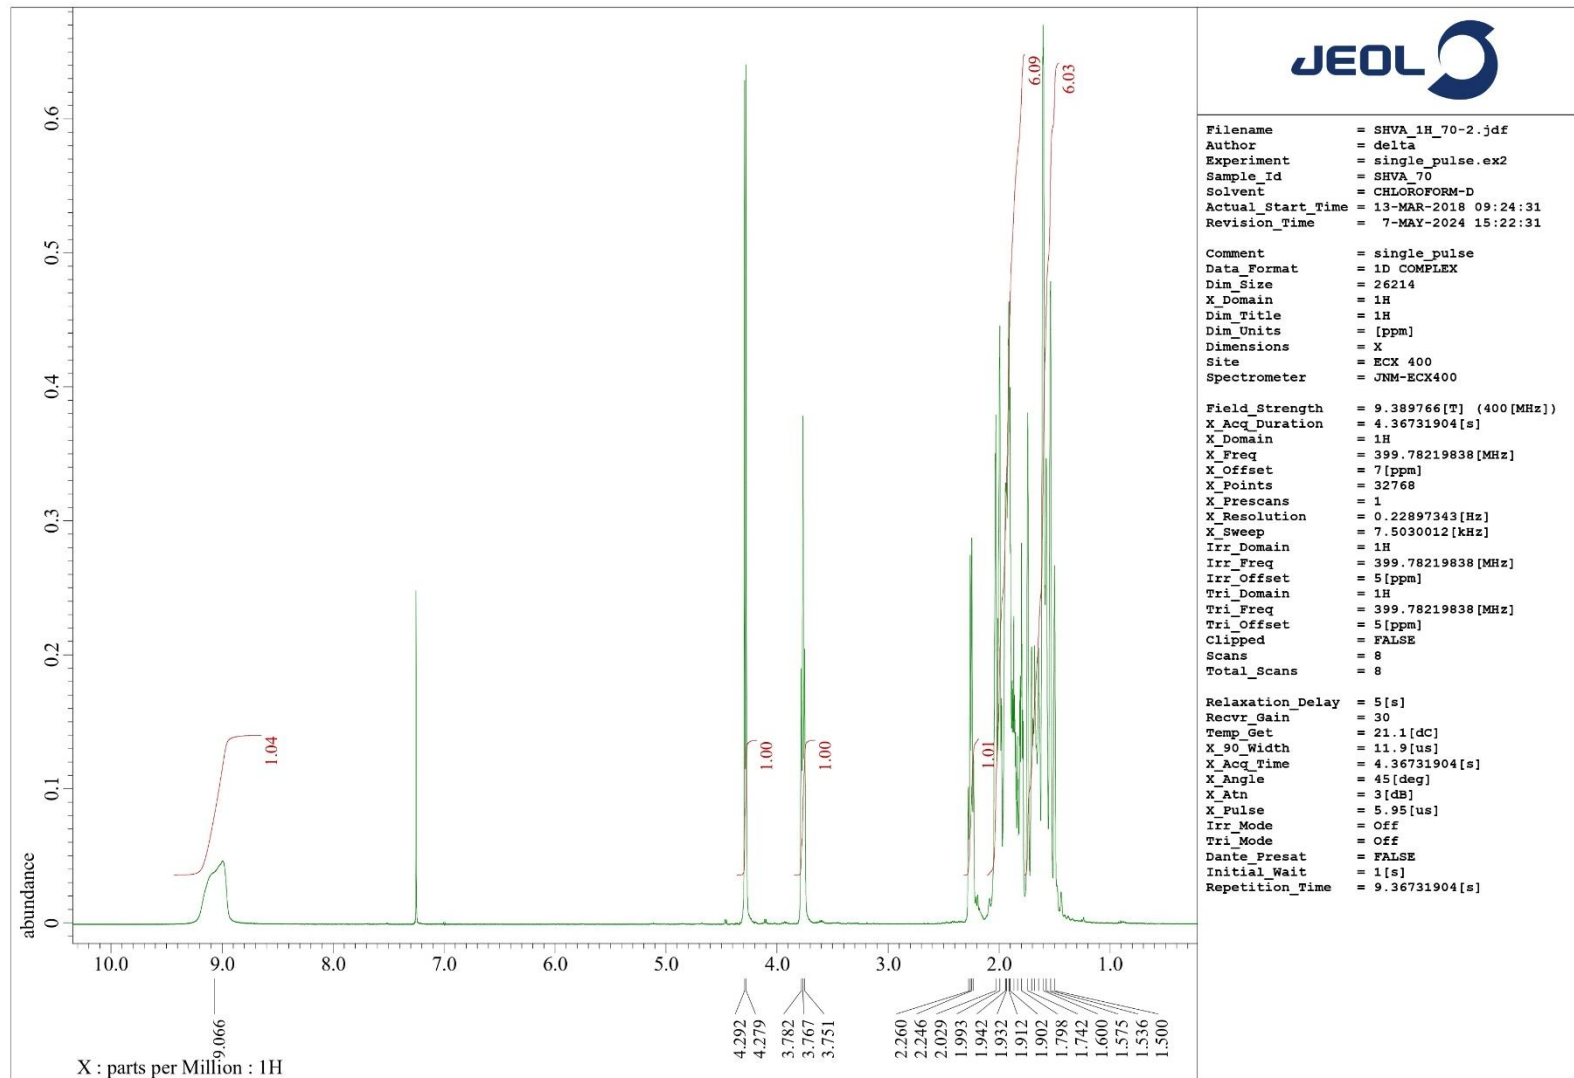

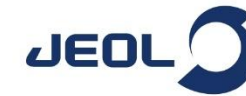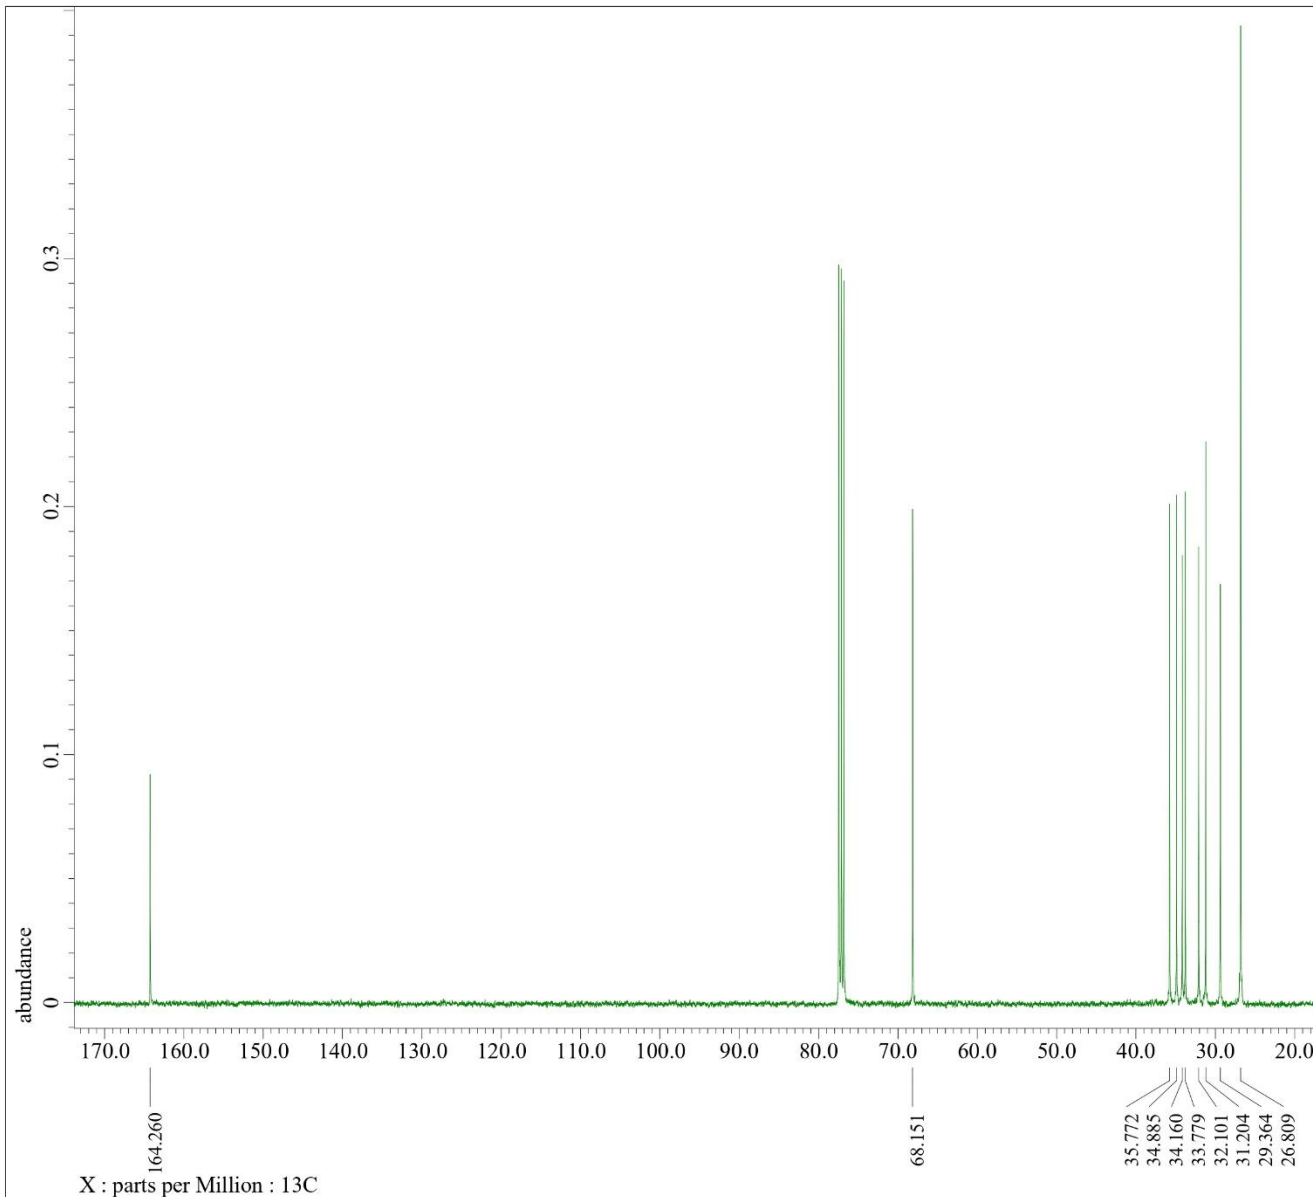

Filename = SHVA\_13C\_70-2.jdf  
Author = delta  
Experiment = single\_pulse\_dec  
Sample\_Id = SHVA\_70  
Solvent = CHLOROFORM-D  
Actual\_Start\_Time = 13-MAR-2018 09:28:13  
Revision\_Time = 7-MAY-2024 15:19:29

Comment = single pulse decoupled ga  
Data\_Format = 1D\_COMPLEX  
Dim\_Size = 26214  
X\_Domain = 13C  
Dim\_Title = 13C  
Dim\_Units = [ppm]  
Dimensions = X  
Site = ECX 400  
Spectrometer = JNM-ECX400

Field\_Strength = 9.389766[T] (400[MHz])  
X\_Acq\_Duration = 1.04333312[s]  
X\_Domain = 13C  
X\_Freq = 100.52530333[MHz]  
X\_Offset = 120 [ppm]  
X\_Points = 32768  
X\_Prescans = 4  
X\_Resolution = 0.95846665 [Hz]  
X\_Sweep = 31.40703518 [kHz]  
Irr\_Domain = 1H  
Irr\_Freq = 399.78219838 [MHz]  
Irr\_Offset = 5 [ppm]  
Clipped = FALSE  
Scans = 1000  
Total\_Scans = 1000

Relaxation\_Delay = 2 [s]  
Recvr\_Gain = 46  
Temp\_Get = 21.1 [dC]  
X\_90\_Width = 8.16 [us]  
X\_Acq\_Time = 1.04333312 [s]  
X\_Angle = 30 [deg]  
X\_Atn = 7.8 [dB]  
X\_Pulse = 2.72 [us]  
Irr\_Atn\_Dec = 22.703 [dB]  
Irr\_Atn\_Noise = 22.703 [dB]  
Irr\_Noise = WALTZ  
Decoupling = TRUE  
Initial\_Wait = 1 [s]  
Noe = TRUE  
Noe\_Time = 2 [s]  
Repetition\_Time = 3.04333312 [s]

### 3.3. NMR spectra of 5-(benzylamino)tricyclo[4.3.1.1<sup>3,8</sup>]undecan-4-one oxime (5)

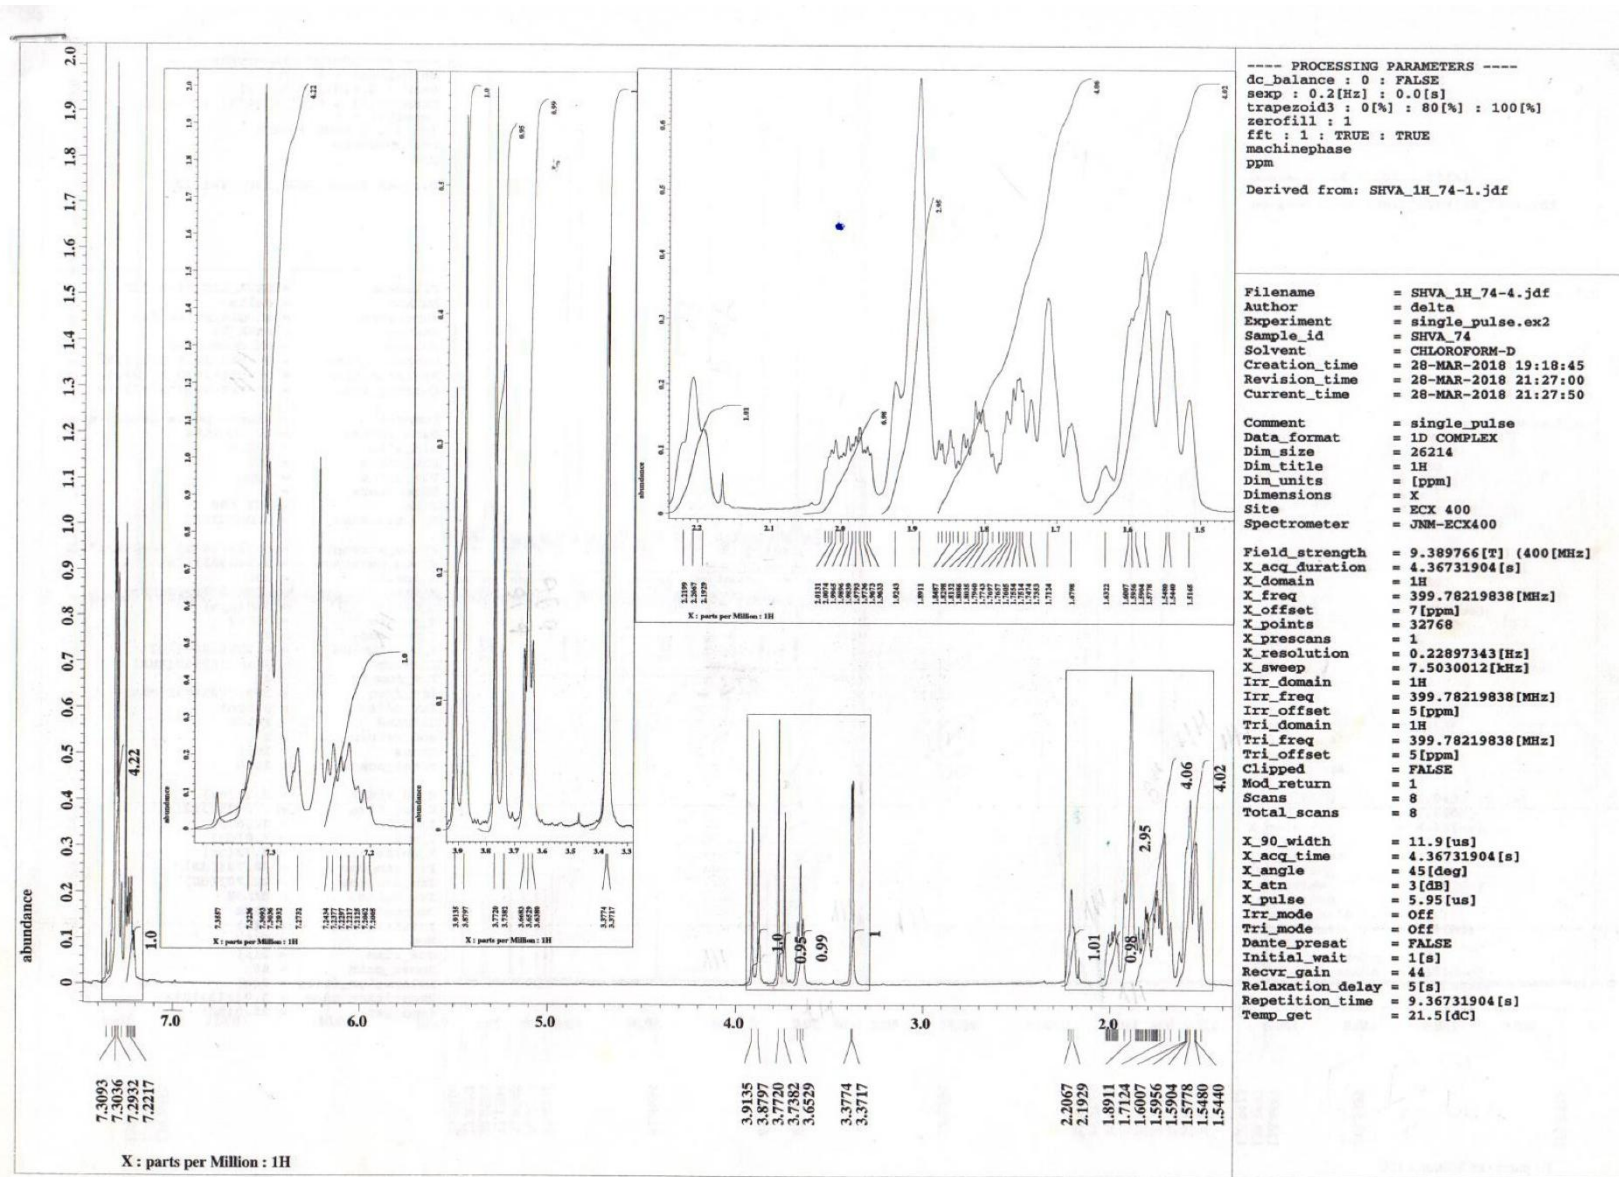

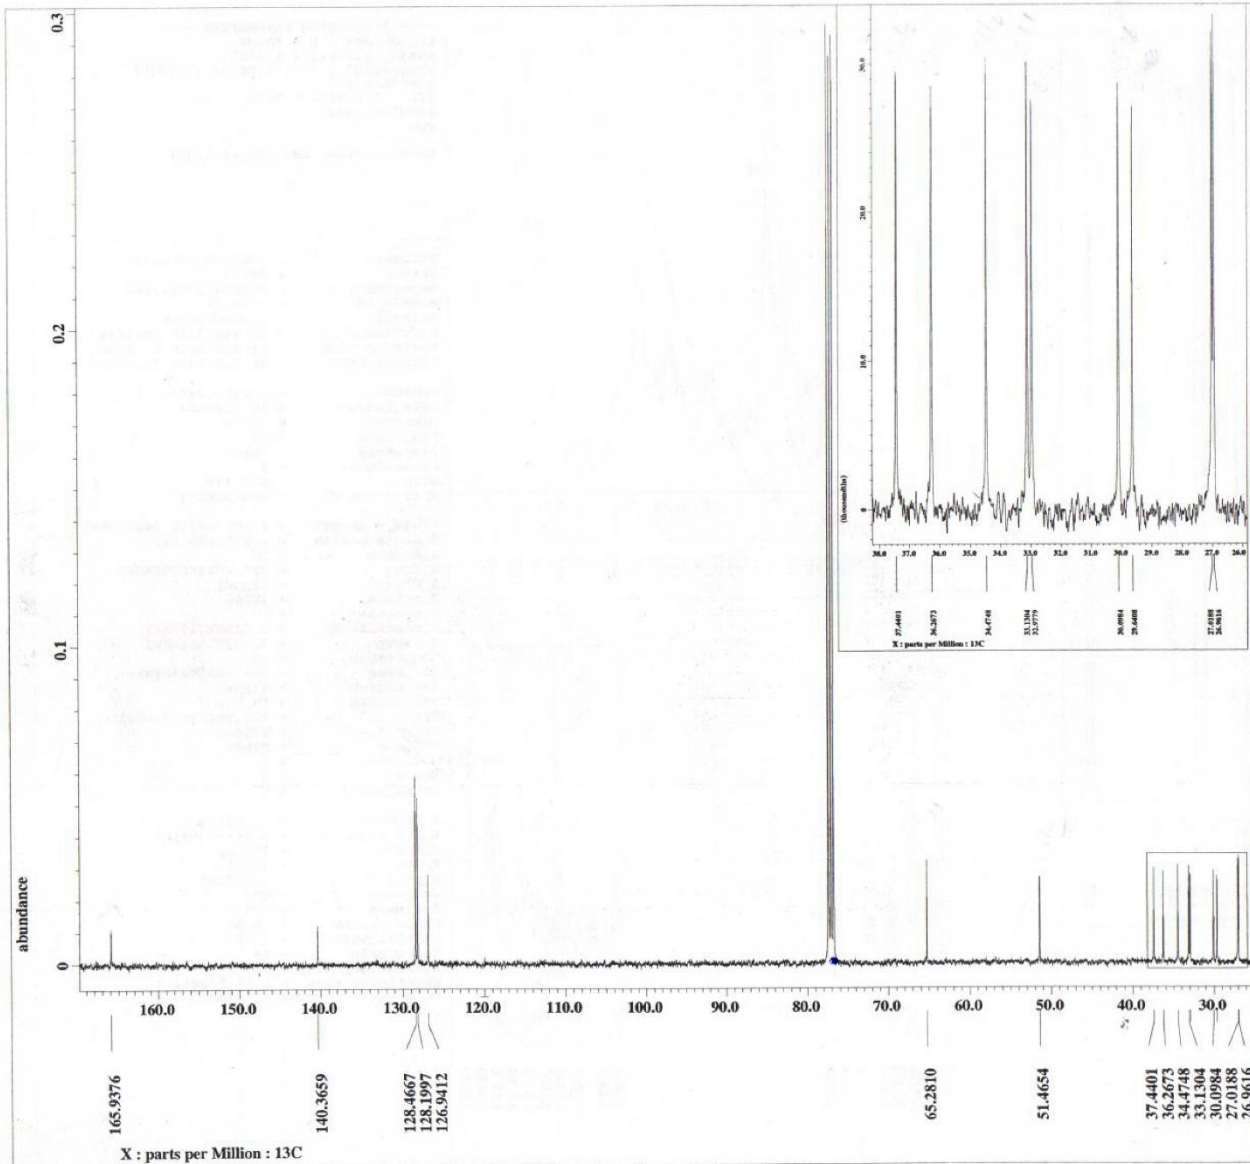

---- PROCESSING PARAMETERS ----  
 dc\_balance : 0 : FALSE  
 secp : 2.0[Hz] : 0.0[s]  
 trapezoid3 : 0[%] : 80[%]  
 zerofill : 1  
 fft : 1 : TRUE : TRUE  
 machinephase  
 ppm  
 Derived from: SHVA\_13C\_74-1.jdf

Filename = SHVA\_13C\_74-3.jdf  
 Author = delta  
 Experiment = single\_pulse\_dec  
 Sample\_id = SHVA\_74  
 Solvent = CHLOROFORM-D  
 Creation\_time = 28-MAR-2018 20:11:57  
 Revision\_time = 28-MAR-2018 21:27:59  
 Current\_time = 28-MAR-2018 21:28:19  
 Comment = single pulse decouple  
 Data\_format = 1D COMPLEX  
 Dim\_size = 26214  
 Dim\_title = 13C  
 Dim\_units = [ppm]  
 Dimensions = X  
 Site = ECX 400  
 Spectrometer = JNM-ECX400

Field\_strength = 9.389766[T] (400[MHz])  
 X\_acq\_duration = 1.04333312[s]  
 X\_domain = 13C  
 X\_freq = 100.52530333[MHz]  
 X\_offset = 120[ppm]  
 X\_points = 32768  
 X\_prescans = 4  
 X\_resolution = 0.95846665[Hz]  
 X\_sweep = 31.40703518[kHz]  
 Irr\_domain = 1H  
 Irr\_freq = 399.78219838[MHz]  
 Irr\_offset = 5[ppm]  
 Clipped = FALSE  
 Mod\_return = 1  
 Scans = 1000  
 Total\_scans = 1000  
 X\_90\_width = 8.16[us]  
 X\_acq\_time = 1.04333312[s]  
 X\_angle = 30[deg]  
 X\_atn = 7.8[dB]  
 X\_pulse = 2.72[us]  
 Irr\_atn\_dec = 22.703[dB]  
 Irr\_atn\_noe = 22.703[dB]  
 Irr\_noise = WALTZ  
 Decoupling = TRUE  
 Initial\_wait = 1[s]  
 Noe = TRUE  
 Noe\_time = 2[s]  
 Recvr\_gain = 46  
 Relaxation\_delay = 2[s]  
 Repetition\_time = 3.04333312[s]  
 Temp\_get = 21.9[dc]

### 3.4. NMR spectra of tricyclo[4.3.1.1<sup>3,8</sup>]undecane-4-amine hydrochloride (6)

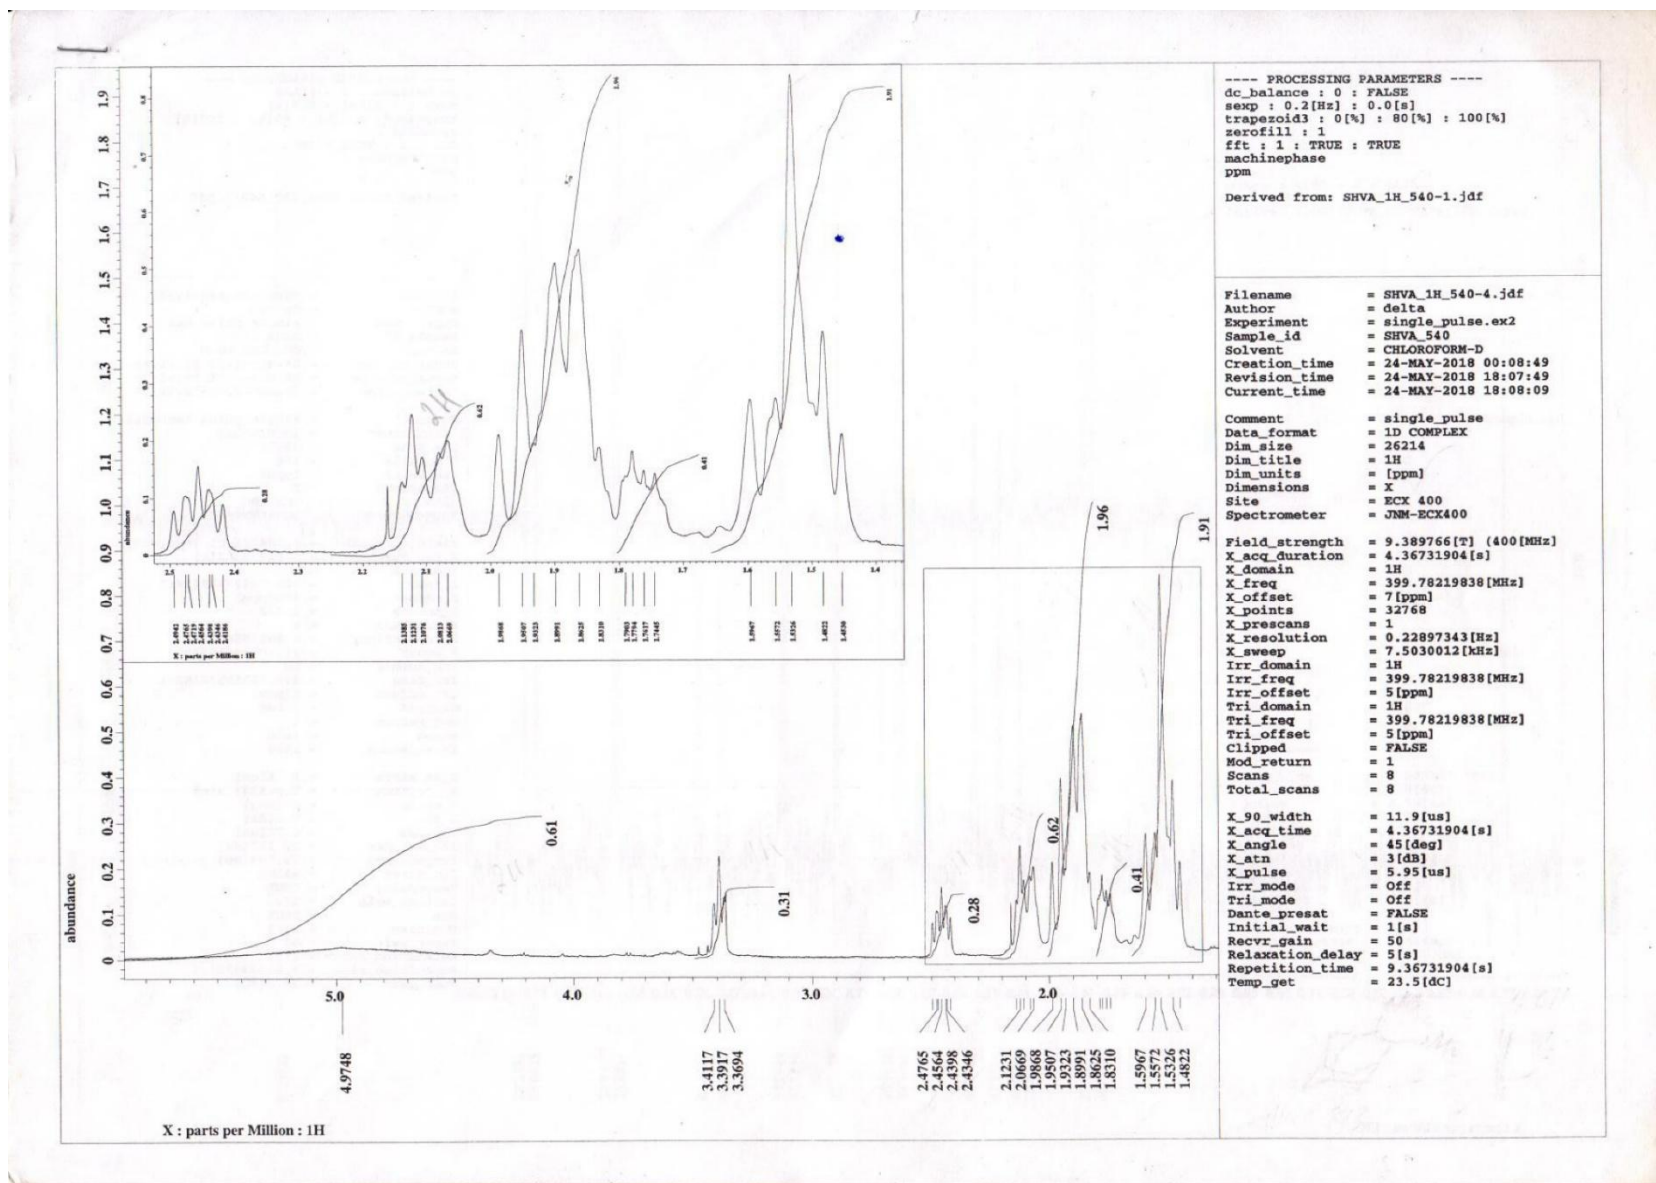

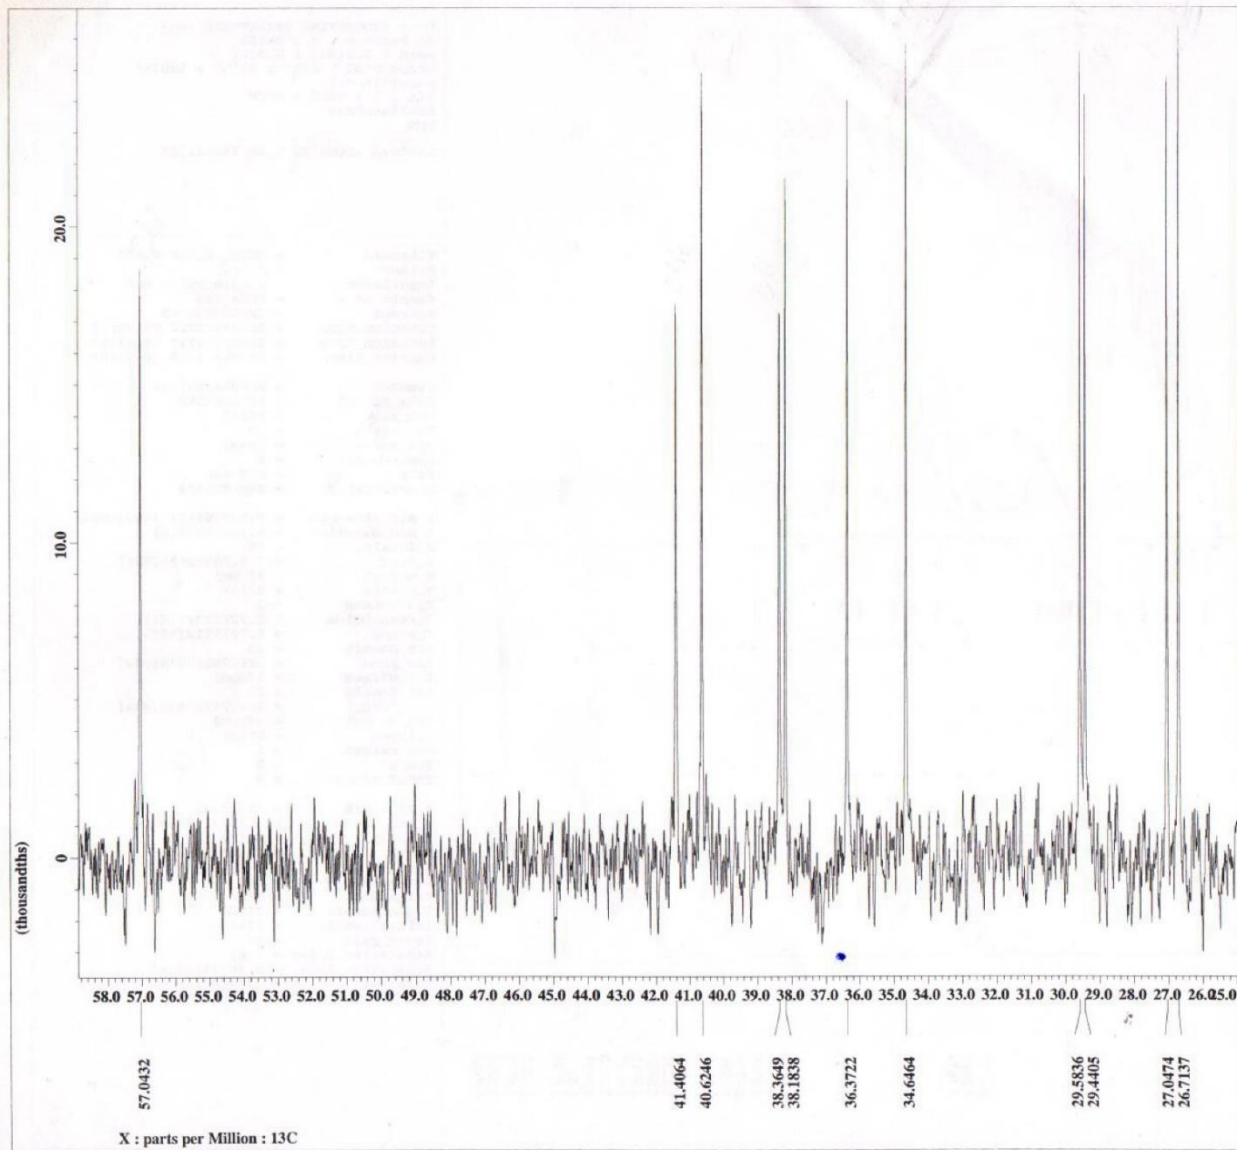

```

---- PROCESSING PARAMETERS ----
dc_balance : 0 : FALSE
sexp : 2.0[Hz] : 0.0[s]
trapezoid3 : 0[%] : 80[%] : 100[%]
zerofill : 1
fft : 1 : TRUE : TRUE
machinephase
ppm
Derived from: SHVA_13C_540-1.jdf

```

```

Filename      = SHVA_13C_540-4.jdf
Author       = delta
Experiment   = single_pulse_dec
Sample_id    = SHVA_540
Solvent      = CHLOROFORM-D
Creation_time = 24-MAY-2018 01:01:59
Revision_time = 24-MAY-2018 18:08:23
Current_time = 24-MAY-2018 18:08:36

Comment      = single pulse decouple
Data_format  = 1D COMPLEX
Dim_size     = 26214
Dim_title    = 13C
Dim_units    = [ppm]
Dimensions   = X
Site         = ECX 400
Spectrometer = JNM-ECX400

Field_strength = 9.389766[T] (400[MHz])
X_acq_duration = 1.04333312[s]
X_domain      = 13C
X_freq       = 100.52530333[MHz]
X_offset     = 120[ppm]
X_points     = 32768
X_prescans   = 4
X_resolution = 0.95846665[Hz]
X_sweep      = 31.40703518[kHz]
Irr_domain   = 1H
Irr_freq     = 399.78219838[MHz]
Irr_offset   = 5[ppm]
Clipped      = FALSE
Mod_return   = 1
Scans        = 1000
Total_scans  = 1000

X_90_width   = 8.16[us]
X_acq_time   = 1.04333312[s]
X_angle      = 30[deg]
X_atn        = 7.8[db]
X_pulse      = 2.72[us]
Irr_atn_dec  = 22.703[db]
Irr_atn_noe  = 22.703[db]
Irr_noise    = WALTZ
Decoupling   = TRUE
Initial_wait = 1[s]
Noe          = TRUE
Noe_time     = 2[s]
Recvr_gain   = 50
Relaxation_delay = 2[s]
Repetition_time = 3.04333312[s]
Temp_get     = 23.6[dc]

```

### 3.5. NMR spectra of 5-azidotricyclo[4.3.1.1<sup>3,8</sup>]undecan-4-amine hydrochloride (7)

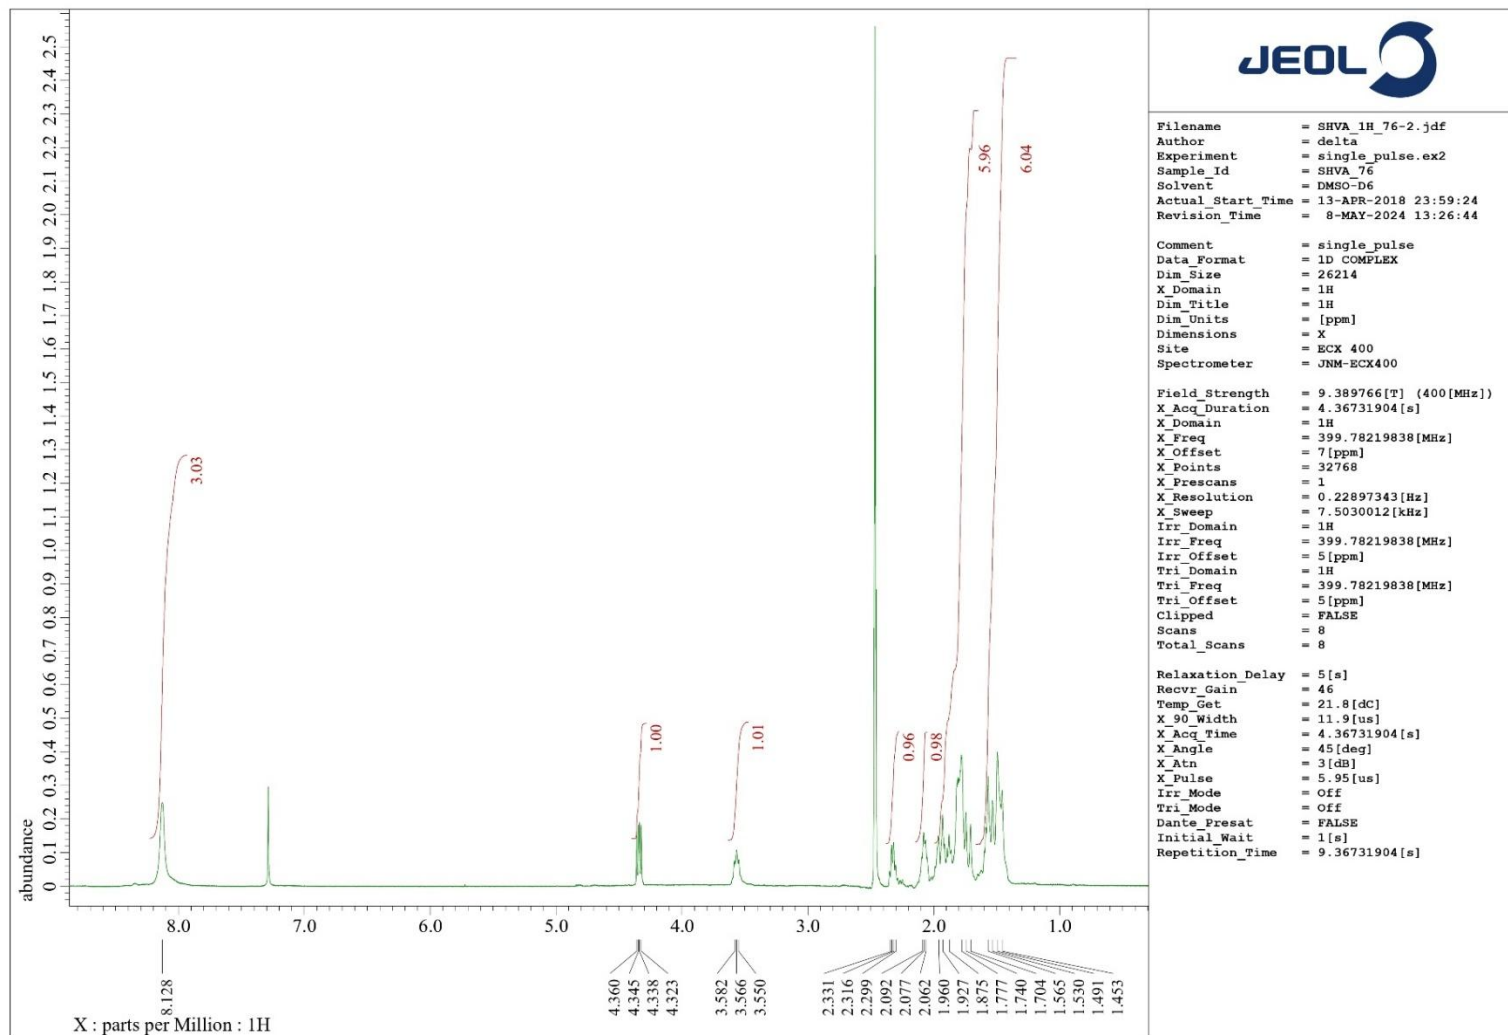

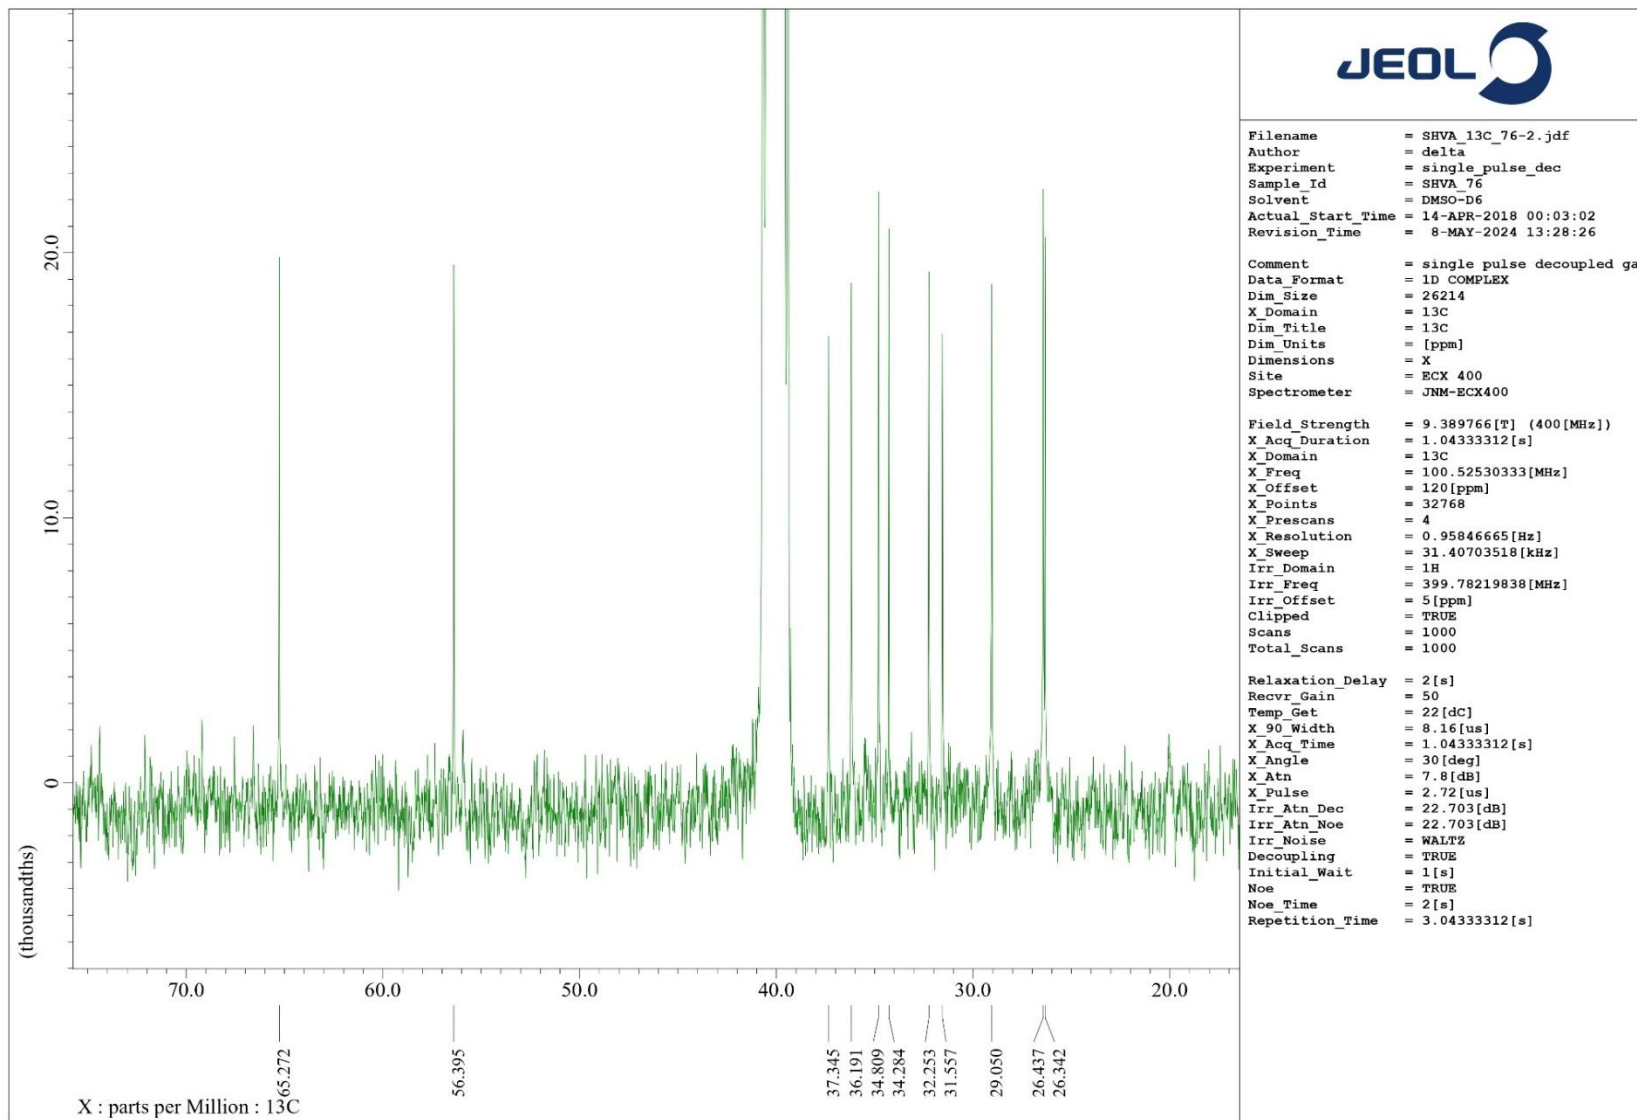

### 3.6. NMR spectra of *trans/cis*-4,5-diaminohomoadamantane dihydrochloride **8a,b**

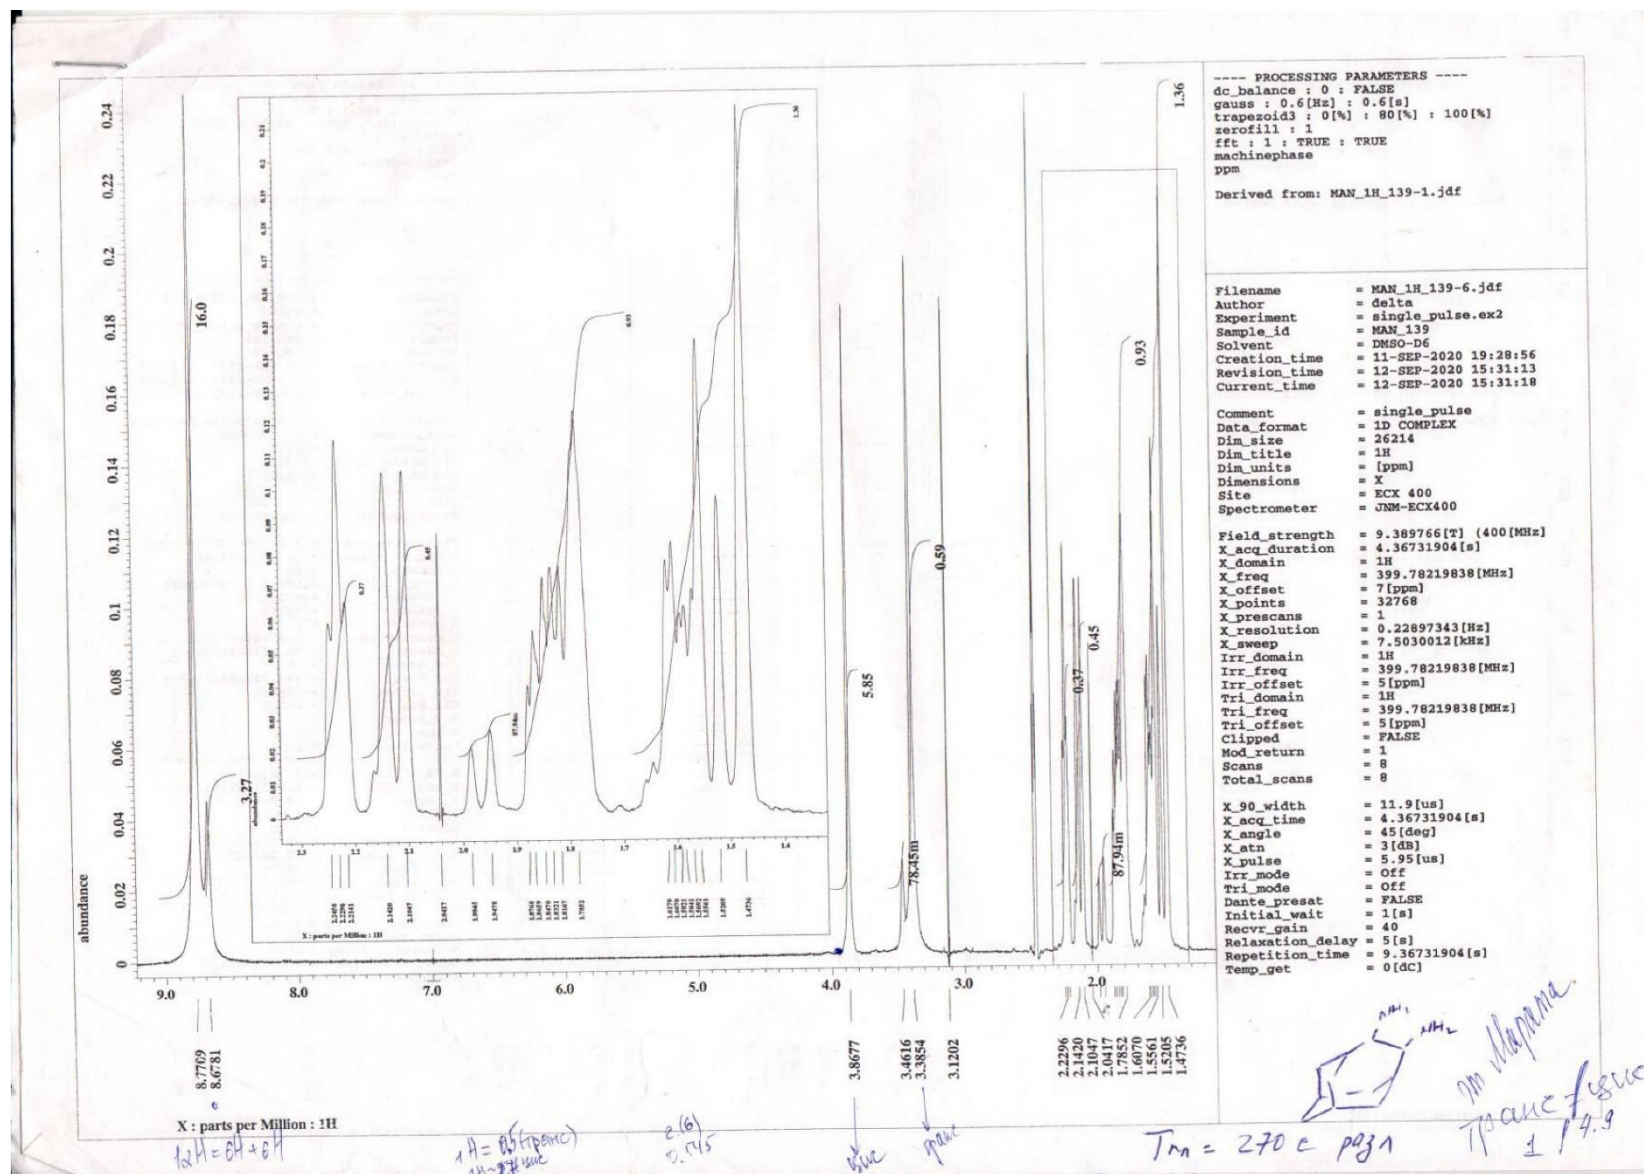

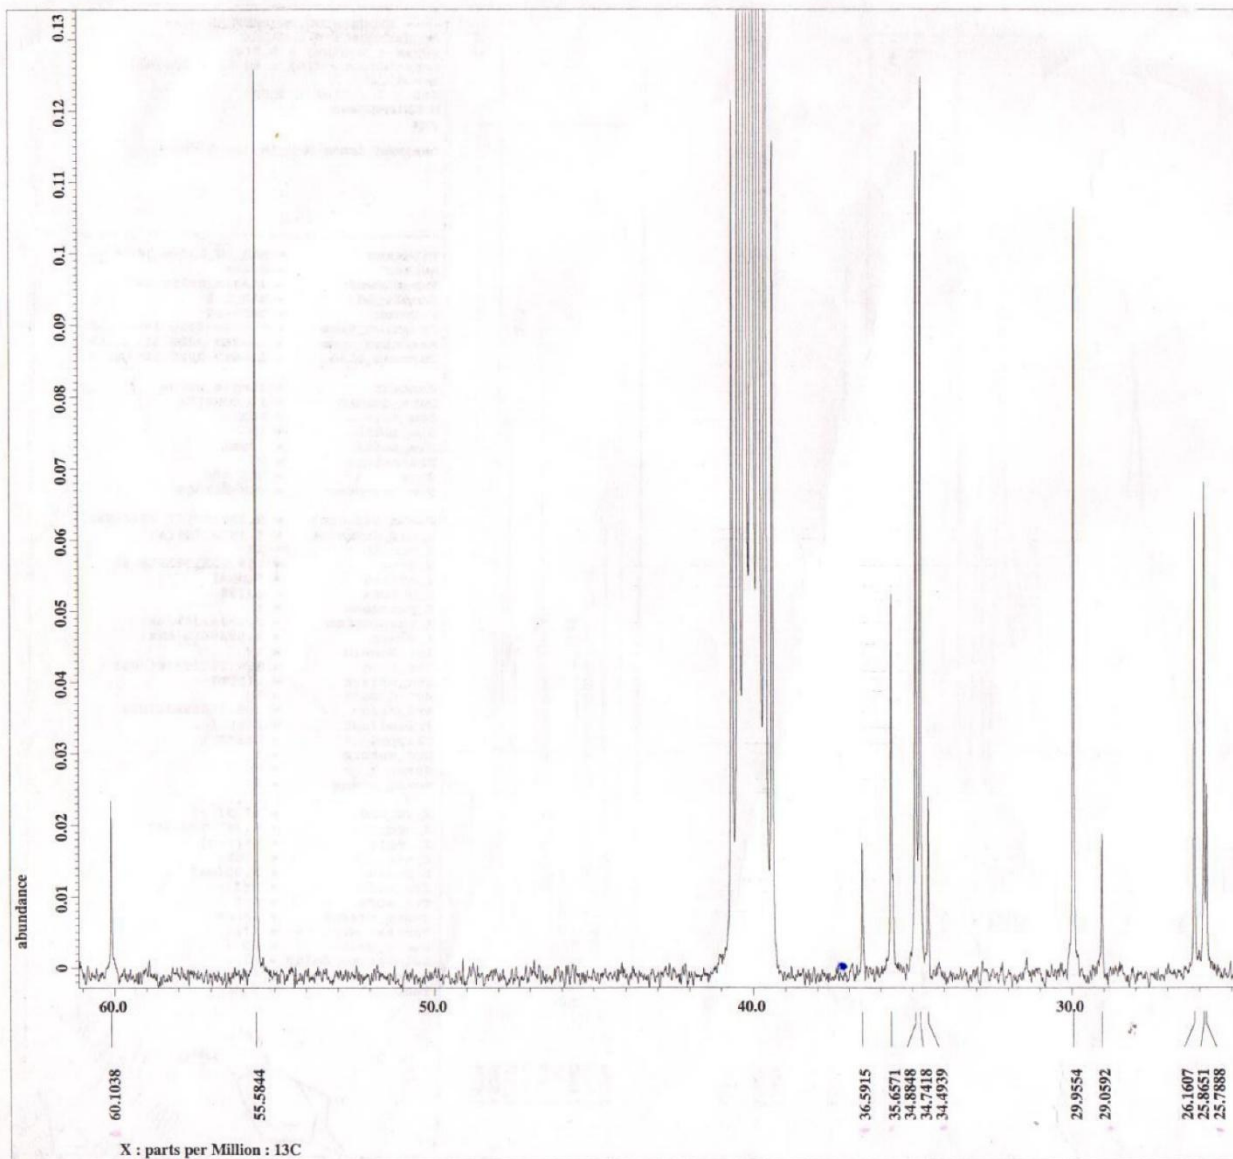

```

---- PROCESSING PARAMETERS ----
dc_balance : 0 : FALSE
sexp : 2.0[Hz] : 0.0[s]
trapezoid3 : 0[%] : 80[%] : 100[%]
zerofill : 1
fft : 1 : TRUE : TRUE
machinephase
ppm

```

Derived from: MAN\_13C\_139-1.jdf

```

Filename      = MAN_13C_139-3.jdf
Author       = delta
Experiment   = single_pulse_dec
Sample_id    = MAN_139
Solvent      = DMSO-D6
Creation_time = 11-SEP-2020 20:22:57
Revision_time = 12-SEP-2020 15:31:39
Current_time  = 12-SEP-2020 15:31:54

```

```

Comment      = single pulse decouple
Data_format   = 1D COMPLEX
Dim_size      = 26214
Dim_title     = 13C
Dim_units     = [ppm]
Dimensions    = X
Site          = ECX 400
Spectrometer  = JNM-ECX400

```

```

Field_strength = 9.389766[T] (400[MHz])
X_acq_duration = 1.04333312[s]
X_domain       = 13C
X_freq         = 100.52530333[MHz]
X_offset       = 120[ppm]
X_points       = 32768
X_prescans     = 4
X_resolution   = 0.95846665[Hz]
X_sweep        = 31.40703518[kHz]
Irr_domain     = 1H
Irr_freq       = 399.78219838[MHz]
Irr_offset     = 5[ppm]
Clipped        = FALSE
Mod_return     = 1
Scans          = 1000
Total_scans    = 1000

```

```

X_90_width    = 8.16[us]
X_acq_time     = 1.04333312[s]
X_angle        = 30[deg]
X_atn          = 7.8[dB]
X_pulse        = 2.72[us]
Irr_atn_dec    = 22.703[dB]
Irr_atn_noe    = 22.703[dB]
Irr_noise      = WALTZ
Decoupling     = TRUE
Initial_wait   = 1[s]
Noe            = TRUE
Noe_time       = 2[s]
Recvr_gain     = 48
Relaxation_delay = 2[s]
Repetition_time = 3.04333312[s]
Temp_get       = 0 [dC]

```

### 3.7. NMR spectra of *trans*-4,5-diaminohomoadamantane dihydrochloride (**8a**)

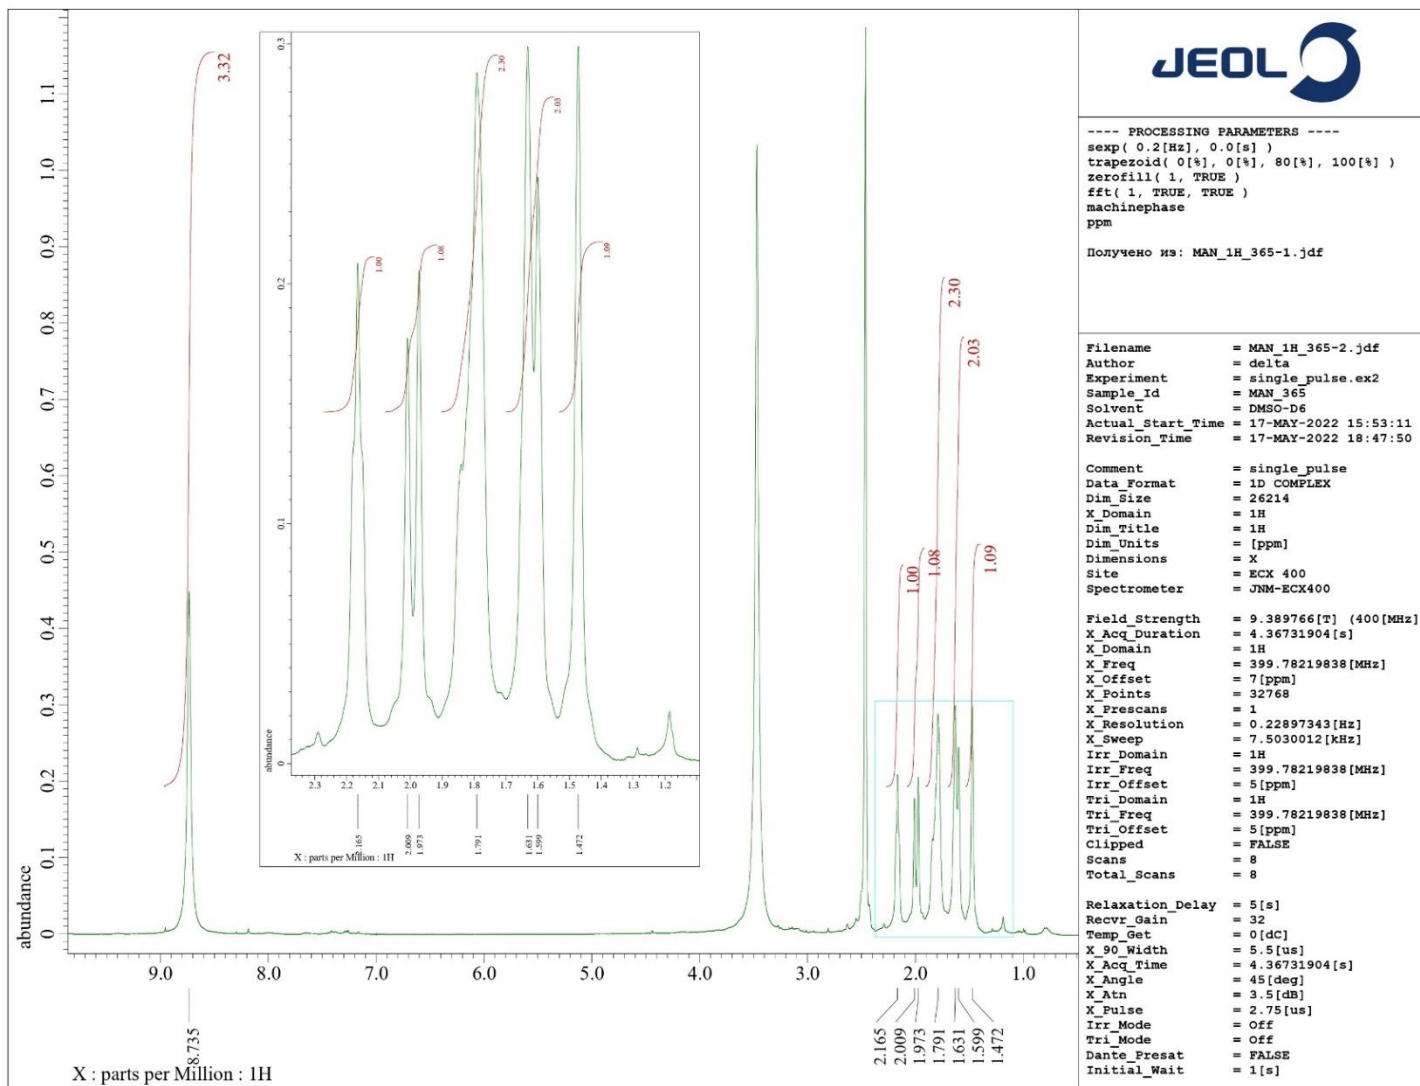

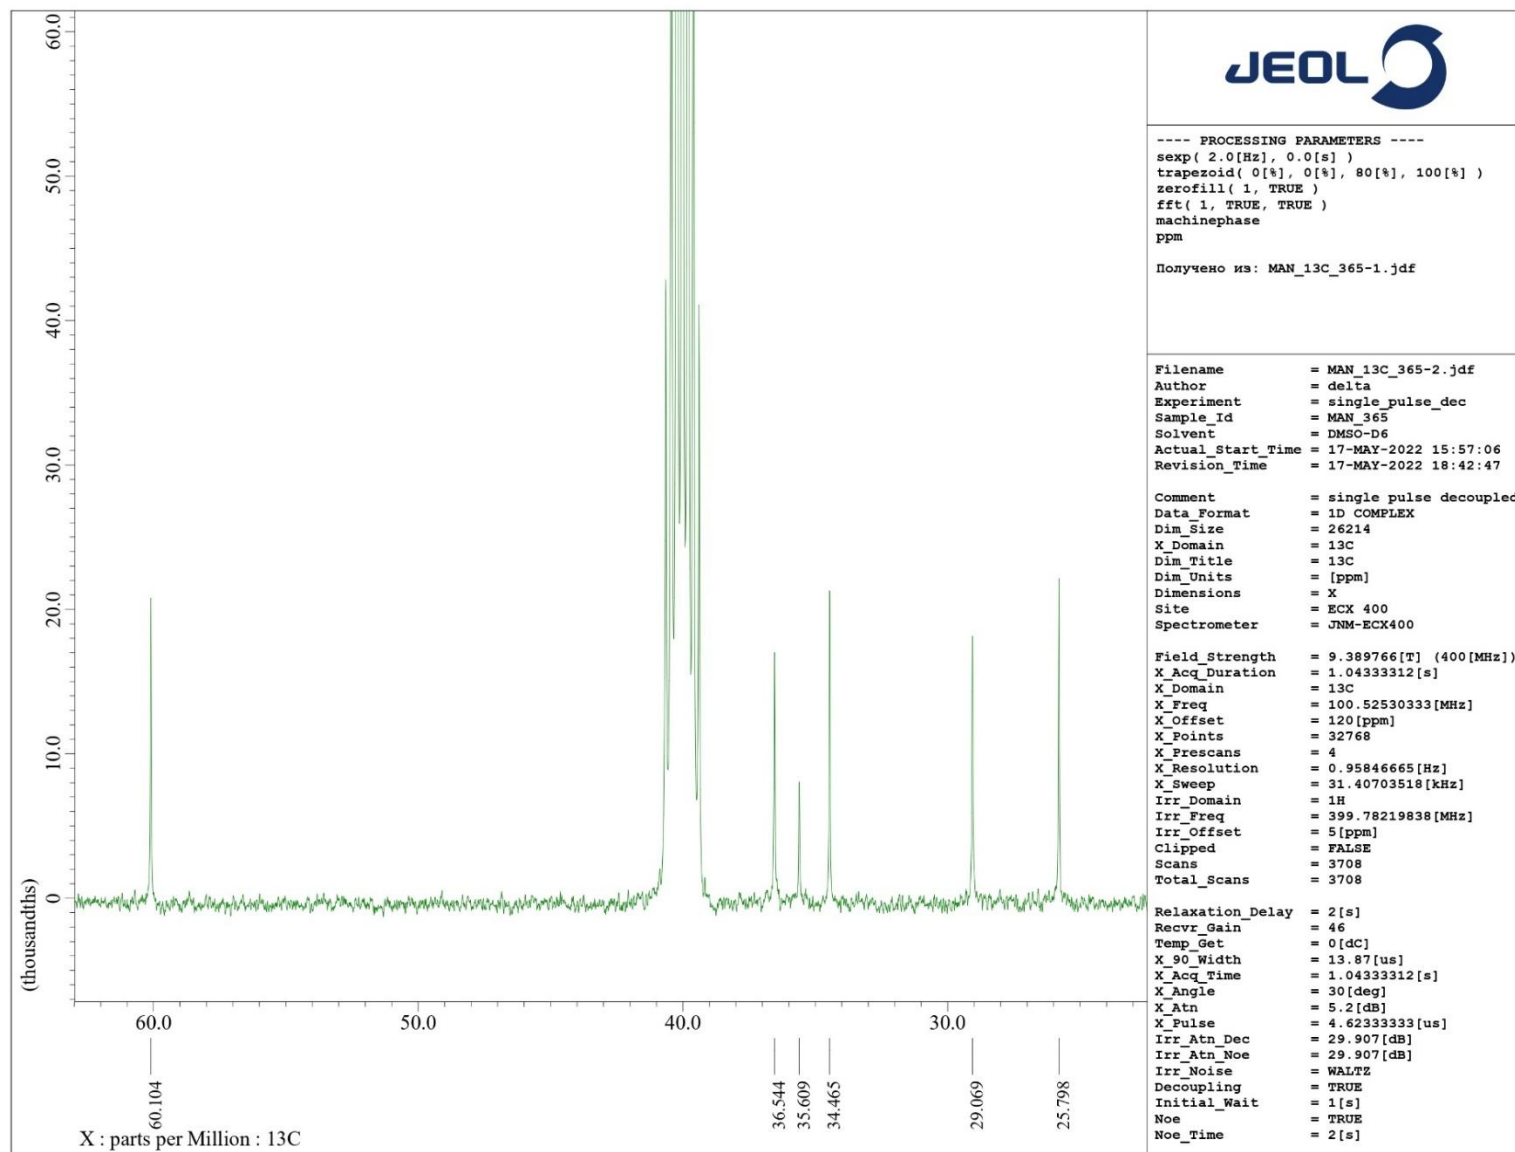

### 3.8. NMR spectra of *tert*-butyl 5-azatetracyclo[5.3.1.1.1<sup>3,9</sup>.0<sup>4,6</sup>]dodecane-5-carboxylate (10)

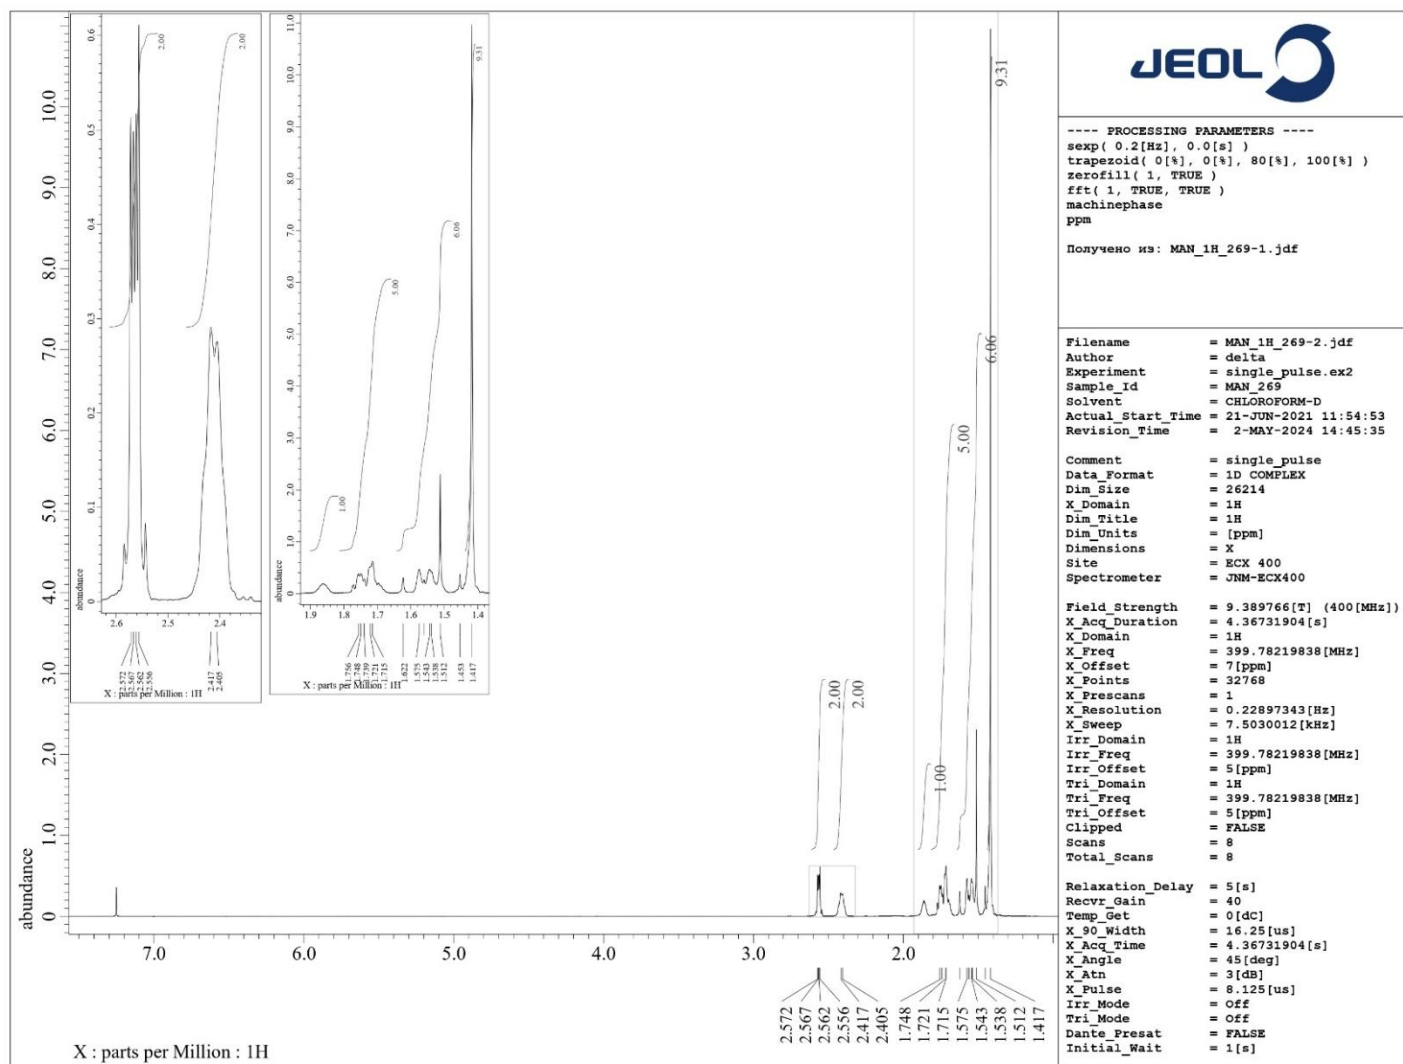

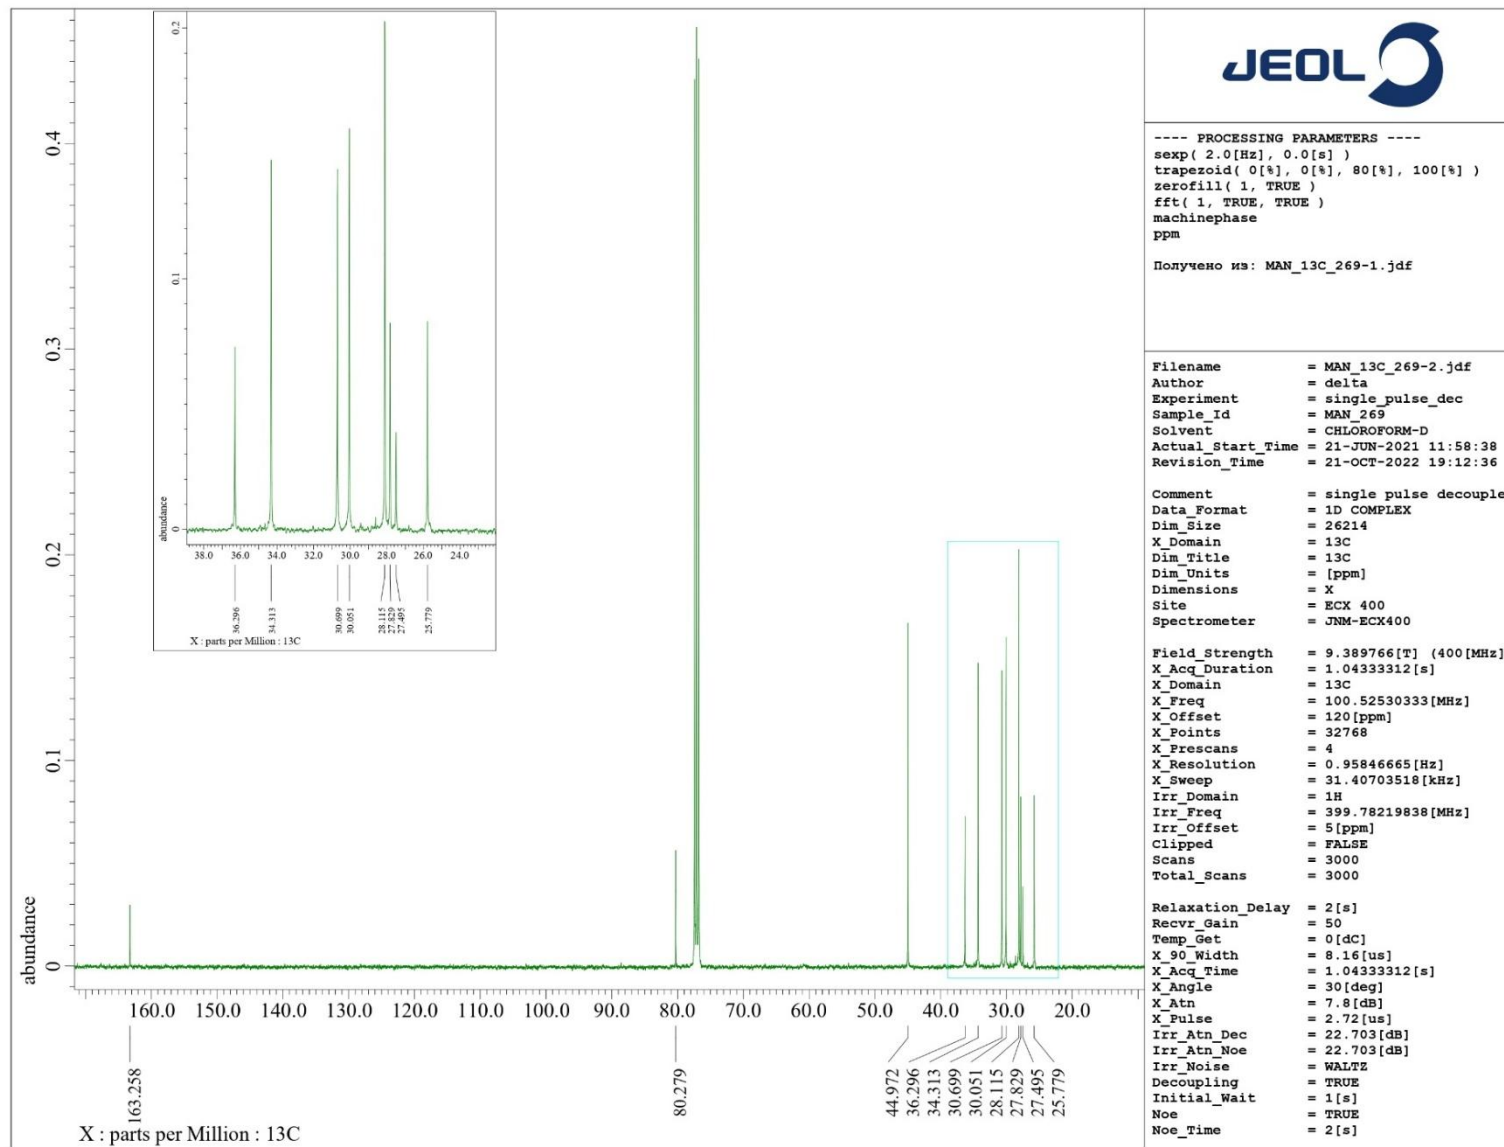

### 3.9. NMR spectra of *cis*-5-*p*-tosyl-5-azatetracyclo[5.3.1.1<sup>3,9</sup>.0<sup>4,6</sup>]dodecane (**11**)

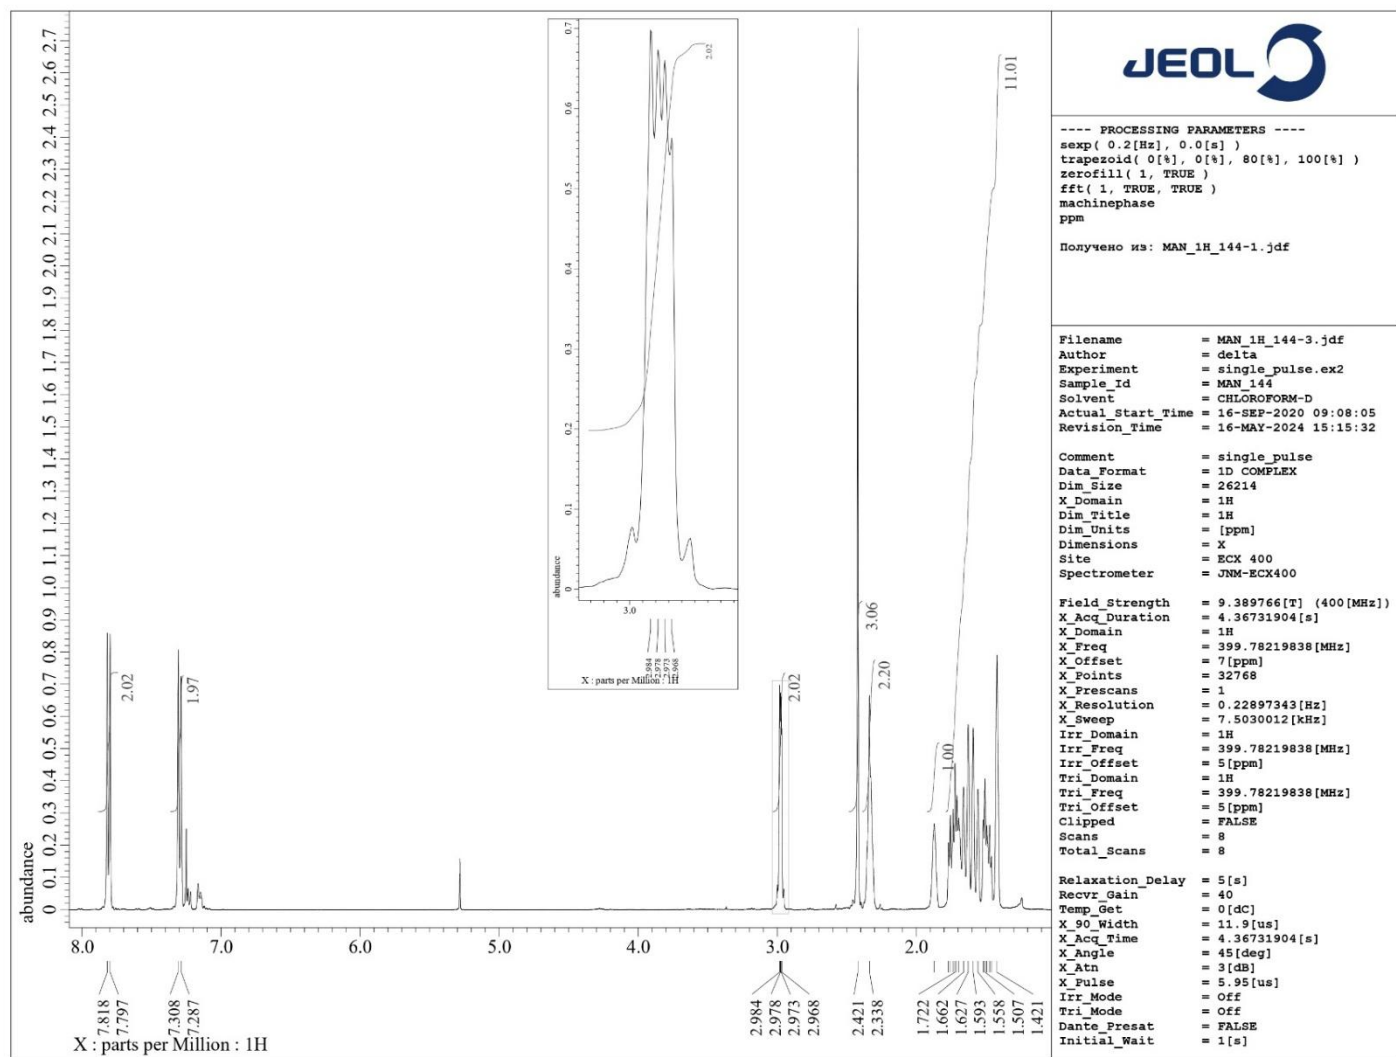

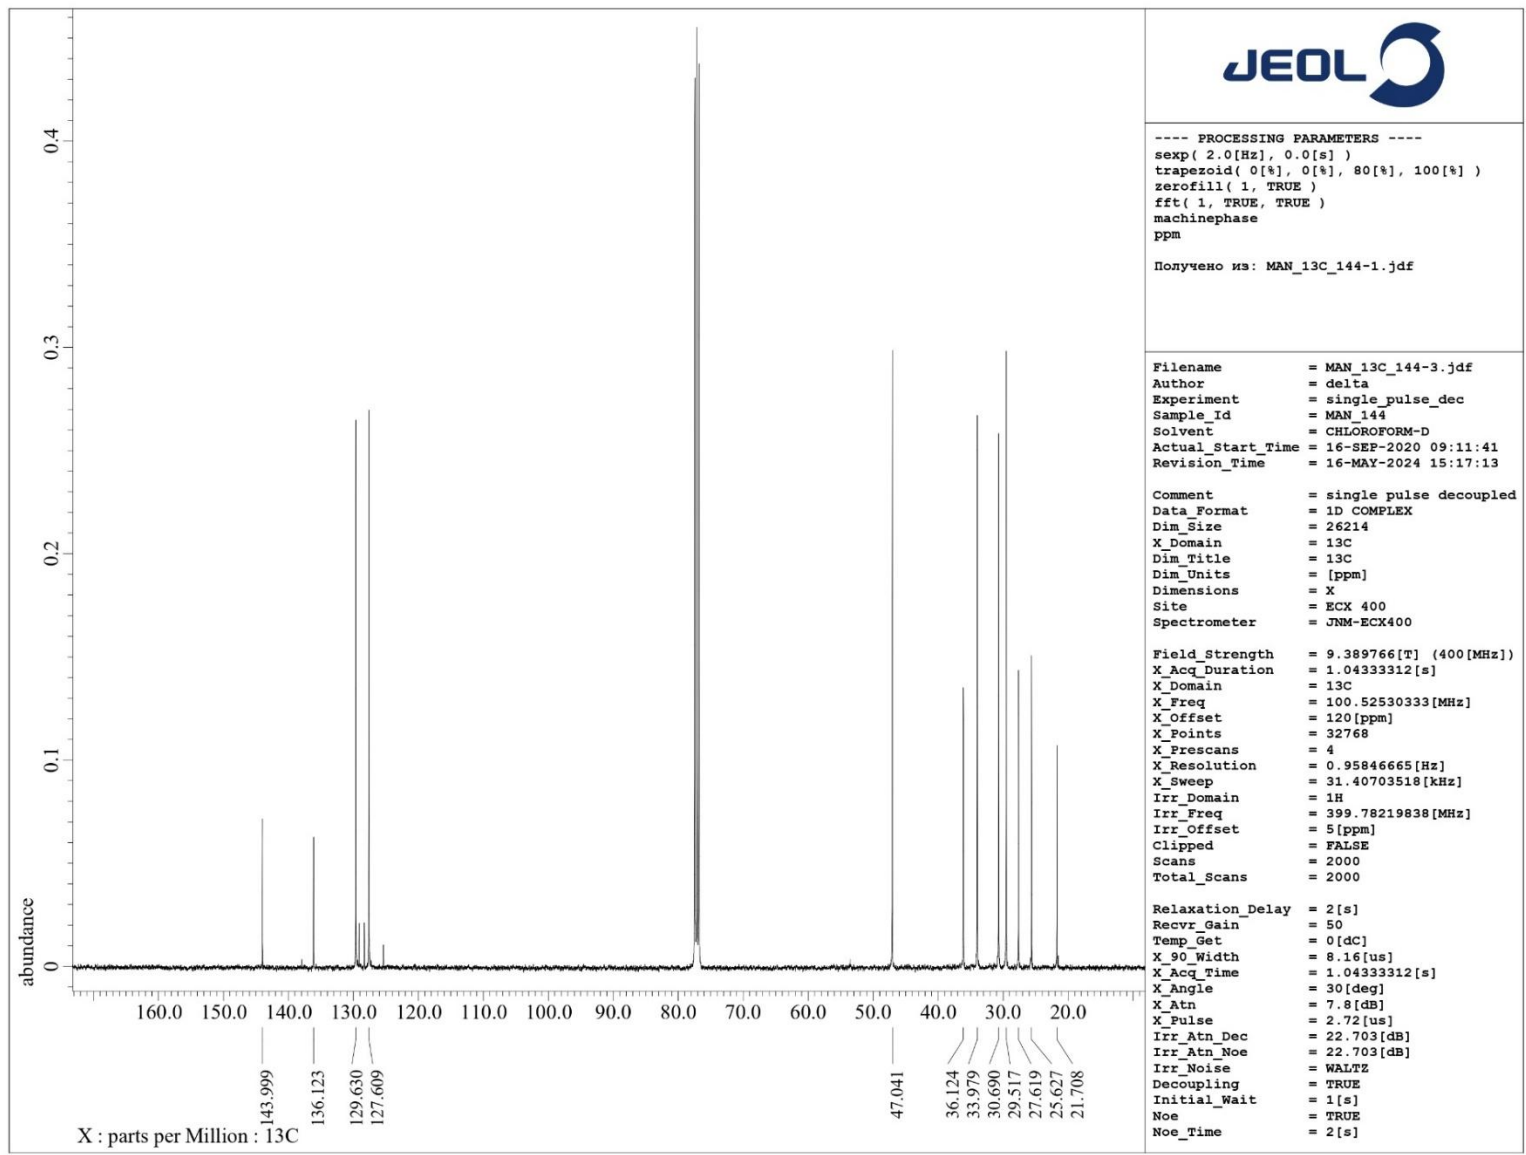

### 3.10. NMR spectra of *cis*-5-((trifluoromethyl)sulfonyl)-5-azatetracyclo[5.3.1.1<sup>3,9</sup>.0<sup>4,6</sup>]dodecane (12)

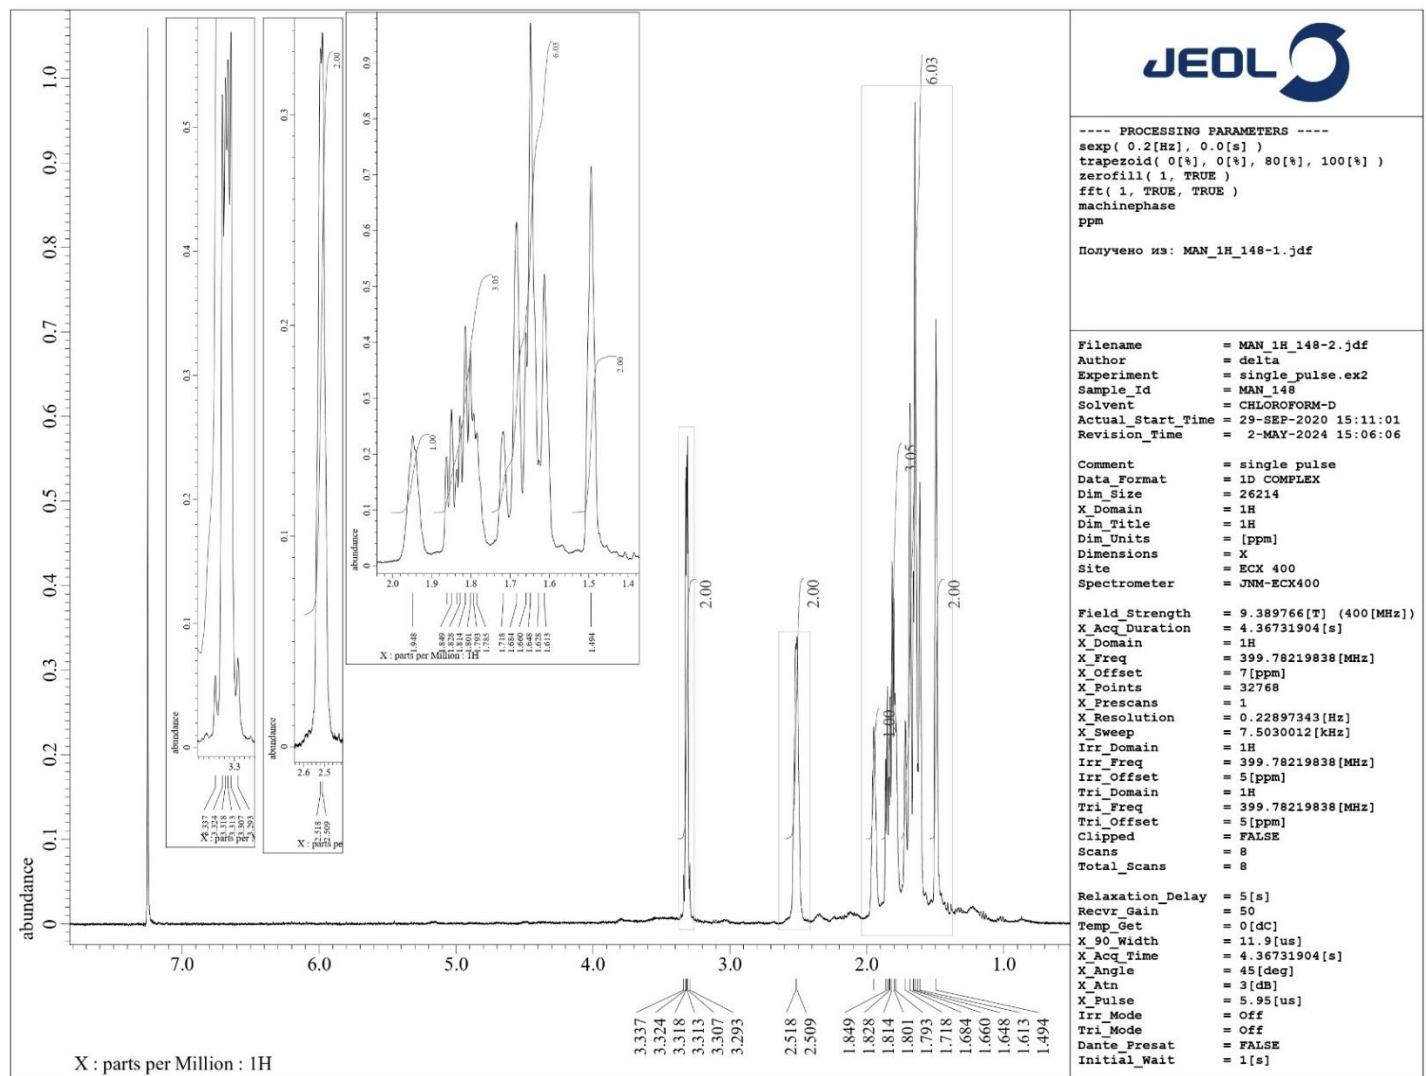

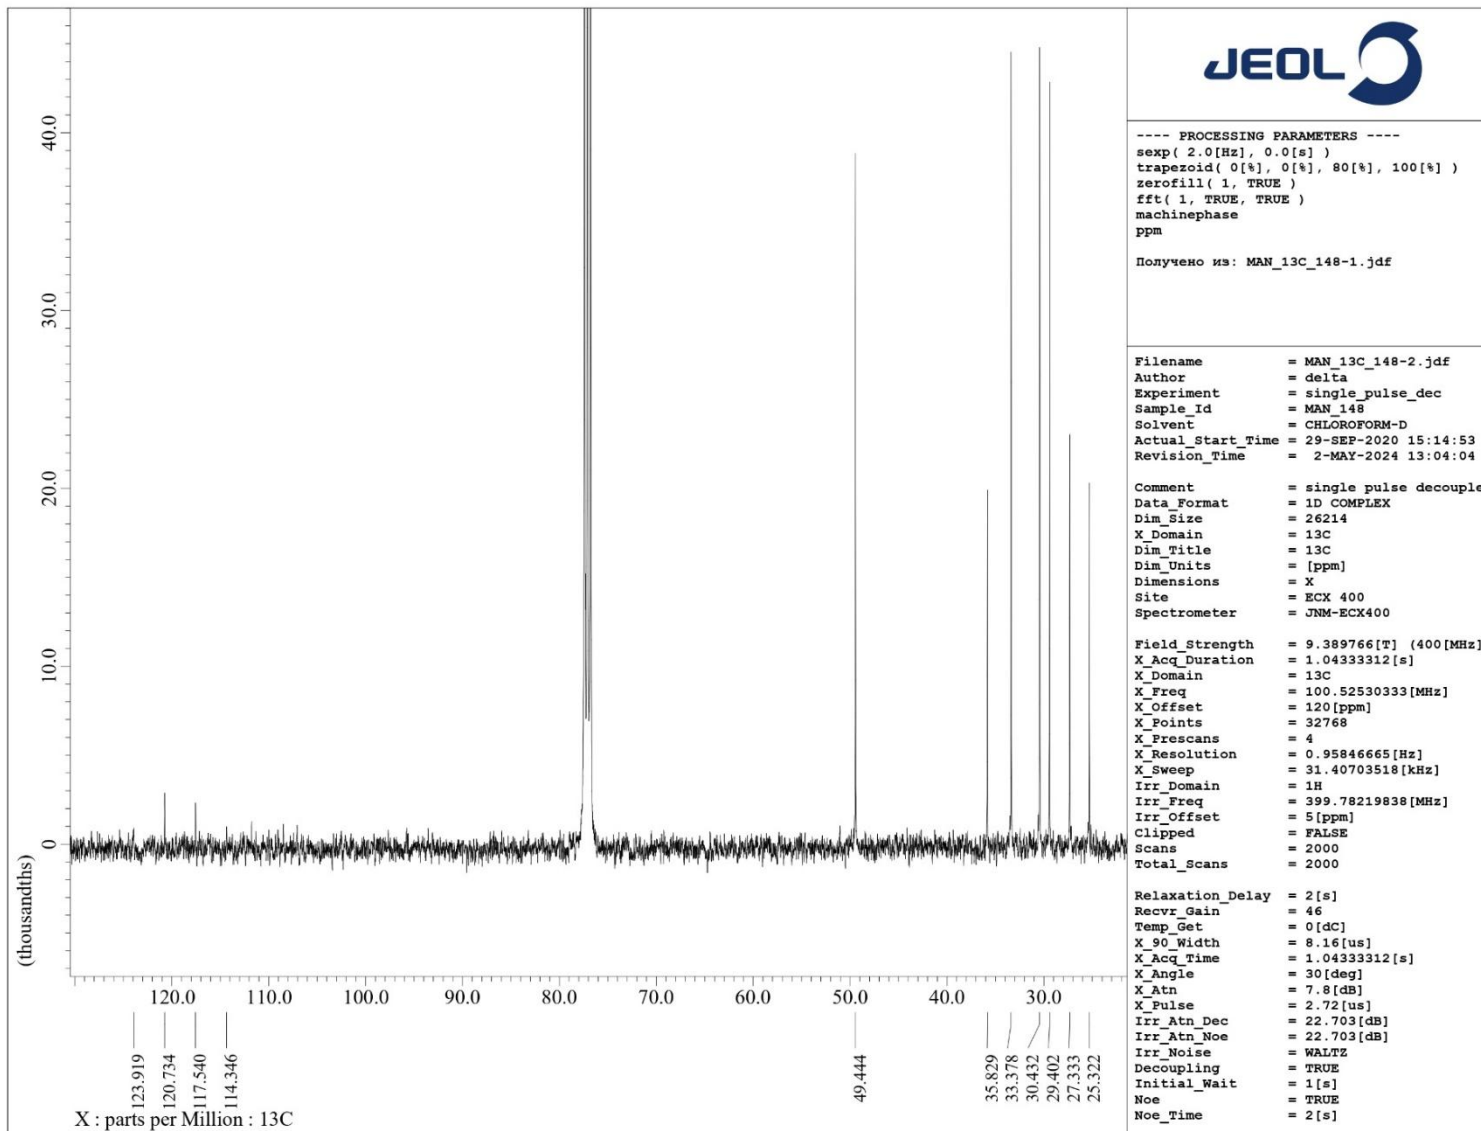

### 3.11. NMR spectra of *trans/cis*-*N*-(5-azidotricyclo[4.3.1.1<sup>3,8</sup>]undecan-4-yl)-4-methylbenzenesulfonamide (**13a,b**)

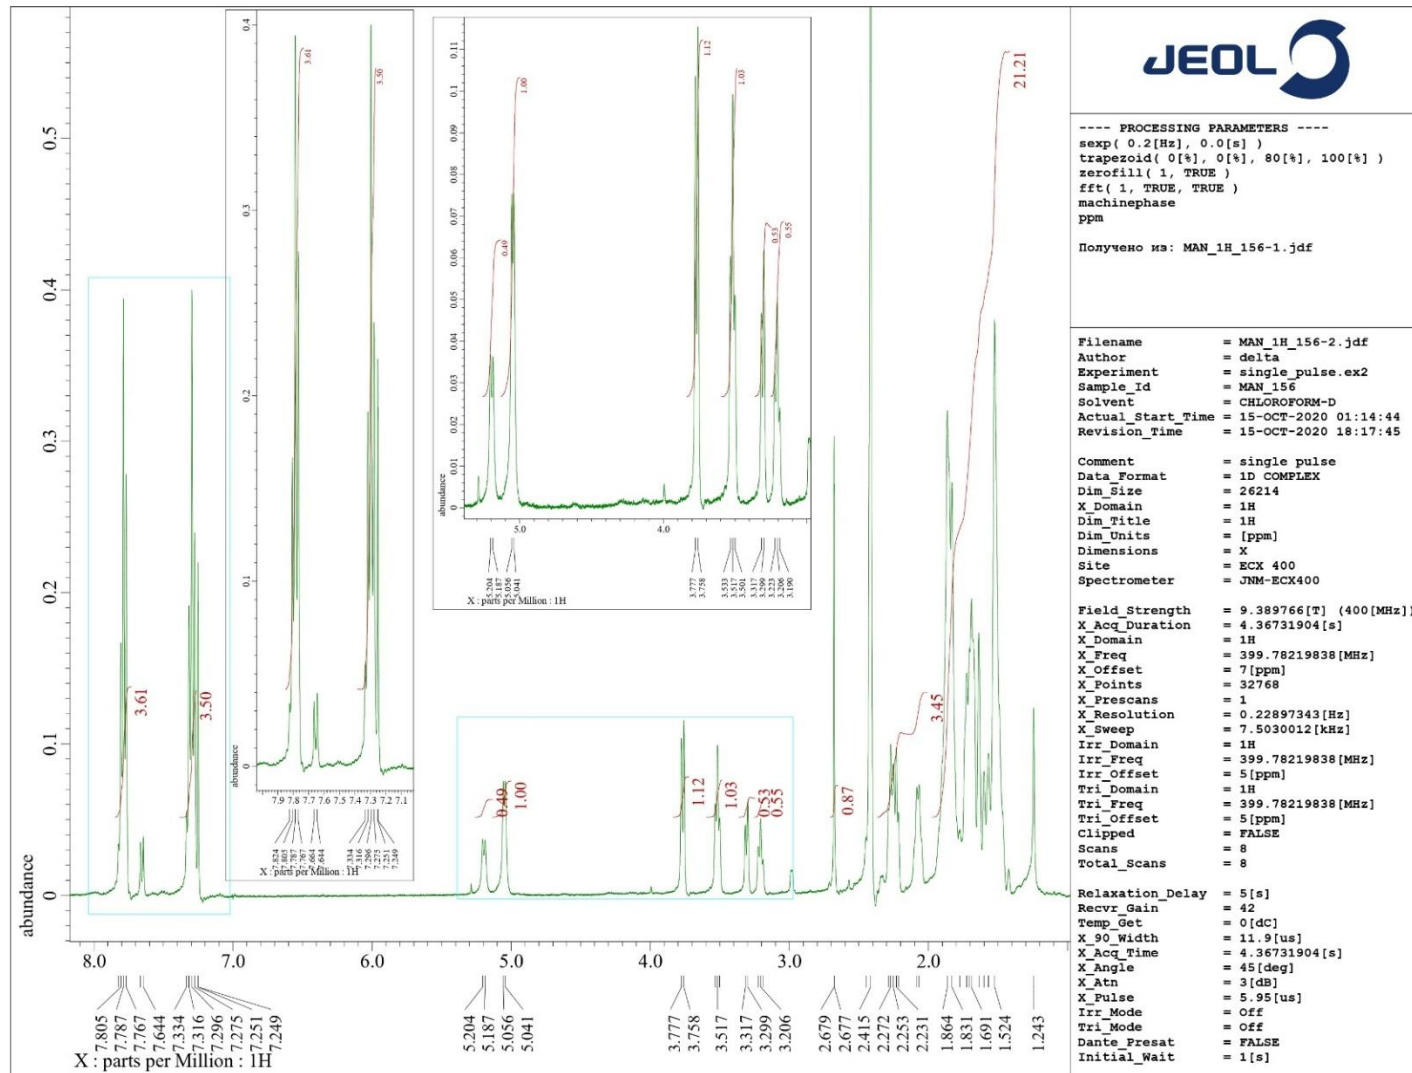

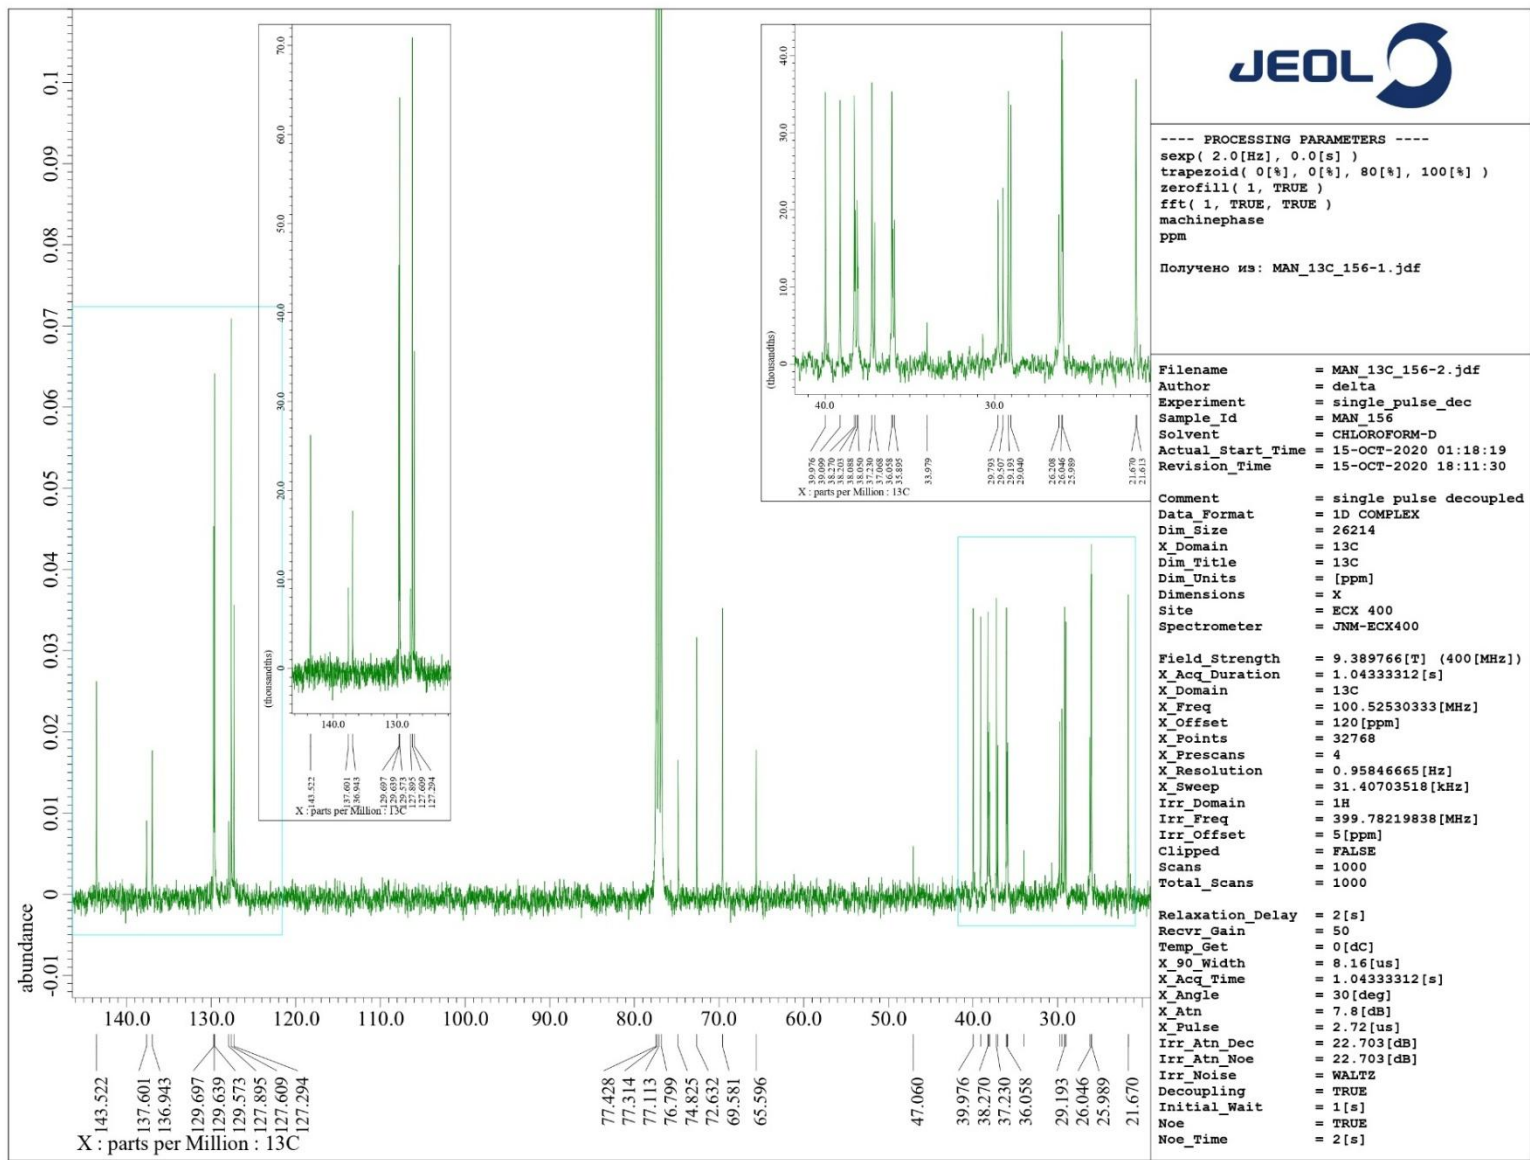

### 3.12. NMR spectra of *trans*-*N*-(5-azidotricyclo[4.3.1.1<sup>3,8</sup>]undecan-4-yl)-1,1,1-trifluoromethanesulfonamide (**14**)

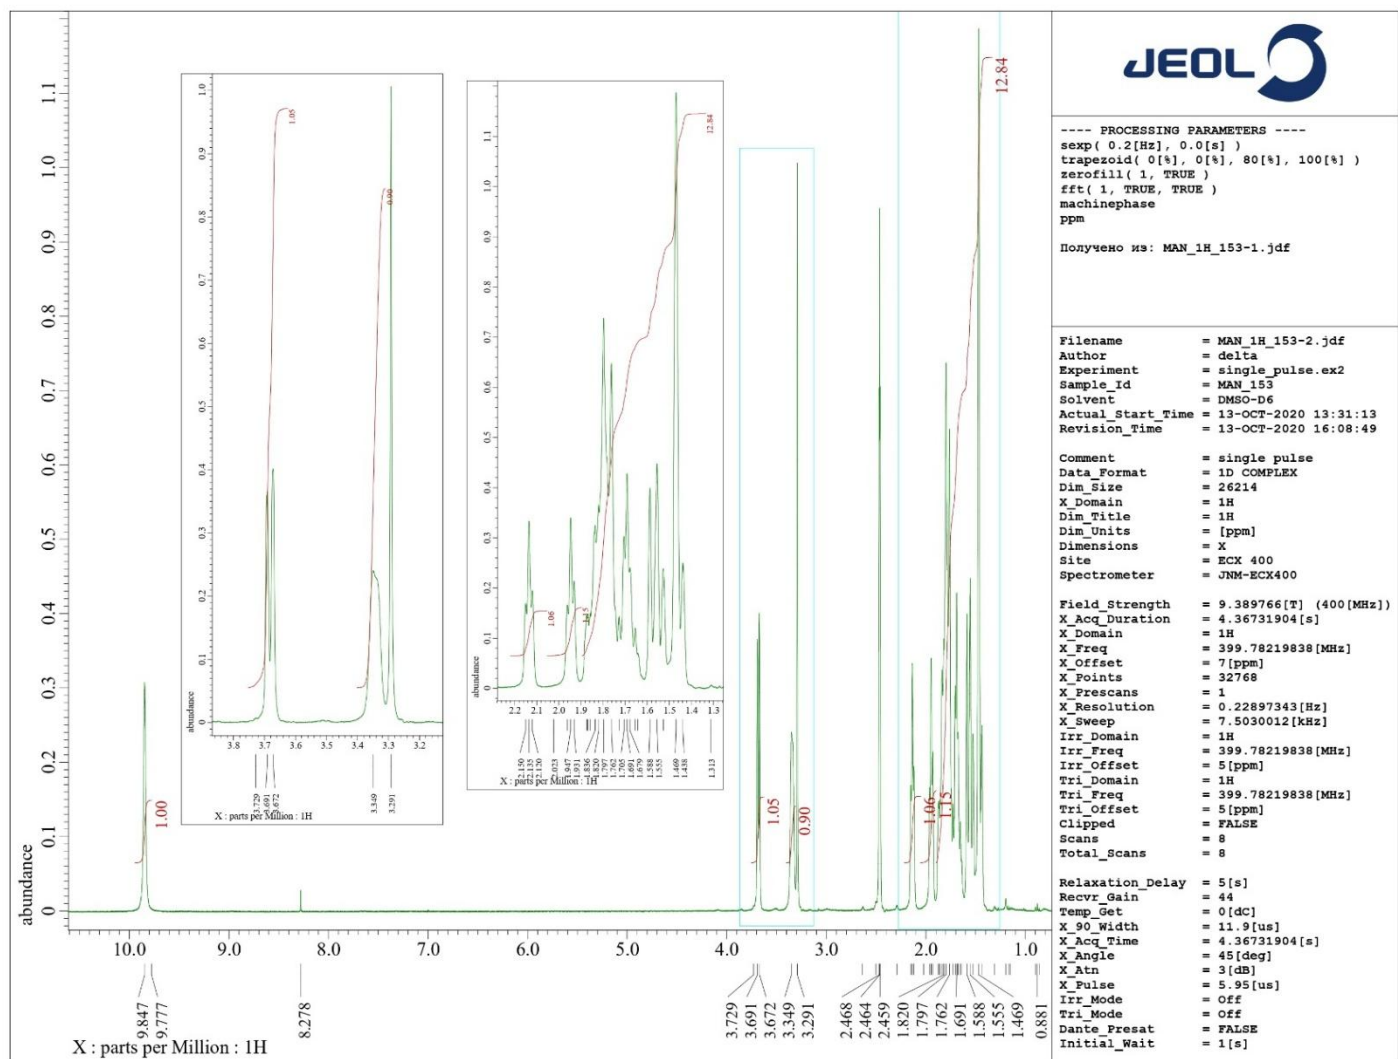

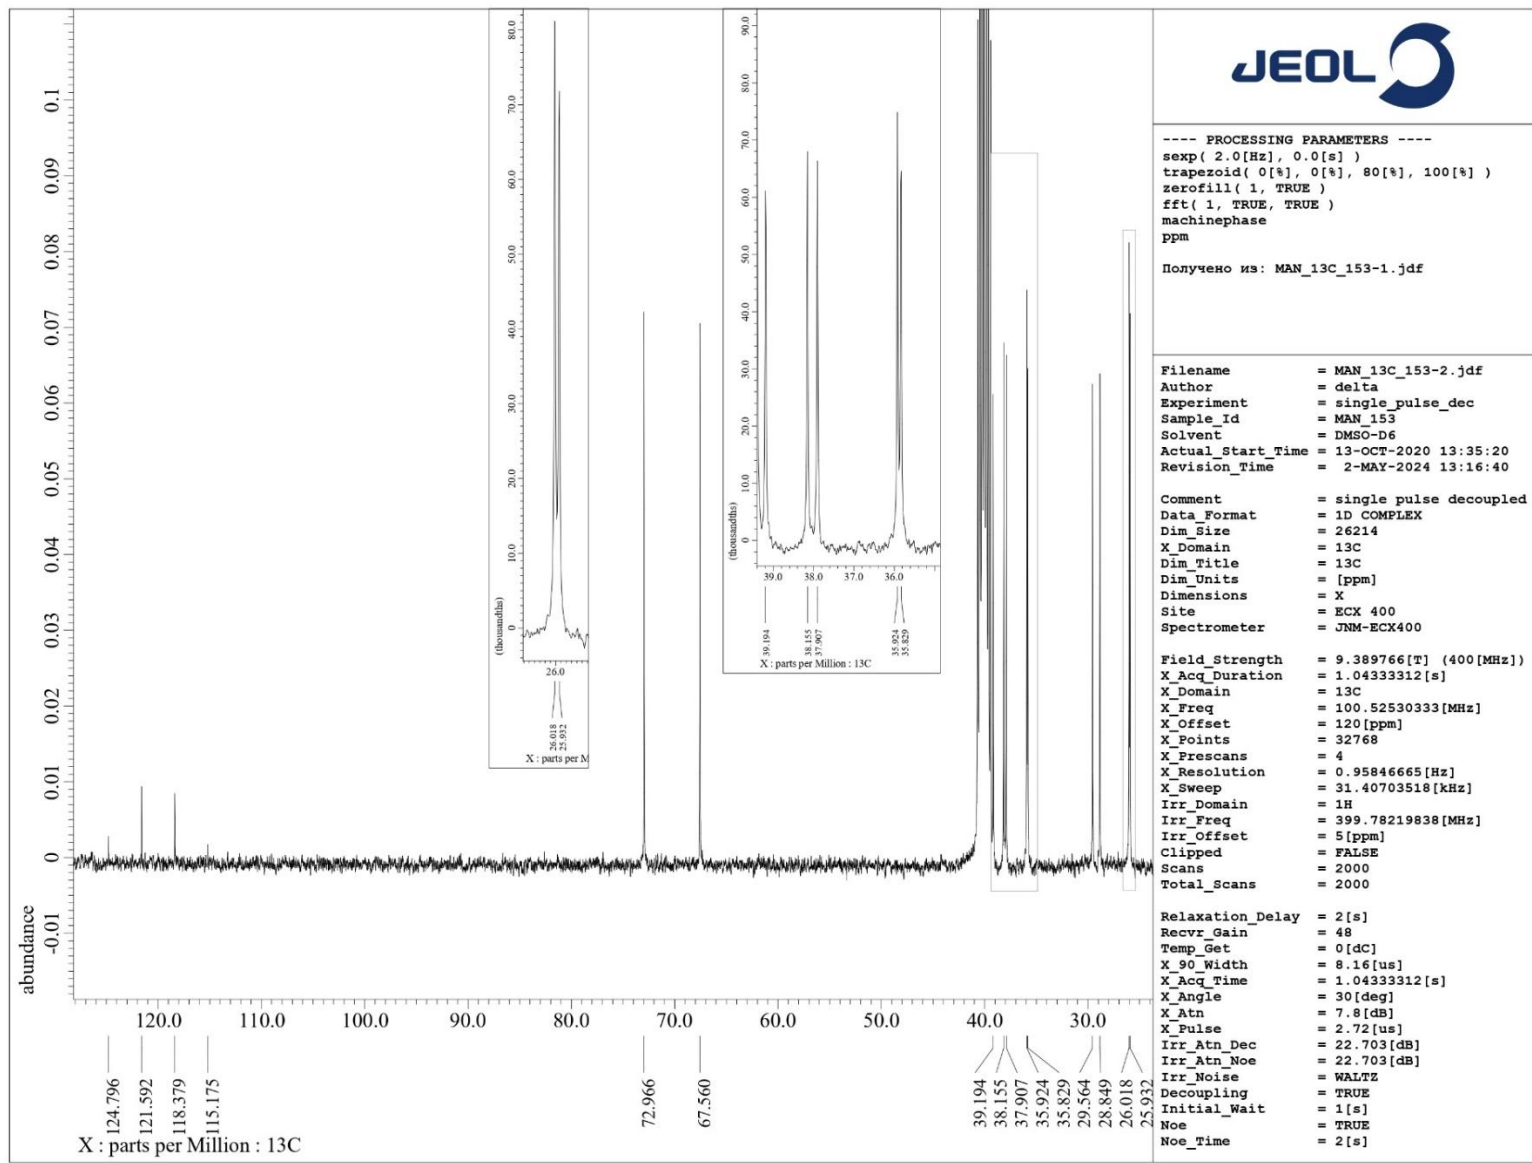

### 3.13. NMR spectra of *trans*-*N*-(5-aminotricyclo[4.3.1.1<sup>3,8</sup>]undecan-4-yl)-1,1,1-trifluoromethanesulfonamide (**15**)

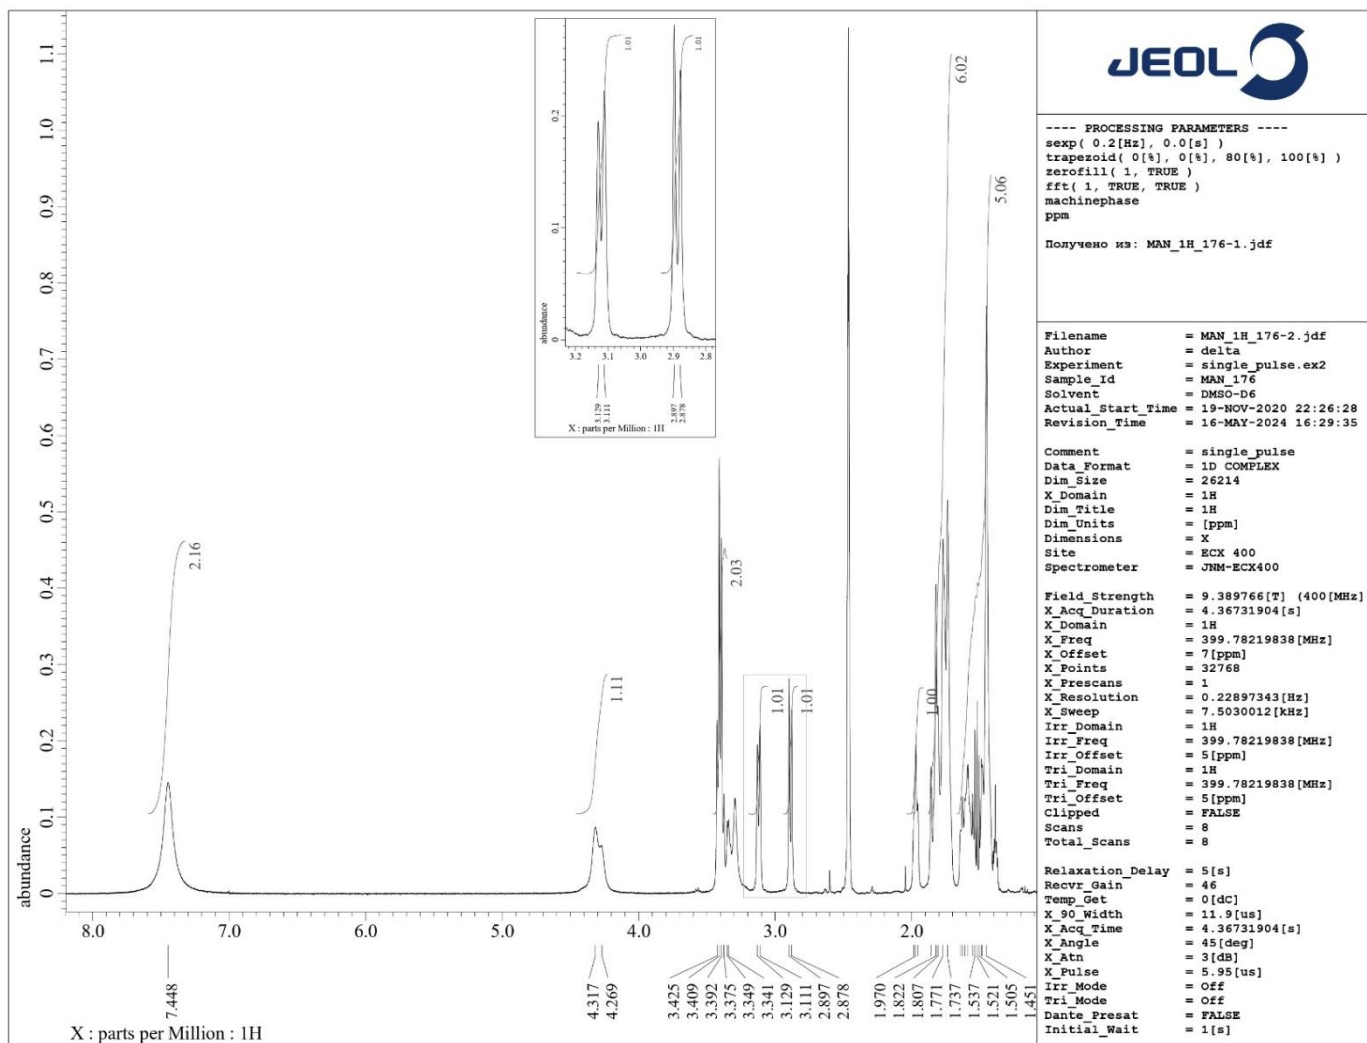

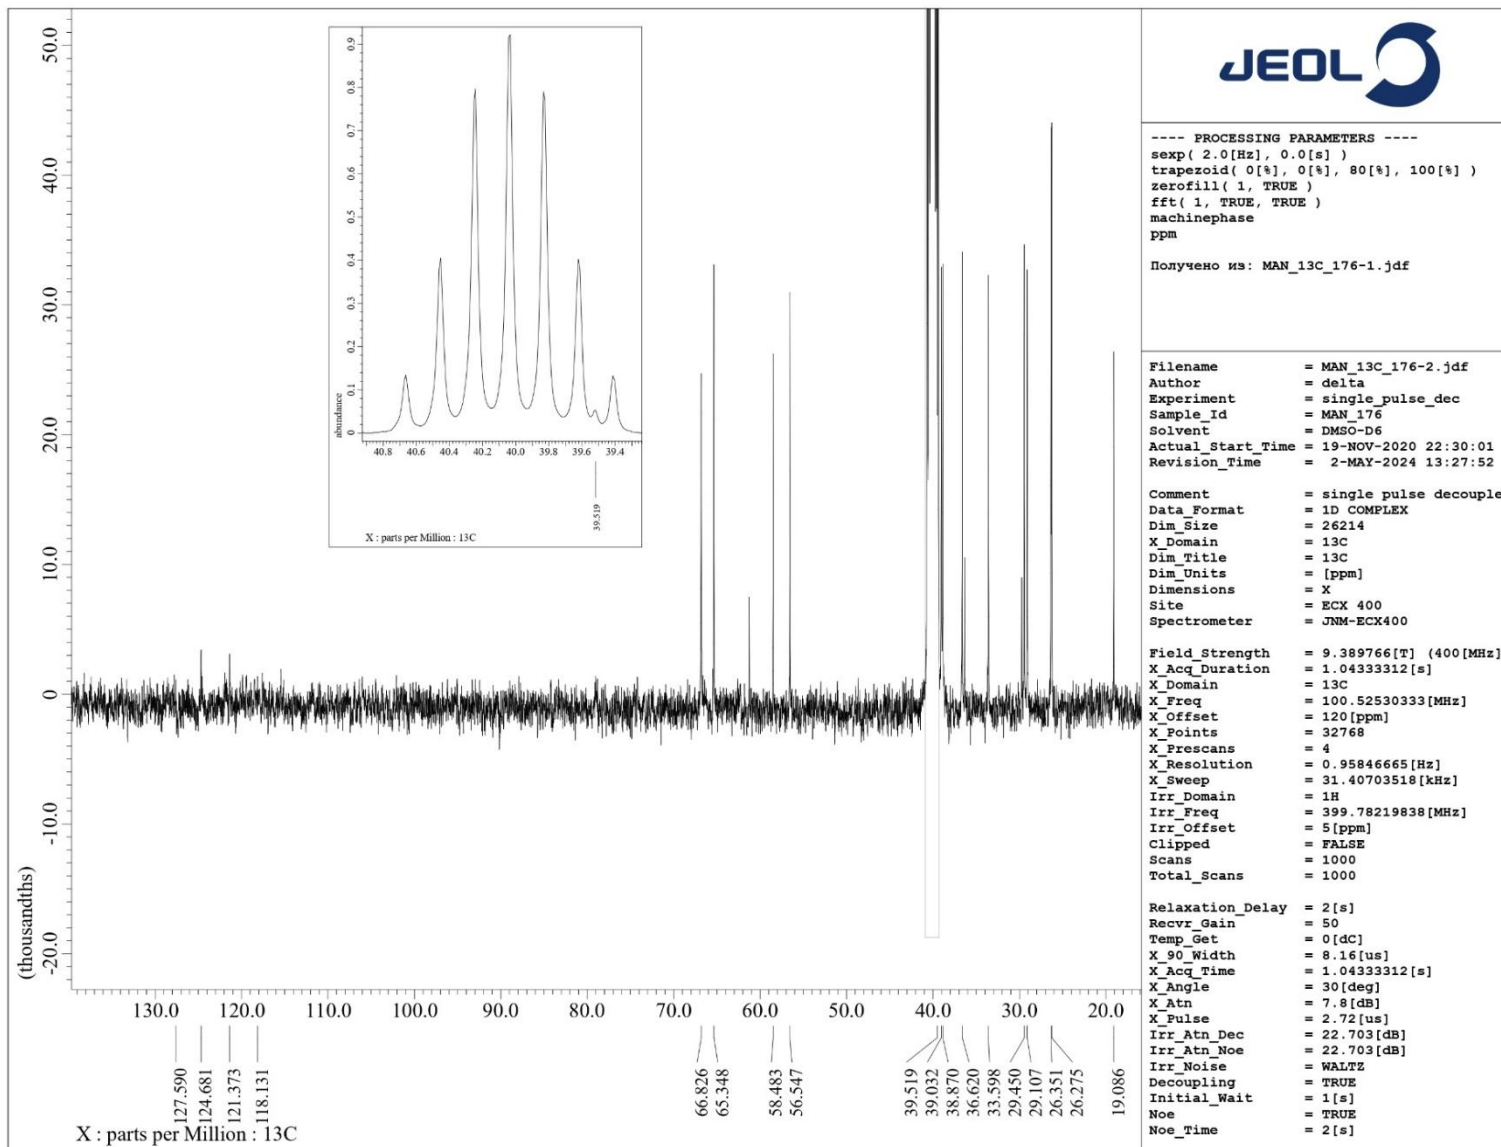



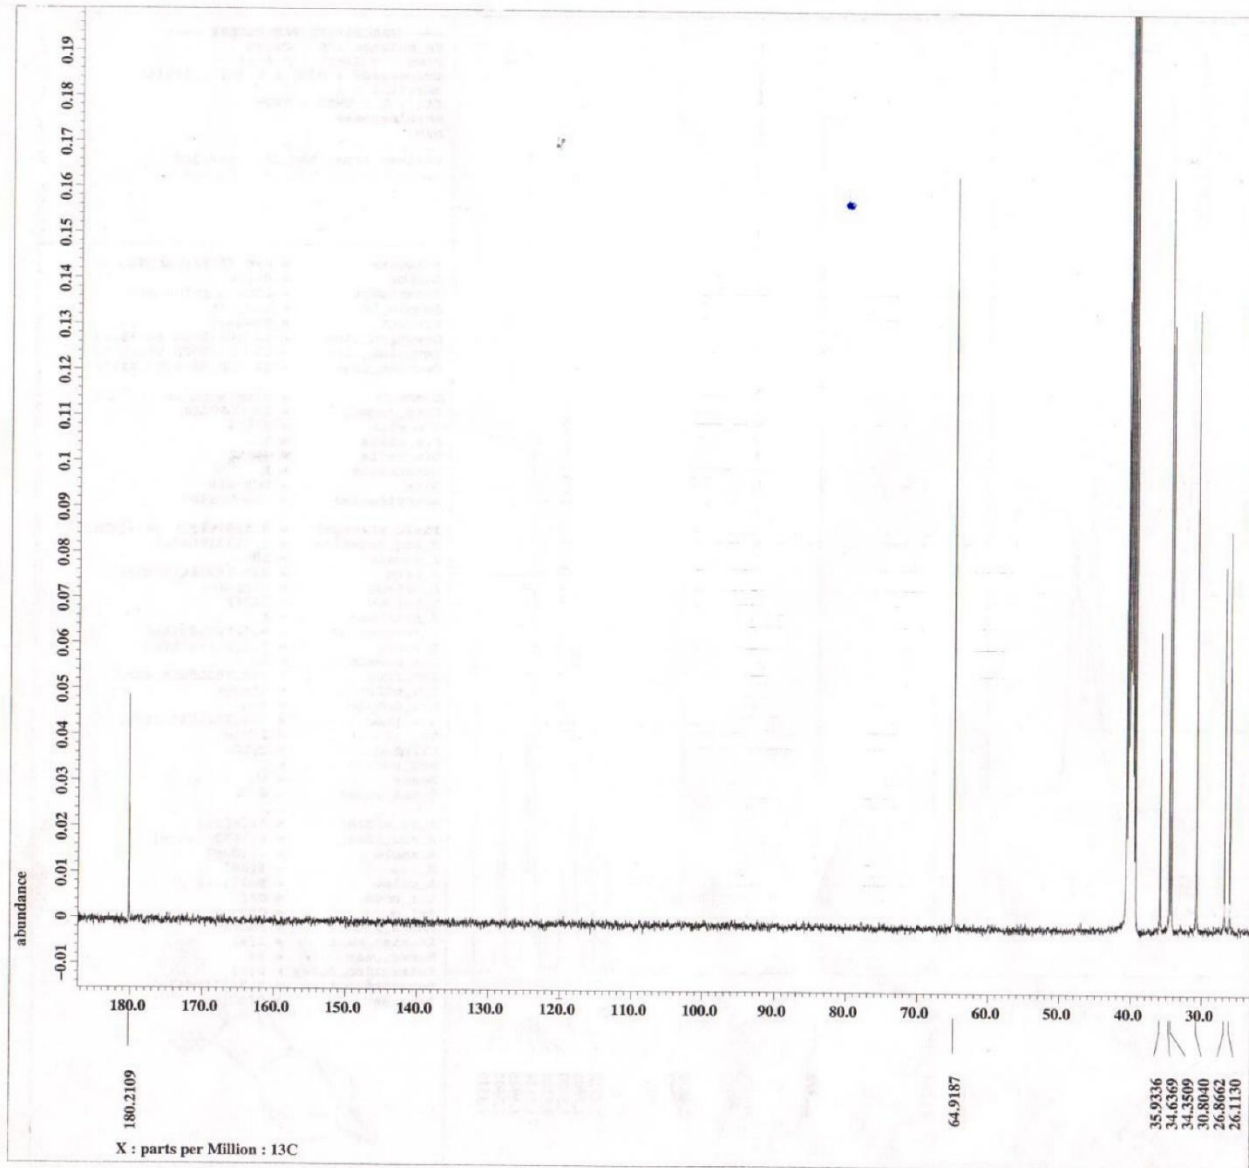

----- PROCESSING PARAMETERS -----  
 dc\_balance : 0 : FALSE  
 secp : 2.0 [Hz] : 0.0 [s]  
 trapezoid3 : 0 [%] : 80 [%] : 100 [%]  
 zerofill : 1  
 fft : 1 : TRUE : TRUE  
 machinephase  
 ppm  
 Derived from: MAN\_13C\_144-2.jdf

Filename = MAN\_13C\_144-5.jdf  
 Author = delta  
 Experiment = single\_pulse\_dec  
 Sample\_id = MAN\_144  
 Solvent = DMSO-D6  
 Creation\_time = 22-SEP-2020 07:11:01  
 Revision\_time = 22-SEP-2020 11:11:53  
 Current\_time = 22-SEP-2020 11:12:12

Comment = single pulse decouple  
 Data\_format = 1D COMPLEX  
 Dim\_size = 26214  
 Dim\_title = 13C  
 Dim\_units = [ppm]  
 Dimensions = X  
 Site = ECX 400  
 Spectrometer = JNM-ECX400

Field\_strength = 9.389766 [T] (400 [MHz])  
 X\_acq\_duration = 1.04333312 [s]  
 X\_domain = 13C  
 X\_freq = 100.52530333 [MHz]  
 X\_offset = 120 [ppm]  
 X\_points = 32768  
 X\_prescans = 4  
 X\_resolution = 0.95846665 [Hz]  
 X\_sweep = 31.40703518 [kHz]  
 Irr\_domain = 1H  
 Irr\_freq = 399.78219838 [MHz]  
 Irr\_offset = 5 [ppm]  
 Clipped = FALSE  
 Mod\_return = 1  
 Scans = 3000  
 Total\_scans = 3000

X\_90\_width = 8.16 [us]  
 X\_acq\_time = 1.04333312 [s]  
 X\_angle = 30 [deg]  
 X\_atn = 7.8 [dB]  
 X\_pulse = 2.72 [us]  
 Irr\_atn\_dec = 22.703 [dB]  
 Irr\_atn\_noe = 22.703 [dB]  
 Irr\_noise = WALTZ  
 Decoupling = TRUE  
 Initial\_wait = 1 [s]  
 Noe = TRUE  
 Noe\_time = 2 [s]  
 Recvr\_gain = 50  
 Relaxation\_delay = 2 [s]  
 Repetition\_time = 3.04333312 [s]  
 Temp\_get = 0 [dc]

3.15. NMR spectra of *rac*-2,3-diphenyl-4a,6,7,8,9,10,11,11a-octahydro-5H-5,9:7,11-dimethanocyclonona[*b*]pyrazine (17)

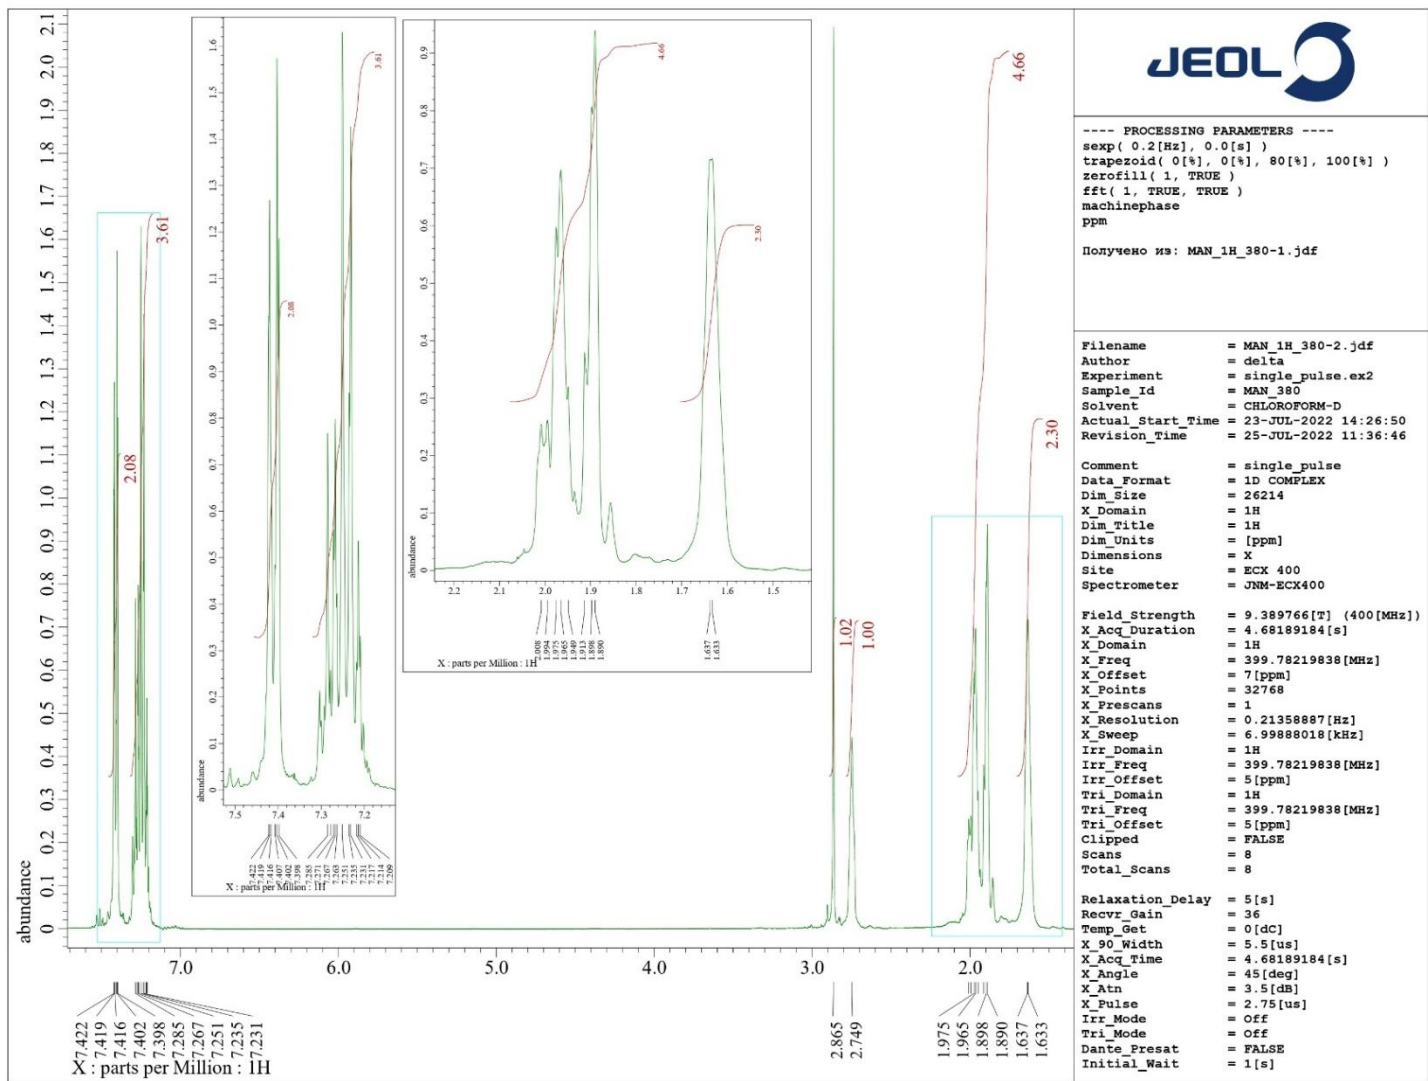

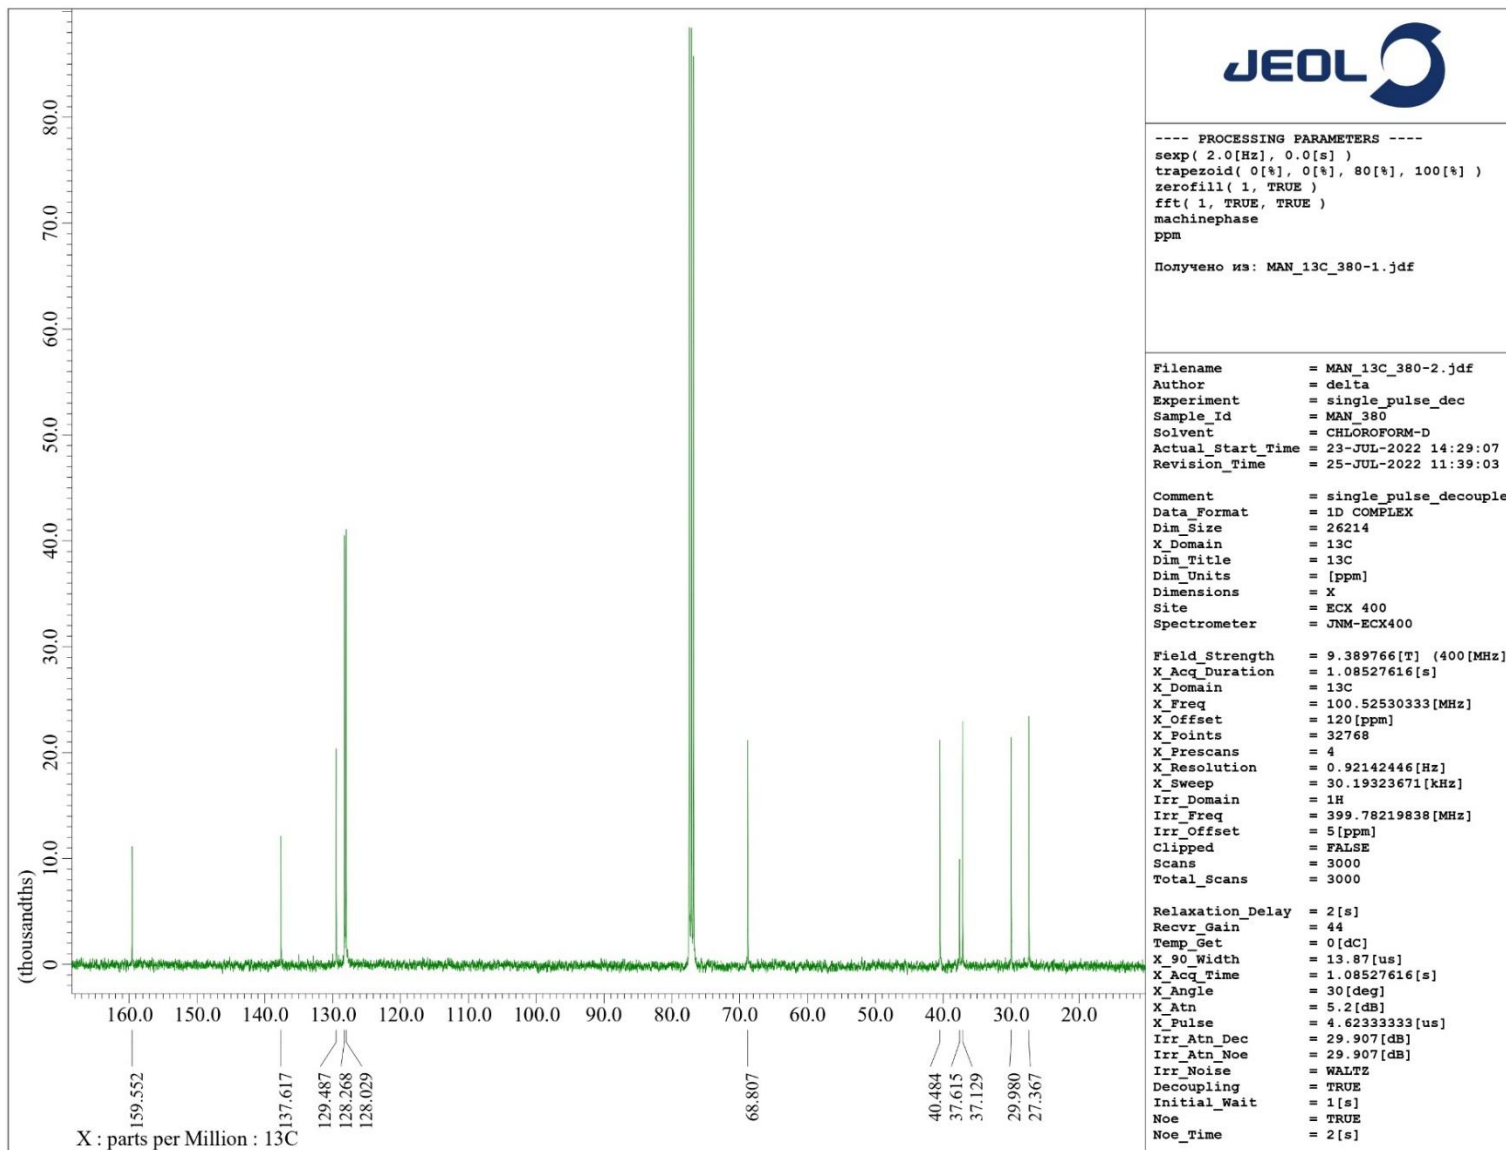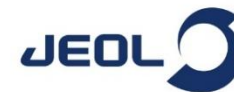

```

---- PROCESSING PARAMETERS ----
sexp( 2.0[Hz], 0.0[s] )
trapezoid( 0[%], 0[%], 80[%], 100[%] )
zerofill( 1, TRUE )
fft( 1, TRUE, TRUE )
machinephase
ppm

```

Получено из: MAN\_13C\_380-1.jdf

```

Filename      = MAN_13C_380-2.jdf
Author       = delta
Experiment   = single_pulse_dec
Sample Id    = MAN_380
Solvent      = CHLOROFORM-D
Actual_Start_Time = 23-JUL-2022 14:29:07
Revision_Time   = 25-JUL-2022 11:39:03

```

```

Comment      = single_pulse_decoupled
Data Format   = 1D COMPLEX
Dim_Size     = 26214
X_Domain     = 13C
Dim_Title    = 13C
Dim_Units    = [ppm]
Dimensions   = X
Site         = ECX 400
Spectrometer = JNM-ECX400

```

```

Field_Strength = 9.389766[T] (400[MHz])
X_Acq_Duration = 1.08527616[s]
X_Domain       = 13C
X_Freq         = 100.52530333[MHz]
X_Offset       = 120[ppm]
X_Points       = 32768
X_Prescans     = 4
X_Resolution   = 0.92142446[Hz]
X_Sweep        = 30.19323671[kHz]
Irr_Domain     = 1H
Irr_Freq       = 399.78219838[MHz]
Irr_Offset     = 5[ppm]
Clipped        = FALSE
Scans          = 3000
Total_Scans    = 3000

```

```

Relaxation_Delay = 2[s]
Recvr_Gain       = 44
Temp_Get         = 0[dc]
X_90_Width       = 13.87[us]
X_Acq_Time       = 1.08527616[s]
X_Angle          = 30[deg]
X_Atn            = 5.2[db]
X_Pulse          = 4.62333333[us]
Irr_Atn_Dec      = 29.907[db]
Irr_Atn_No     = 29.907[db]
Irr_Noise        = WALTZ
Decoupling       = TRUE
Initial_Wait     = 1[s]
Noe               = TRUE
Noe_Time         = 2[s]

```

### 3.16. NMR spectra of (4*R*,5*R*)-*N,N'*-(tricyclo[4.3.1.1<sup>3,8</sup>]*undecane-4,5-diyl*)bis(1-phenylmethanimine) (**18**)

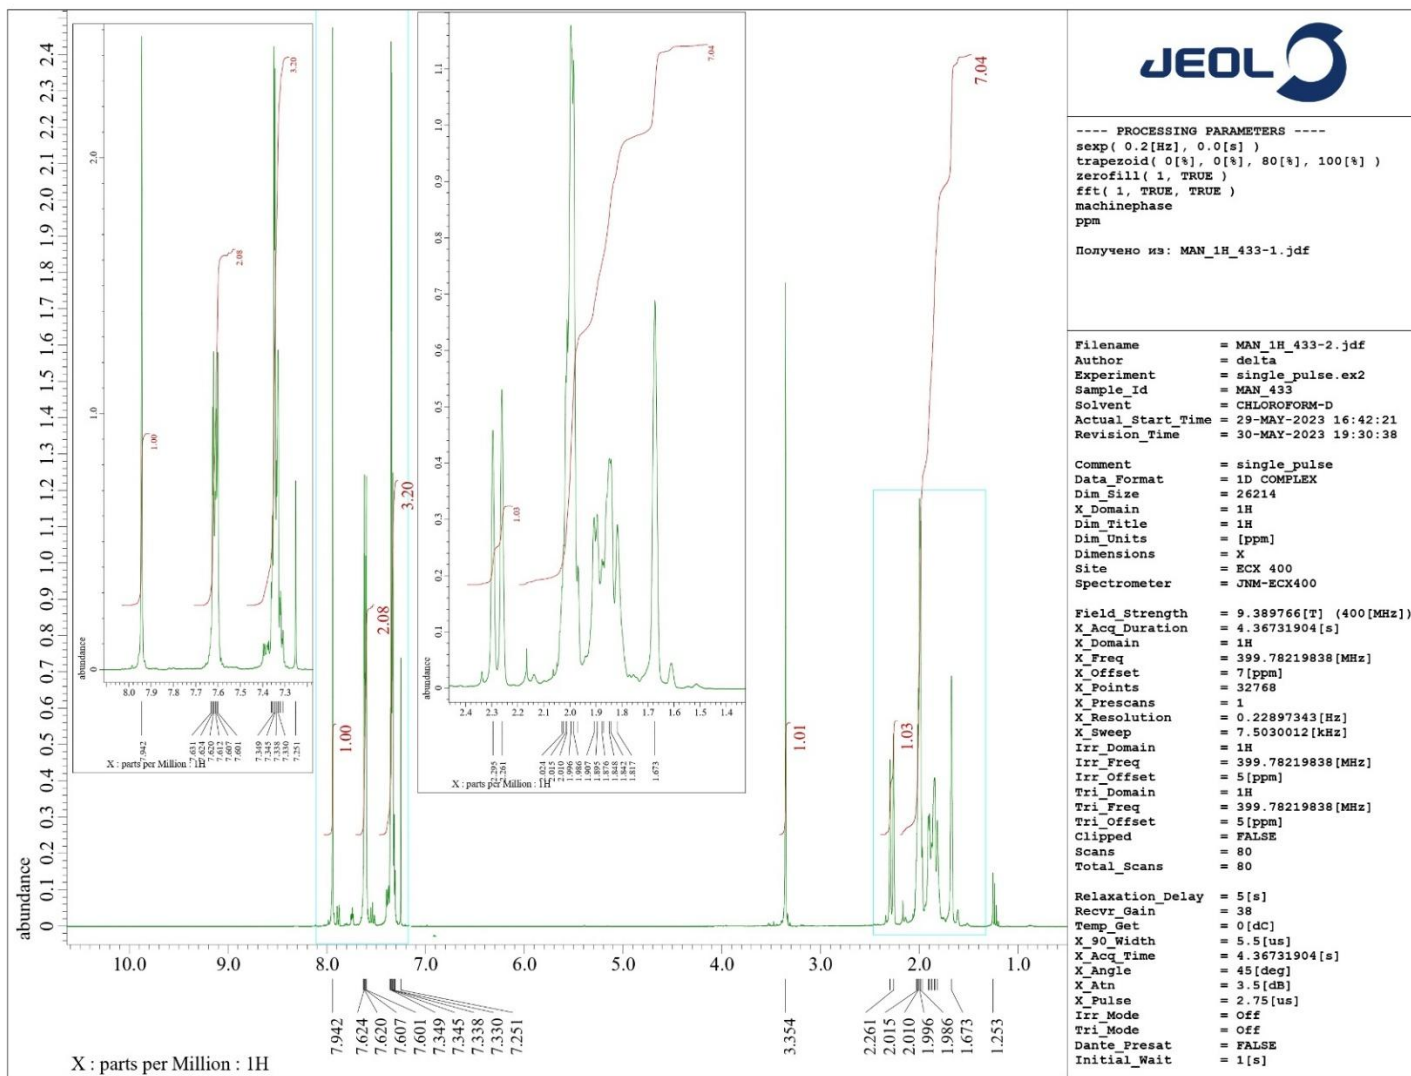

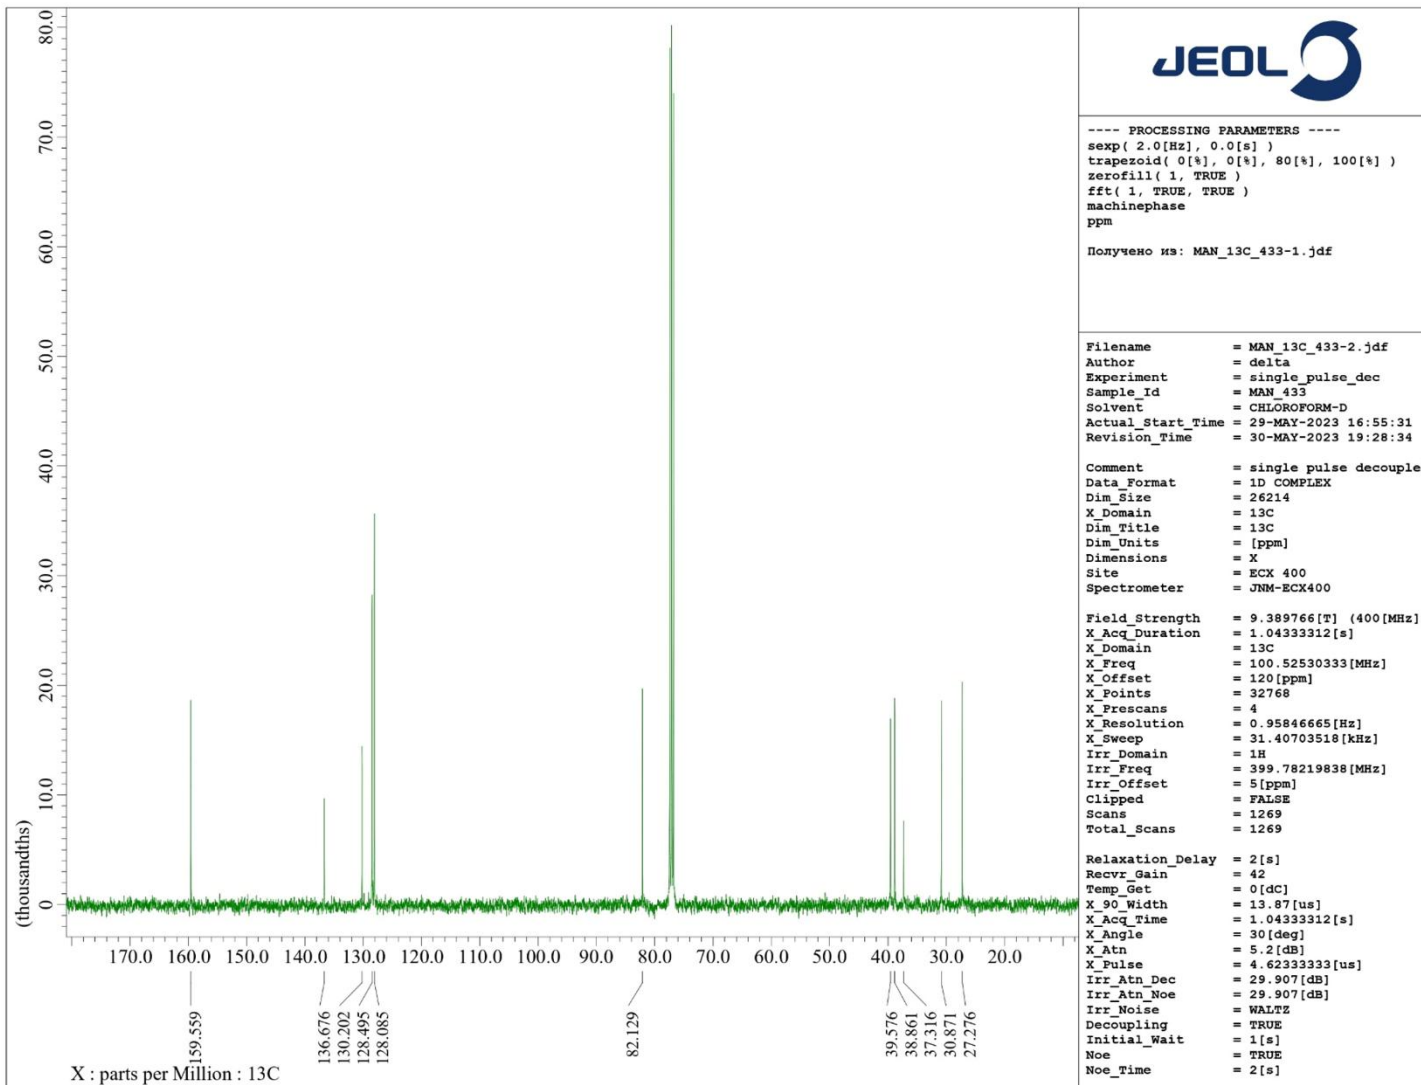

#### 4. Computational details of specific rotation determination of (4*R*,5*R*)-8a'

The crude geometry of initial diamine was built using Avogadro 1.2.1 [6] software package and proceeded for further optimization in gaussian 09.a [7]. Optimization of geometry was performed by HF/6-31G+(d) method. The initial dihedral angles of C5–C4–N–H(*si*) were set to 170.849, 48.603 and –60.801, keeping dihedral angle C4–C5–N–H(*si*) at approximately 171.5 degrees with further optimization of geometry of received 3 conformers along the C4–N bond. In each of the resulting structures the bond C5–N was scanned in 15 degrees using C4–C5–N–H(*si*) as redundant coordinates. All in 72 conformations were obtained and ranged by their relative energy with respect to the most stable conformer 1\_9. The results of geometry scans are presented in Tables S1–S3. From all structures those with the relative energy not more than 10 kJ/mol were chosen for further optimization as fraction in the solution would be the highest among all other conformers. Further geometry optimization of selected molecules with frozen C4–C5–N–H(*si*) dihedrals was performed by CAM-B3LYP/6-311G++(2d,2p) method with consideration of thermochemistry at 298 K and solvation with CH<sub>2</sub>Cl<sub>2</sub> in SMD model. Calculation of specific rotation of optimized structures was performed on the same level of theory for 365, 405, 436, 546, 589.3 and 633 nm. The fraction of each conformer was calculated from Boltzman law, using relative energy of each conformer. Total specific rotation at specific wavelength is calculated as a sum through all conformers of products of specific rotation of each conformer at selected wavelength on its fraction:

$$[\alpha_{\lambda}^{20}(total)] = \sum_{conformers} x(conf) * [\alpha_{\lambda}^{20}(conf)]$$

The results of specific rotation calculation are presented in table 4.

**Table S1: Data for C5–NH<sub>2</sub> bond scan with C4–NH<sub>2</sub> conformation with 50.665 degree dihedral angle (C5–C4–N–H(*re*) = -69.519 deg, C5–C4–N–H(*si*) = 170.849 deg)**

| Conformer name | Dihedral angle<br>C4–C5–N–H( <i>re</i> ) | Dihedral angle<br>C4–C5–N–H( <i>si</i> ) | Dihedral angle<br>C4–C5–N–lone pair | Energy HF/6-31G(d), Hartree | Relative energy, kJ/mol |
|----------------|------------------------------------------|------------------------------------------|-------------------------------------|-----------------------------|-------------------------|
| 1_1            | 50.288                                   | -67.320                                  | 171.484                             | -537.096805854              | 5.87                    |
| 1_2            | 63.257                                   | -52.320                                  | -174.532                            | -537.096182651              | 7.51                    |
| 1_3            | 77.657                                   | -37.321                                  | -159.832                            | -537.094637178              | 11.56                   |
| 1_4            | 93.842                                   | -22.321                                  | -144.239                            | -537.093118355              | 15.55                   |
| 1_5            | 111.374                                  | -7.321                                   | -127.973                            | -537.092763445              | 16.48                   |
| 1_6            | 128.506                                  | 7.678                                    | -111.908                            | -537.094041041              | 13.13                   |
| 1_7            | 143.522                                  | 22.678                                   | -96.899                             | -537.096324272              | 7.13                    |
| 1_8            | 156.879                                  | 37.678                                   | -82.720                             | -537.098384732              | 1.72                    |
| 1_9            | 169.862                                  | 52.678                                   | -68.729                             | -537.099041282              | 0.00                    |
| 1_10           | -176.658                                 | 67.678                                   | -54.489                             | -537.097770719              | 3.34                    |
| 1_11           | -161.951                                 | 82.678                                   | -39.636                             | -537.095050626              | 10.48                   |
| 1_12           | -145.569                                 | 97.678                                   | -23.945                             | -537.092120768              | 18.17                   |
| 1_13           | -128.001                                 | 112.678                                  | -7.661                              | -537.090265877              | 23.04                   |
| 1_14           | -110.950                                 | 127.678                                  | 8.364                               | -537.089931489              | 23.92                   |
| 1_15           | -95.513                                  | 142.678                                  | 23.582                              | -537.090601312              | 22.16                   |
| 1_16           | -81.395                                  | 157.678                                  | 38.141                              | -537.091394945              | 20.08                   |

|      |         |          |          |                |       |
|------|---------|----------|----------|----------------|-------|
| 1_17 | -67.693 | 172.678  | 52.492   | -537.091570833 | 19.61 |
| 1_18 | -53.560 | -172.321 | 67.059   | -537.090802794 | 21.63 |
| 1_19 | -37.486 | -157.321 | 82.595   | -537.089439123 | 25.21 |
| 1_20 | -17.094 | -142.321 | 100.292  | -537.088911610 | 26.60 |
| 1_21 | 1.866   | -127.321 | 117.272  | -537.090181142 | 23.26 |
| 1_22 | 15.439  | -112.321 | 131.559  | -537.092296619 | 17.71 |
| 1_23 | 26.976  | -97.321  | 144.827  | -537.094499192 | 11.93 |
| 1_24 | 38.351  | -82.321  | 158.0154 | -537.096173643 | 7.53  |

**Table S2: Data for C5–NH<sub>2</sub> bond scan with C4–NH<sub>2</sub> conformation with –61.163 degree dihedral angle (C5–C4–N–H(*re*) = 167.440 deg, C5–C4–N–H(*si*) = 48.603 deg)**

| Conformer name | Dihedral angle<br>C4–C5–N–H( <i>re</i> ) | Dihedral angle<br>C4–C5–N–H( <i>si</i> ) | Dihedral angle<br>C4–C5–N–lone pair | Energy HF/6-<br>31G(d), Hartree | Relative energy,<br>kJ/mol |
|----------------|------------------------------------------|------------------------------------------|-------------------------------------|---------------------------------|----------------------------|
| 2_1            | 58.454                                   | -60.981                                  | 178.737                             | -537.094624661                  | 11.60                      |
| 2_2            | 73.800                                   | -45.981                                  | -166.090                            | -537.094276858                  | 12.51                      |
| 2_3            | 90.297                                   | -30.981                                  | -150.342                            | -537.093586245                  | 14.32                      |
| 2_4            | 107.319                                  | -15.981                                  | -134.331                            | -537.093167343                  | 15.42                      |
| 2_5            | 123.958                                  | -0.981                                   | -118.512                            | -537.093475631                  | 14.61                      |
| 2_6            | 138.625                                  | 14.019                                   | -103.678                            | -537.094484453                  | 11.96                      |
| 2_7            | 151.419                                  | 29.019                                   | -89.781                             | -537.095674893                  | 8.84                       |

|      |          |          |         |                |       |
|------|----------|----------|---------|----------------|-------|
| 2_8  | 163.588  | 44.019   | -76.197 | -537.096358162 | 7.04  |
| 2_9  | 176.137  | 59.019   | -62.422 | -537.096035533 | 7.89  |
| 2_10 | -170.096 | 74.020   | -48.038 | -537.094740120 | 11.29 |
| 2_11 | -154.222 | 89.019   | -32.601 | -537.093271971 | 15.15 |
| 2_12 | -136.213 | 104.019  | -16.097 | -537.092779570 | 16.44 |
| 2_13 | -117.920 | 119.019  | 0.550   | -537.093763168 | 13.86 |
| 2_14 | -102.121 | 134.019  | 15.949  | -537.095785137 | 8.55  |
| 2_15 | -88.544  | 149.019  | 30.238  | -537.097832087 | 3.17  |
| 2_16 | -75.762  | 164.019  | 44.128  | -537.098988203 | 0.14  |
| 2_17 | -62.822  | 179.019  | 58.098  | -537.098688533 | 0.93  |
| 2_18 | -49.043  | -165.981 | 72.488  | -537.096941873 | 5.51  |
| 2_19 | -33.767  | -150.981 | 87.626  | -537.094462651 | 12.02 |
| 2_20 | -16.973  | -135.981 | 103.523 | -537.092419340 | 17.39 |
| 2_21 | -0.022   | -120.981 | 119.499 | -537.091659008 | 19.38 |
| 2_22 | 15.702   | -105.981 | 134.860 | -537.092139089 | 18.12 |
| 2_23 | 30.094   | -90.981  | 149.557 | -537.093227500 | 15.26 |
| 2_24 | 44.138   | -75.981  | 164.079 | -537.094227250 | 12.64 |

**Table S3: Data for C5–NH<sub>2</sub> bond scan with C4–NH<sub>2</sub> conformation with 178.953 degree dihedral angle (C5–C4–N–H(*re*) = 58.707 deg, C5–C4–N–H(*si*) = -60.801 deg)**

| Conformer name | Dihedral angle<br>C4–C5–N–H( <i>re</i> ) | Dihedral angle<br>C4–C5–N–H( <i>si</i> ) | Dihedral angle<br>C4–C5–N–lone pair | Energy HF/6-31G(d), Hartree | Relative energy, kJ/mol |
|----------------|------------------------------------------|------------------------------------------|-------------------------------------|-----------------------------|-------------------------|
| 3_1            | 58.718                                   | -60.788                                  | 178.965                             | -537.092853637              | 16.25                   |
| 3_2            | 73.652                                   | -45.788                                  | -166.068                            | -537.092458951              | 17.28                   |
| 3_3            | 89.905                                   | -30.789                                  | -150.442                            | -537.091640971              | 19.43                   |
| 3_4            | 107.338                                  | -15.788                                  | -134.225                            | -537.091130661              | 20.77                   |
| 3_5            | 124.447                                  | -0.788                                   | -118.170                            | -537.091462134              | 19.90                   |
| 3_6            | 139.160                                  | 14.211                                   | -103.314                            | -537.092545685              | 17.05                   |
| 3_7            | 151.890                                  | 29.211                                   | -89.449                             | -537.093810681              | 13.73                   |
| 3_8            | 163.878                                  | 44.212                                   | -75.955                             | -537.094576899              | 11.72                   |
| 3_9            | 176.377                                  | 59.212                                   | -62.206                             | -537.094346597              | 12.33                   |
| 3_10           | -169.705                                 | 74.212                                   | -47.746                             | -537.093140073              | 15.49                   |
| 3_11           | -153.880                                 | 89.211                                   | -32.334                             | -537.091635391              | 19.44                   |
| 3_12           | -136.093                                 | 104.211                                  | -15.941                             | -537.090861769              | 21.48                   |
| 3_13           | -117.933                                 | 119.212                                  | 0.639                               | -537.091582499              | 19.58                   |
| 3_14           | -102.005                                 | 134.212                                  | 16.104                              | -537.093467608              | 14.63                   |
| 3_15           | -88.251                                  | 149.212                                  | 30.480                              | -537.095497146              | 9.31                    |
| 3_16           | -75.383                                  | 164.212                                  | 44.414                              | -537.096705412              | 6.13                    |

|      |         |          |         |                |       |
|------|---------|----------|---------|----------------|-------|
| 3_17 | -62.457 | 179.211  | 58.377  | -537.096481597 | 6.72  |
| 3_18 | -48.649 | -165.789 | 72.781  | -537.094802629 | 11.13 |
| 3_19 | -33.379 | -150.789 | 87.916  | -537.092369669 | 17.52 |
| 3_20 | -16.643 | -135.789 | 103.784 | -537.090351836 | 22.81 |
| 3_21 | 0.387   | -120.788 | 119.799 | -537.089610645 | 24.76 |
| 3_22 | 16.189  | -105.788 | 135.201 | -537.090144279 | 23.36 |
| 3_23 | 30.712  | -90.789  | 149.962 | -537.091330091 | 20.25 |
| 3_24 | 44.659  | -75.788  | 164.435 | -537.092422075 | 17.38 |

**Table S4: Energies for most stable conformers, their distribution and specific rotation for 6 wavelengths**

| Conformer name | Energy DFT/CAM-B3LYP/6-311G++(2d.2p)/SMD(CH <sub>2</sub> Cl <sub>2</sub> ), Hartree | Relative energy, kJ/mol | Conformer fraction, x(conf) | Specific rotation, [ $\alpha_{\lambda}^{20}(\text{conf})$ ]. wavelength |        |        |        |          |        |
|----------------|-------------------------------------------------------------------------------------|-------------------------|-----------------------------|-------------------------------------------------------------------------|--------|--------|--------|----------|--------|
|                |                                                                                     |                         |                             | 365 nm                                                                  | 405 nm | 436 nm | 546 nm | 589.3 nm | 633 nm |
| 1_1            | -540.605881                                                                         | 3.02                    | 0.048                       | 212.49                                                                  | 151.21 | 121.13 | 65.86  | 54.43    | 45.78  |
| 1_2            | -540.605333                                                                         | 4.46                    | 0.027                       | 244.84                                                                  | 176.80 | 142.77 | 78.92  | 65.48    | 55.23  |
| 1_7            | -540.605205                                                                         | 4.79                    | 0.023                       | 13.75                                                                   | 11.05  | 9.35   | 5.56   | 4.67     | 3.97   |
| 1_8            | -540.606620                                                                         | 1.08                    | 0.104                       | 1.47                                                                    | -1.45  | -2.34  | -2.72  | -2.55    | -2.34  |
| 1_9            | -540.607030                                                                         | 0.00                    | 0.161                       | 24.52                                                                   | 12.59  | 7.86   | 1.61   | 0.80     | 0.31   |
| 1_10           | -540.606068                                                                         | 2.53                    | 0.058                       | 71.40                                                                   | 45.11  | 33.53  | 15.10  | 11.86    | 9.55   |
| 1_24           | -540.605484                                                                         | 4.06                    | 0.031                       | 179.17                                                                  | 124.50 | 98.41  | 51.97  | 42.66    | 35.68  |

|      |             |      |       |        |        |        |       |       |       |
|------|-------------|------|-------|--------|--------|--------|-------|-------|-------|
| 2_7  | -540.604932 | 5.51 | 0.017 | 92.97  | 62.30  | 48.22  | 24.30 | 19.72 | 16.35 |
| 2_8  | -540.605541 | 3.91 | 0.033 | 93.73  | 60.09  | 45.19  | 21.18 | 16.85 | 13.73 |
| 2_9  | -540.605386 | 4.32 | 0.028 | 120.96 | 78.64  | 59.66  | 28.55 | 22.83 | 18.70 |
| 2_14 | -540.604045 | 7.84 | 0.007 | 112.97 | 78.02  | 61.40  | 32.06 | 26.23 | 21.88 |
| 2_15 | -540.605744 | 3.38 | 0.041 | 59.48  | 39.51  | 30.35  | 14.93 | 12.02 | 9.90  |
| 2_16 | -540.606864 | 0.44 | 0.135 | 22.94  | 12.39  | 8.11   | 2.23  | 1.41  | 0.89  |
| 2_17 | -540.606947 | 0.22 | 0.147 | 21.55  | 10.44  | 6.13   | 0.65  | 0.00  | -0.36 |
| 2_18 | -540.605873 | 3.04 | 0.047 | 60.56  | 38.12  | 28.28  | 12.72 | 9.98  | 8.04  |
| 3_15 | -540.604453 | 6.77 | 0.010 | 289.97 | 206.52 | 165.57 | 90.25 | 74.65 | 62.83 |
| 3_16 | -540.605651 | 3.62 | 0.037 | 232.57 | 165.45 | 132.55 | 72.09 | 59.59 | 50.13 |
| 3_17 | -540.605799 | 3.23 | 0.044 | 202.31 | 143.80 | 115.12 | 62.48 | 51.62 | 43.40 |

Coordinates of conformer 1\_1

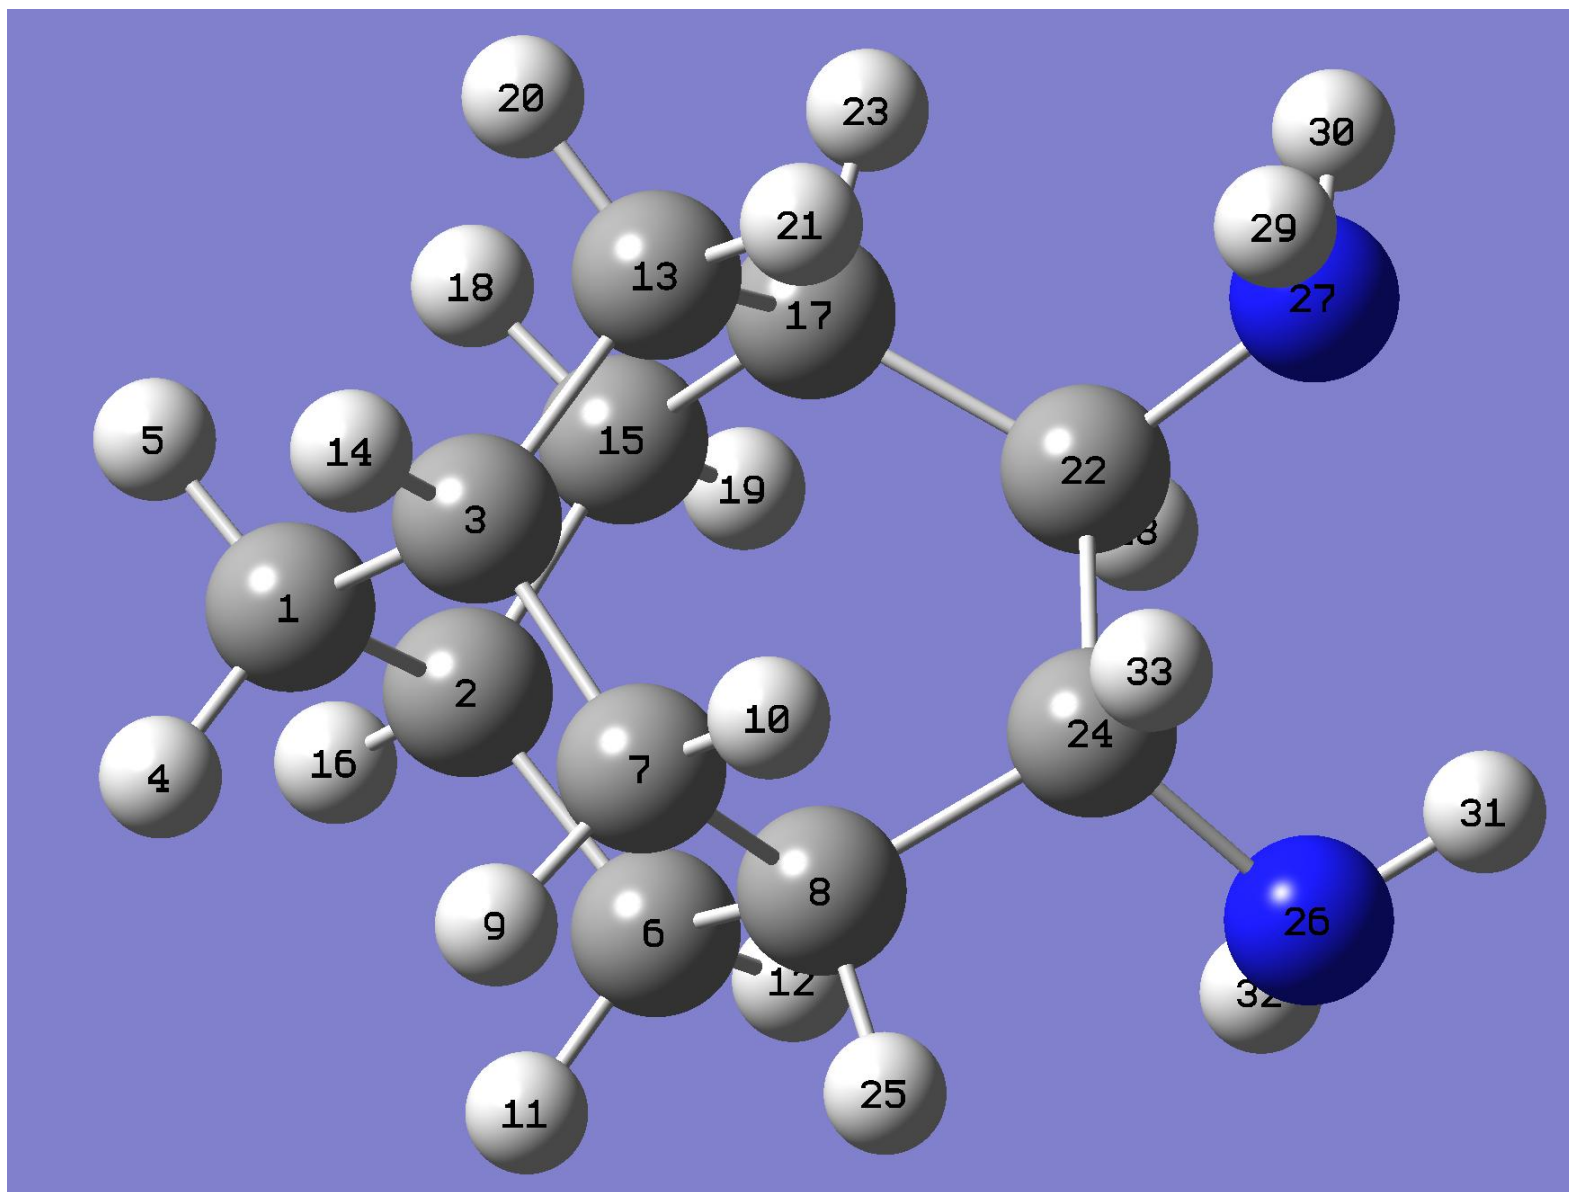

| Tag | Symbol | X          | Y          | Z          |
|-----|--------|------------|------------|------------|
| 1   | C      | -2.4685380 | 0.0183170  | -0.0045110 |
| 2   | C      | -1.5793060 | -0.2418790 | -1.2208280 |
| 3   | C      | -1.5804710 | 0.2627990  | 1.2159250  |
| 4   | H      | -3.1244450 | -0.8348470 | 0.1826940  |
| 5   | H      | -3.1085410 | 0.8828860  | -0.1948410 |
| 6   | C      | -0.6927760 | -1.4744980 | -0.9818440 |
| 7   | C      | -0.8121670 | -1.0239160 | 1.5069650  |
| 8   | C      | 0.0853850  | -1.4745820 | 0.3477050  |
| 9   | H      | -1.5413240 | -1.8117170 | 1.7117570  |
| 10  | H      | -0.2091550 | -0.9150630 | 2.4106710  |
| 11  | H      | -1.3411800 | -2.3535940 | -0.9856230 |
| 12  | H      | -0.0044320 | -1.6041540 | -1.8210070 |
| 13  | C      | -0.6733690 | 1.4812600  | 0.9813320  |
| 14  | H      | -2.2097050 | 0.4831680  | 2.0807140  |
| 15  | C      | -0.7881100 | 1.0314700  | -1.5092620 |
| 16  | H      | -2.2082800 | -0.4527360 | -2.0881800 |
| 17  | C      | 0.1093930  | 1.4651230  | -0.3437310 |
| 18  | H      | -1.5015430 | 1.8315280  | -1.7219930 |
| 19  | H      | -0.1800870 | 0.9086640  | -2.4082800 |
| 20  | H      | -1.3072560 | 2.3709840  | 0.9843900  |
| 21  | H      | 0.0161630  | 1.5985100  | 1.8216150  |
| 22  | C      | 1.4332560  | 0.6757190  | -0.3248770 |
| 23  | H      | 0.4126250  | 2.4949830  | -0.5468080 |
| 24  | C      | 1.4211760  | -0.7173820 | 0.3354890  |
| 25  | H      | 0.3690750  | -2.5081430 | 0.5498220  |
| 26  | N      | 2.4752800  | -1.5804030 | -0.2212670 |
| 27  | N      | 2.5521980  | 1.4165560  | 0.2752270  |
| 28  | H      | 1.7052670  | 0.5235590  | -1.3715220 |
| 29  | H      | 2.3439830  | 1.6294450  | 1.2448310  |
| 30  | H      | 2.6751070  | 2.3053150  | -0.1949040 |
| 31  | H      | 3.3448320  | -1.0590670 | -0.2380980 |
| 32  | H      | 2.2602210  | -1.7919790 | -1.1901510 |
| 33  | H      | 1.6894880  | -0.5653910 | 1.3830190  |

Coordinates of conformer 1\_2

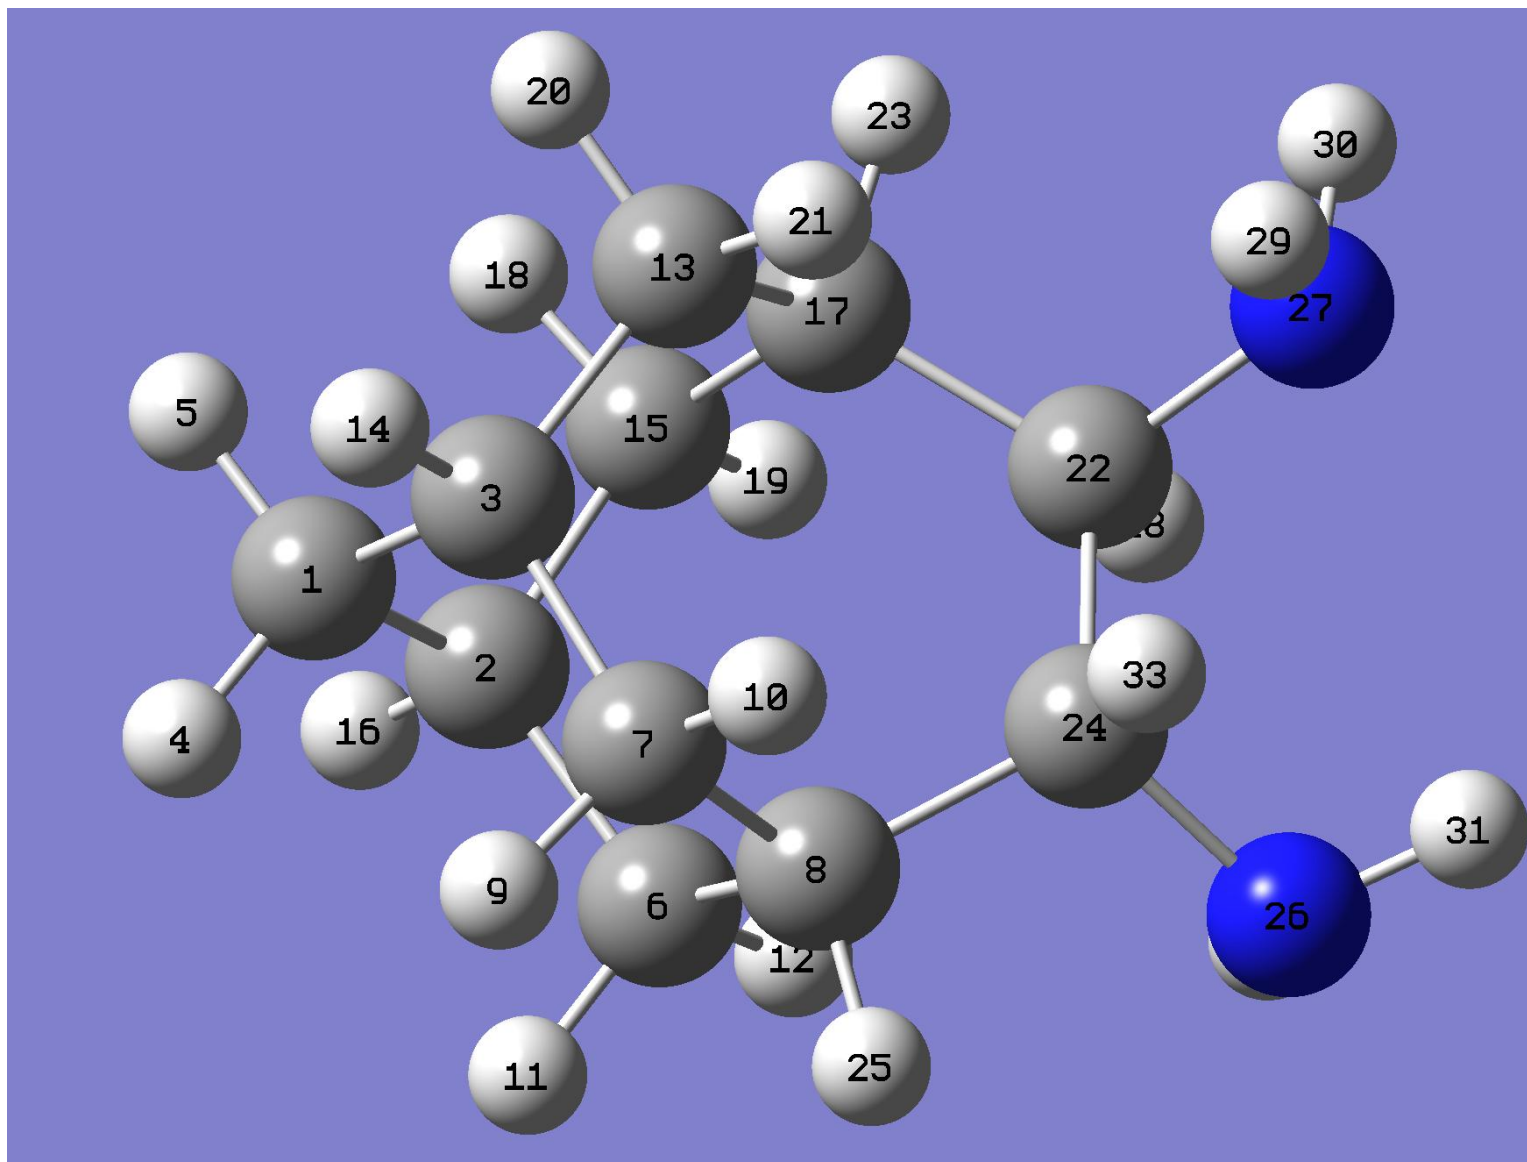

| Tag | Symbol | X          | Y          | Z          |
|-----|--------|------------|------------|------------|
| 1   | C      | 2.4692240  | 0.0108600  | 0.0046570  |
| 2   | C      | 1.5796240  | -0.2807950 | 1.2136250  |
| 3   | C      | 1.5822580  | 0.2925750  | -1.2085840 |
| 4   | H      | 3.1223920  | -0.8389970 | -0.2058850 |
| 5   | H      | 3.1121010  | 0.8678610  | 0.2183190  |
| 6   | C      | 0.6950850  | -1.5071410 | 0.9412220  |
| 7   | C      | 0.8025660  | -0.9789830 | -1.5333840 |
| 8   | C      | -0.0889230 | -1.4655200 | -0.3834340 |
| 9   | H      | 1.5245450  | -1.7644810 | -1.7701060 |
| 10  | H      | 0.1937020  | -0.8363020 | -2.4287200 |
| 11  | H      | 1.3457530  | -2.3842490 | 0.9144280  |
| 12  | H      | 0.0103540  | -1.6653740 | 1.7782770  |
| 13  | C      | 0.6832680  | 1.5089240  | -0.9412320 |
| 14  | H      | 2.2126710  | 0.5311690  | -2.0677100 |
| 15  | C      | 0.7860380  | 0.9831620  | 1.5350500  |
| 16  | H      | 2.2085320  | -0.5130930 | 2.0755660  |
| 17  | C      | -0.1049200 | 1.4539620  | 0.3786680  |
| 18  | H      | 1.4977290  | 1.7767160  | 1.7761390  |
| 19  | H      | 0.1731140  | 0.8330010  | 2.4266530  |
| 20  | H      | 1.3219610  | 2.3948310  | -0.9138060 |
| 21  | H      | -0.0018020 | 1.6560210  | -1.7804700 |
| 22  | C      | -1.4340230 | 0.6748000  | 0.3297270  |
| 23  | H      | -0.4056380 | 2.4781340  | 0.6123070  |
| 24  | C      | -1.4300140 | -0.7163300 | -0.3385680 |
| 25  | H      | -0.3726920 | -2.4920970 | -0.6160890 |
| 26  | N      | -2.4685660 | -1.5877360 | 0.2388210  |
| 27  | N      | -2.5359280 | 1.4359720  | -0.2779440 |
| 28  | H      | -1.7215340 | 0.5183080  | 1.3715830  |
| 29  | H      | -2.3120200 | 1.6555860  | -1.2424750 |
| 30  | H      | -2.6522050 | 2.3222130  | 0.1987480  |
| 31  | H      | -3.3721890 | -1.1593030 | 0.0713410  |
| 32  | H      | -2.3723590 | -1.6025550 | 1.2489690  |
| 33  | H      | -1.7220590 | -0.5681260 | -1.3796920 |

Coordinates of conformer 1\_7

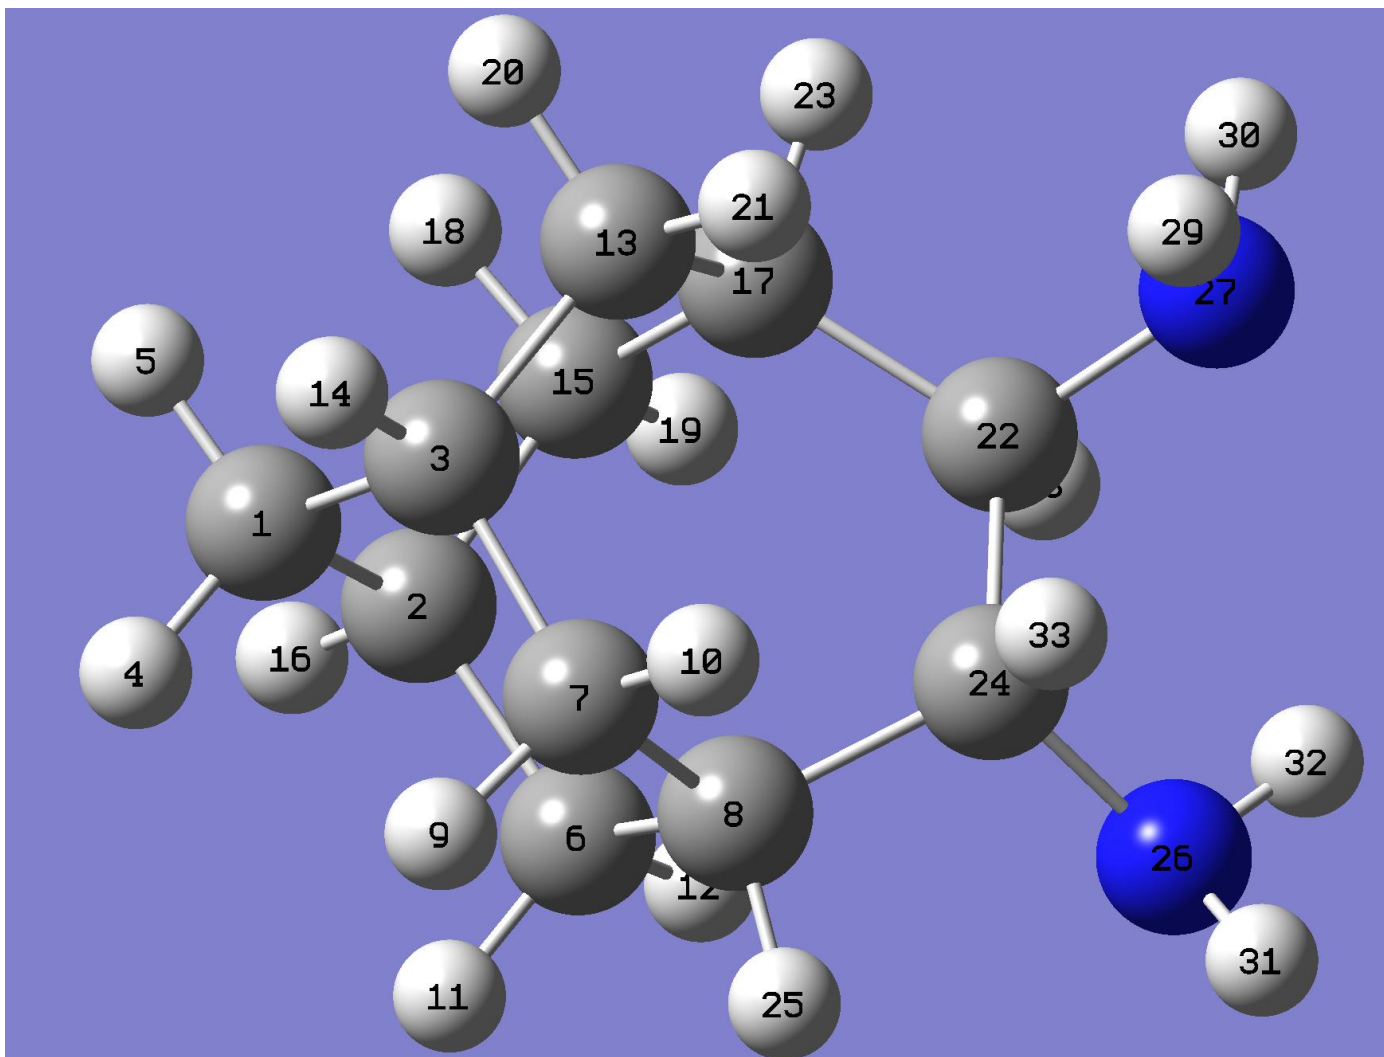

| Tag | Symbol | X          | Y          | Z          |
|-----|--------|------------|------------|------------|
| 1   | C      | 2.4711660  | -0.0158310 | 0.0026840  |
| 2   | C      | 1.5881360  | 0.2405470  | -1.2190450 |
| 3   | C      | 1.5773740  | -0.2534120 | 1.2203020  |
| 4   | H      | 3.1274590  | 0.8374460  | 0.1884010  |
| 5   | H      | 3.1110040  | -0.8824540 | -0.1792880 |
| 6   | C      | 0.7054230  | 1.4770630  | -0.9912570 |
| 7   | C      | 0.8029120  | 1.0325690  | 1.5004810  |
| 8   | C      | -0.0813560 | 1.4767550  | 0.3295030  |
| 9   | H      | 1.5271070  | 1.8226450  | 1.7138430  |
| 10  | H      | 0.1898330  | 0.9209310  | 2.3976370  |
| 11  | H      | 1.3572050  | 2.3539890  | -0.9932170 |
| 12  | H      | 0.0162090  | 1.6067470  | -1.8281170 |
| 13  | C      | 0.6739220  | -1.4743280 | 0.9874120  |
| 14  | H      | 2.2025550  | -0.4681900 | 2.0895140  |
| 15  | C      | 0.7911910  | -1.0299110 | -1.5049270 |
| 16  | H      | 2.2219230  | 0.4426550  | -2.0850440 |
| 17  | C      | -0.1063360 | -1.4630190 | -0.3388790 |
| 18  | H      | 1.5006850  | -1.8333600 | -1.7183350 |
| 19  | H      | 0.1825640  | -0.9042090 | -2.4030460 |
| 20  | H      | 1.3097960  | -2.3626560 | 0.9933840  |
| 21  | H      | -0.0164620 | -1.5915630 | 1.8269320  |
| 22  | C      | -1.4369340 | -0.6854540 | -0.3212720 |
| 23  | H      | -0.4050450 | -2.4944280 | -0.5402420 |
| 24  | C      | -1.4177640 | 0.7179720  | 0.3037020  |
| 25  | H      | -0.3723550 | 2.5110040  | 0.5253310  |
| 26  | N      | -2.4455050 | 1.5327100  | -0.3631410 |
| 27  | N      | -2.5417390 | -1.4263910 | 0.3030630  |
| 28  | H      | -1.7169550 | -0.5605030 | -1.3702650 |
| 29  | H      | -2.3231280 | -1.6190390 | 1.2744260  |
| 30  | H      | -2.6559820 | -2.3247900 | -0.1506450 |
| 31  | H      | -2.9099540 | 2.1468630  | 0.2916400  |
| 32  | H      | -3.1501830 | 0.9396310  | -0.7797290 |
| 33  | H      | -1.6919700 | 0.5773480  | 1.3551400  |

Coordinates of conformer 1\_8

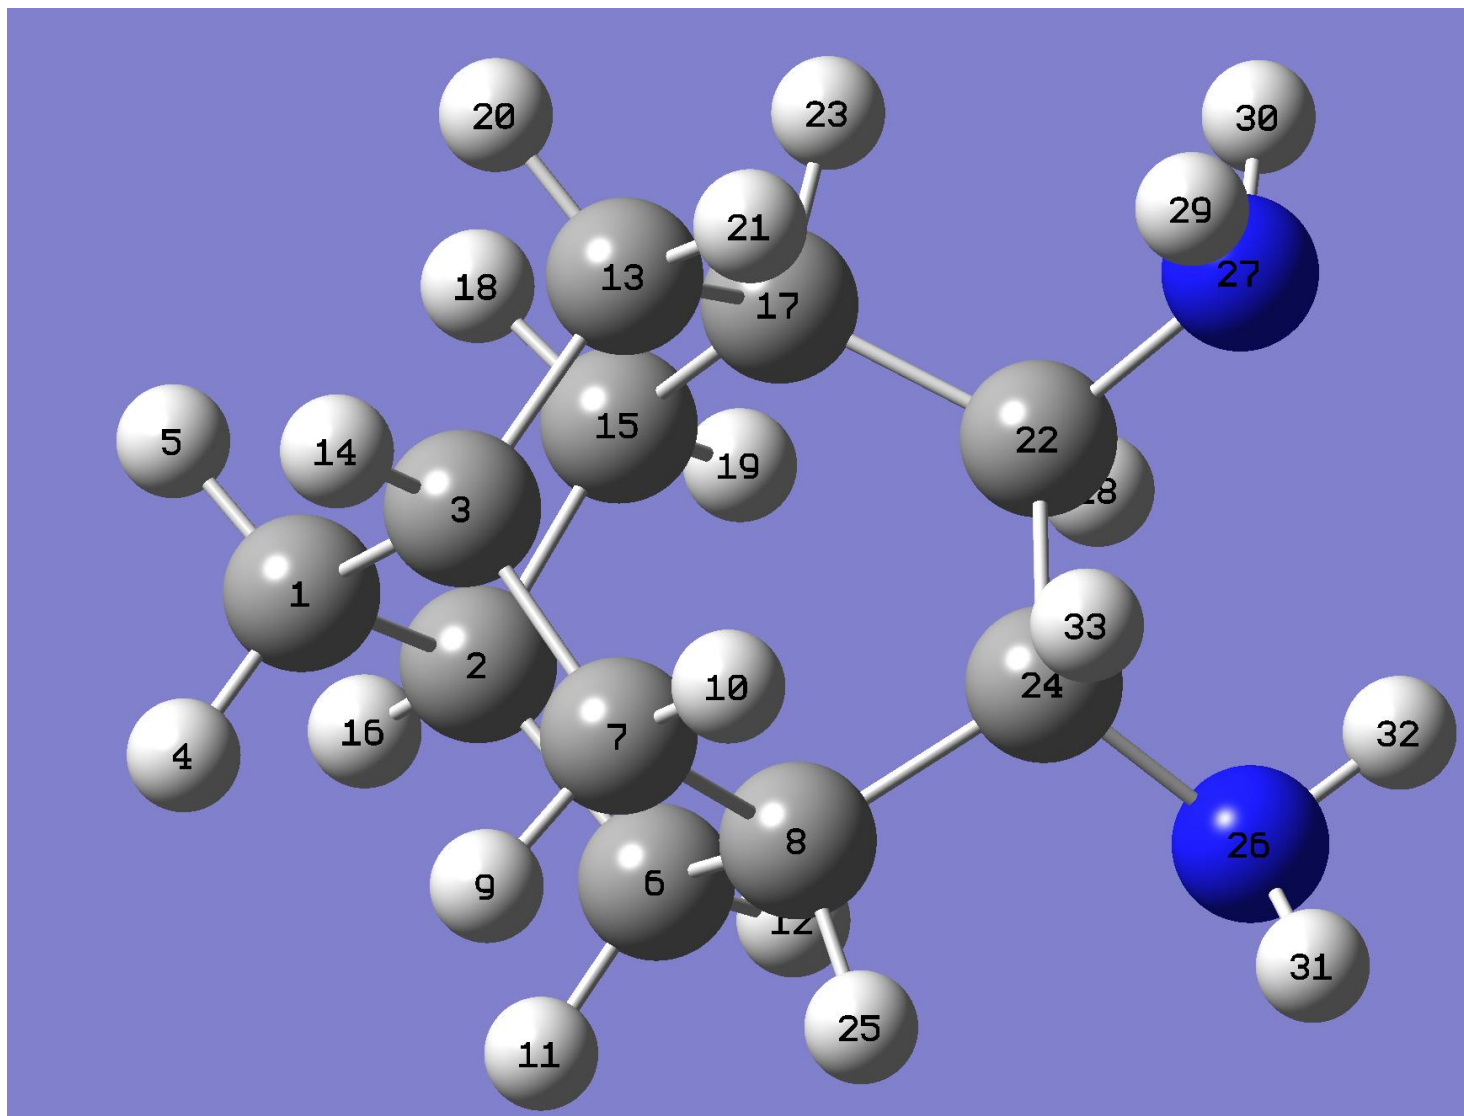

| Tag | Symbol | X          | Y          | Z          |
|-----|--------|------------|------------|------------|
| 1   | C      | 2.4705740  | -0.0183210 | 0.0058180  |
| 2   | C      | 1.5893190  | 0.2158760  | -1.2215380 |
| 3   | C      | 1.5744840  | -0.2326080 | 1.2260530  |
| 4   | H      | 3.1272140  | 0.8376830  | 0.1770900  |
| 5   | H      | 3.1099540  | -0.8885770 | -0.1594980 |
| 6   | C      | 0.7036490  | 1.4547850  | -1.0174400 |
| 7   | C      | 0.8047570  | 1.0612360  | 1.4825600  |
| 8   | C      | -0.0819530 | 1.4813600  | 0.3045740  |
| 9   | H      | 1.5320830  | 1.8533900  | 1.6766170  |
| 10  | H      | 0.1941530  | 0.9705110  | 2.3835500  |
| 11  | H      | 1.3535130  | 2.3328790  | -1.0375280 |
| 12  | H      | 0.0137020  | 1.5655270  | -1.8561290 |
| 13  | C      | 0.6682690  | -1.4558950 | 1.0133570  |
| 14  | H      | 2.1978560  | -0.4339060 | 2.0997500  |
| 15  | C      | 0.7957180  | -1.0611540 | -1.4865850 |
| 16  | H      | 2.2241590  | 0.4044970  | -2.0897780 |
| 17  | C      | -0.1071860 | -1.4702590 | -0.3161590 |
| 18  | H      | 1.5074270  | -1.8676820 | -1.6801200 |
| 19  | H      | 0.1912460  | -0.9542300 | -2.3898190 |
| 20  | H      | 1.3025860  | -2.3449700 | 1.0392990  |
| 21  | H      | -0.0255250 | -1.5553120 | 1.8523750  |
| 22  | C      | -1.4341620 | -0.6870220 | -0.3197060 |
| 23  | H      | -0.4073750 | -2.5048290 | -0.4979880 |
| 24  | C      | -1.4143960 | 0.7176420  | 0.2994190  |
| 25  | H      | -0.3712720 | 2.5202610  | 0.4799800  |
| 26  | N      | -2.4430350 | 1.5190010  | -0.3792840 |
| 27  | N      | -2.5510260 | -1.4159910 | 0.2990110  |
| 28  | H      | -1.7057560 | -0.5630090 | -1.3702190 |
| 29  | H      | -2.3377890 | -1.6150530 | 1.2703640  |
| 30  | H      | -2.6765850 | -2.3110280 | -0.1582260 |
| 31  | H      | -2.7537640 | 2.2772610  | 0.2147280  |
| 32  | H      | -3.2507100 | 0.9385630  | -0.5691720 |
| 33  | H      | -1.6811210 | 0.5830980  | 1.3545250  |

Coordinates of conformer 1\_9

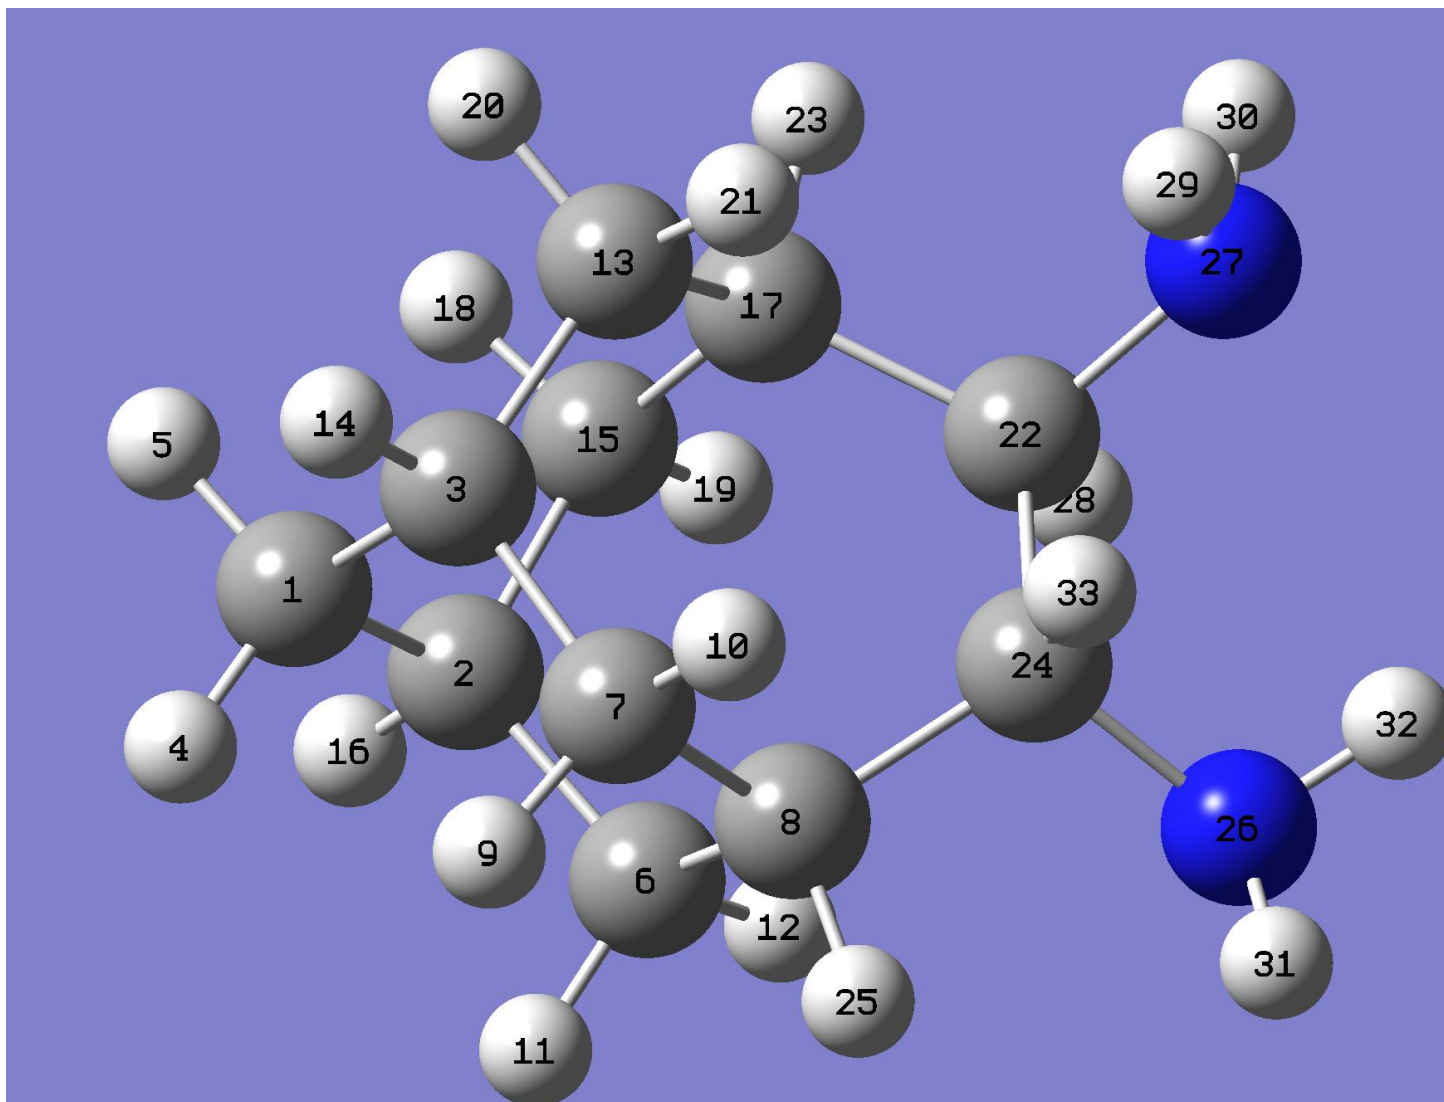

| Tag | Symbol | X          | Y          | Z          |
|-----|--------|------------|------------|------------|
| 1   | C      | 2.4699170  | -0.0112110 | 0.0098730  |
| 2   | C      | 1.5900730  | 0.2071470  | -1.2213550 |
| 3   | C      | 1.5721140  | -0.2176370 | 1.2302230  |
| 4   | H      | 3.1224860  | 0.8491960  | 0.1744730  |
| 5   | H      | 3.1133420  | -0.8801830 | -0.1460380 |
| 6   | C      | 0.6965190  | 1.4427680  | -1.0307750 |
| 7   | C      | 0.7989880  | 1.0766110  | 1.4735400  |
| 8   | C      | -0.0898280 | 1.4811700  | 0.2914480  |
| 9   | H      | 1.5244030  | 1.8728250  | 1.6578650  |
| 10  | H      | 0.1893850  | 0.9945560  | 2.3758730  |
| 11  | H      | 1.3412030  | 2.3243800  | -1.0600050 |
| 12  | H      | 0.0068570  | 1.5397820  | -1.8712680 |
| 13  | C      | 0.6697640  | -1.4456080 | 1.0268370  |
| 14  | H      | 2.1943460  | -0.4090950 | 2.1069160  |
| 15  | C      | 0.8045600  | -1.0768270 | -1.4761440 |
| 16  | H      | 2.2255930  | 0.3919960  | -2.0898850 |
| 17  | C      | -0.1017060 | -1.4753360 | -0.3048510 |
| 18  | H      | 1.5212660  | -1.8818970 | -1.6569990 |
| 19  | H      | 0.2035650  | -0.9832180 | -2.3830960 |
| 20  | H      | 1.3067550  | -2.3324080 | 1.0633360  |
| 21  | H      | -0.0263140 | -1.5388740 | 1.8646810  |
| 22  | C      | -1.4286910 | -0.6924630 | -0.3219170 |
| 23  | H      | -0.4000720 | -2.5121400 | -0.4766710 |
| 24  | C      | -1.4186710 | 0.7117240  | 0.2976910  |
| 25  | H      | -0.3787640 | 2.5220990  | 0.4566510  |
| 26  | N      | -2.4486700 | 1.5053620  | -0.3894180 |
| 27  | N      | -2.5507170 | -1.4204800 | 0.2909370  |
| 28  | H      | -1.6945850 | -0.5669900 | -1.3727460 |
| 29  | H      | -2.3395180 | -1.6256160 | 1.2615760  |
| 30  | H      | -2.6792640 | -2.3128580 | -0.1706730 |
| 31  | H      | -2.6040240 | 2.3718470  | 0.1124820  |
| 32  | H      | -3.3262140 | 0.9987240  | -0.3584760 |
| 33  | H      | -1.6829760 | 0.5816650  | 1.3539530  |

Coordinates of conformer 1\_10

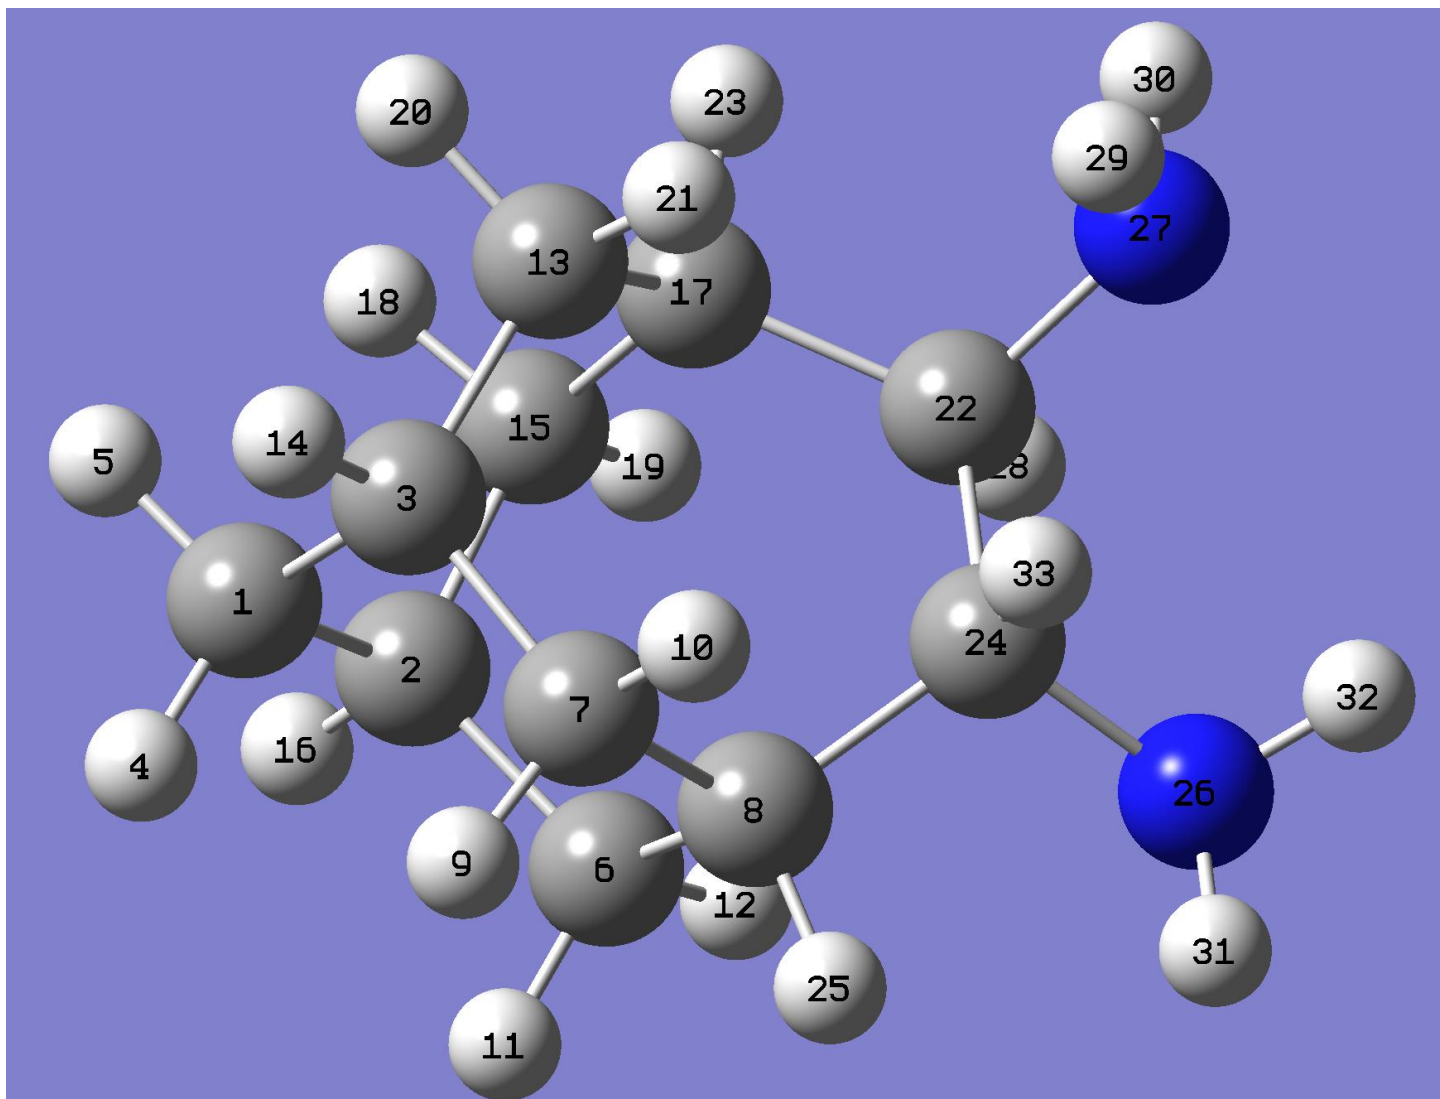

| Tag | Symbol | X          | Y          | Z          |
|-----|--------|------------|------------|------------|
| 1   | C      | 2.4690670  | 0.0038550  | 0.0135480  |
| 2   | C      | 1.5897480  | 0.2205740  | -1.2183340 |
| 3   | C      | 1.5708680  | -0.2160340 | 1.2312860  |
| 4   | H      | 3.1141450  | 0.8688670  | 0.1834970  |
| 5   | H      | 3.1199830  | -0.8589400 | -0.1453710 |
| 6   | C      | 0.6857170  | 1.4479180  | -1.0239680 |
| 7   | C      | 0.7862820  | 1.0700960  | 1.4792310  |
| 8   | C      | -0.1034970 | 1.4755110  | 0.2976620  |
| 9   | H      | 1.5047380  | 1.8713900  | 1.6687090  |
| 10  | H      | 0.1757300  | 0.9789480  | 2.3799340  |
| 11  | H      | 1.3234360  | 2.3347140  | -1.0476270 |
| 12  | H      | -0.0022780 | 1.5428430  | -1.8660890 |
| 13  | C      | 0.6787800  | -1.4498450 | 1.0205410  |
| 14  | H      | 2.1931030  | -0.4059580 | 2.1082970  |
| 15  | C      | 0.8146200  | -1.0681270 | -1.4798810 |
| 16  | H      | 2.2252370  | 0.4147980  | -2.0848170 |
| 17  | C      | -0.0911650 | -1.4764820 | -0.3117950 |
| 18  | H      | 1.5375640  | -1.8673360 | -1.6620340 |
| 19  | H      | 0.2147550  | -0.9755150 | -2.3876540 |
| 20  | H      | 1.3224920  | -2.3319840 | 1.0523540  |
| 21  | H      | -0.0172940 | -1.5532040 | 1.8572140  |
| 22  | C      | -1.4226080 | -0.7008680 | -0.3276520 |
| 23  | H      | -0.3841690 | -2.5139210 | -0.4891870 |
| 24  | C      | -1.4302880 | 0.7010110  | 0.2998570  |
| 25  | H      | -0.3925920 | 2.5153330  | 0.4693590  |
| 26  | N      | -2.4616020 | 1.4940000  | -0.3922710 |
| 27  | N      | -2.5398070 | -1.4417460 | 0.2805430  |
| 28  | H      | -1.6886880 | -0.5699860 | -1.3768690 |
| 29  | H      | -2.3271640 | -1.6492270 | 1.2504530  |
| 30  | H      | -2.6590620 | -2.3338570 | -0.1842360 |
| 31  | H      | -2.4626290 | 2.4356170  | -0.0161220 |
| 32  | H      | -3.3743500 | 1.1158210  | -0.1649100 |
| 33  | H      | -1.6982510 | 0.5701640  | 1.3542360  |

Coordinates of conformer 1\_24

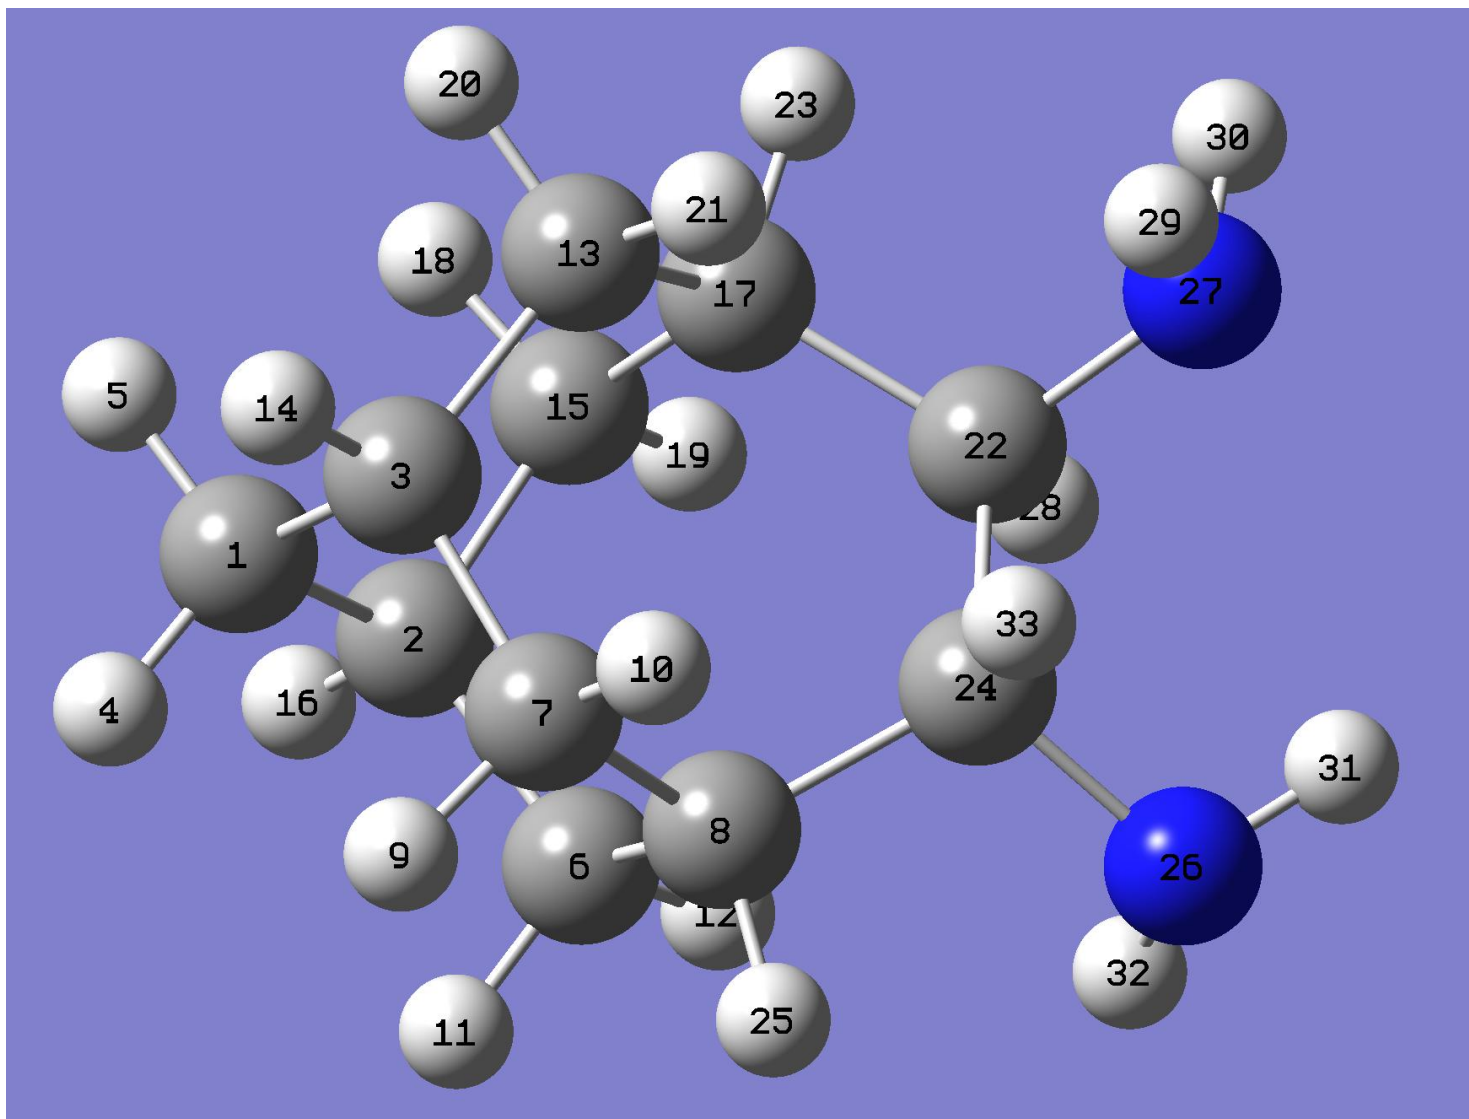

| Tag | Symbol | X          | Y          | Z          |
|-----|--------|------------|------------|------------|
| 1   | C      | -2.4679310 | 0.0216490  | -0.0054460 |
| 2   | C      | -1.5778420 | -0.2091750 | -1.2269860 |
| 3   | C      | -1.5800950 | 0.2344930  | 1.2210630  |
| 4   | H      | -3.1250040 | -0.8349620 | 0.1605520  |
| 5   | H      | -3.1066440 | 0.8913860  | -0.1752510 |
| 6   | C      | -0.6882990 | -1.4456710 | -1.0172050 |
| 7   | C      | -0.8194190 | -1.0632630 | 1.4820820  |
| 8   | C      | 0.0840490  | -1.4806430 | 0.3156260  |
| 9   | H      | -1.5531450 | -1.8535270 | 1.6589690  |
| 10  | H      | -0.2216830 | -0.9829390 | 2.3920140  |
| 11  | H      | -1.3340400 | -2.3261480 | -1.0479950 |
| 12  | H      | 0.0042140  | -1.5496500 | -1.8565280 |
| 13  | C      | -0.6678140 | 1.4555280  | 1.0160250  |
| 14  | H      | -2.2092260 | 0.4374420  | 2.0901270  |
| 15  | C      | -0.7903090 | 1.0729000  | -1.4852240 |
| 16  | H      | -2.2060120 | -0.4015120 | -2.0991790 |
| 17  | C      | 0.1113670  | 1.4748750  | -0.3118080 |
| 18  | H      | -1.5061710 | 1.8769330  | -1.6733250 |
| 19  | H      | -0.1857210 | 0.9753570  | -2.3895280 |
| 20  | H      | -1.2990280 | 2.3466440  | 1.0450230  |
| 21  | H      | 0.0244750  | 1.5481130  | 1.8570480  |
| 22  | C      | 1.4321190  | 0.6796910  | -0.3200620 |
| 23  | H      | 0.4156670  | 2.5094100  | -0.4873640 |
| 24  | C      | 1.4143540  | -0.7153750 | 0.3313790  |
| 25  | H      | 0.3695250  | -2.5191310 | 0.4919760  |
| 26  | N      | 2.4836900  | -1.5694690 | -0.2086920 |
| 27  | N      | 2.5646330  | 1.4040580  | 0.2728740  |
| 28  | H      | 1.6897480  | 0.5340730  | -1.3712810 |
| 29  | H      | 2.3754830  | 1.6001770  | 1.2499130  |
| 30  | H      | 2.6850440  | 2.2999720  | -0.1840360 |
| 31  | H      | 3.3005360  | -1.0039790 | -0.4067470 |
| 32  | H      | 2.1848450  | -1.9813450 | -1.0852920 |
| 33  | H      | 1.6578010  | -0.5584920 | 1.3849660  |

Coordinates of conformer 2\_7

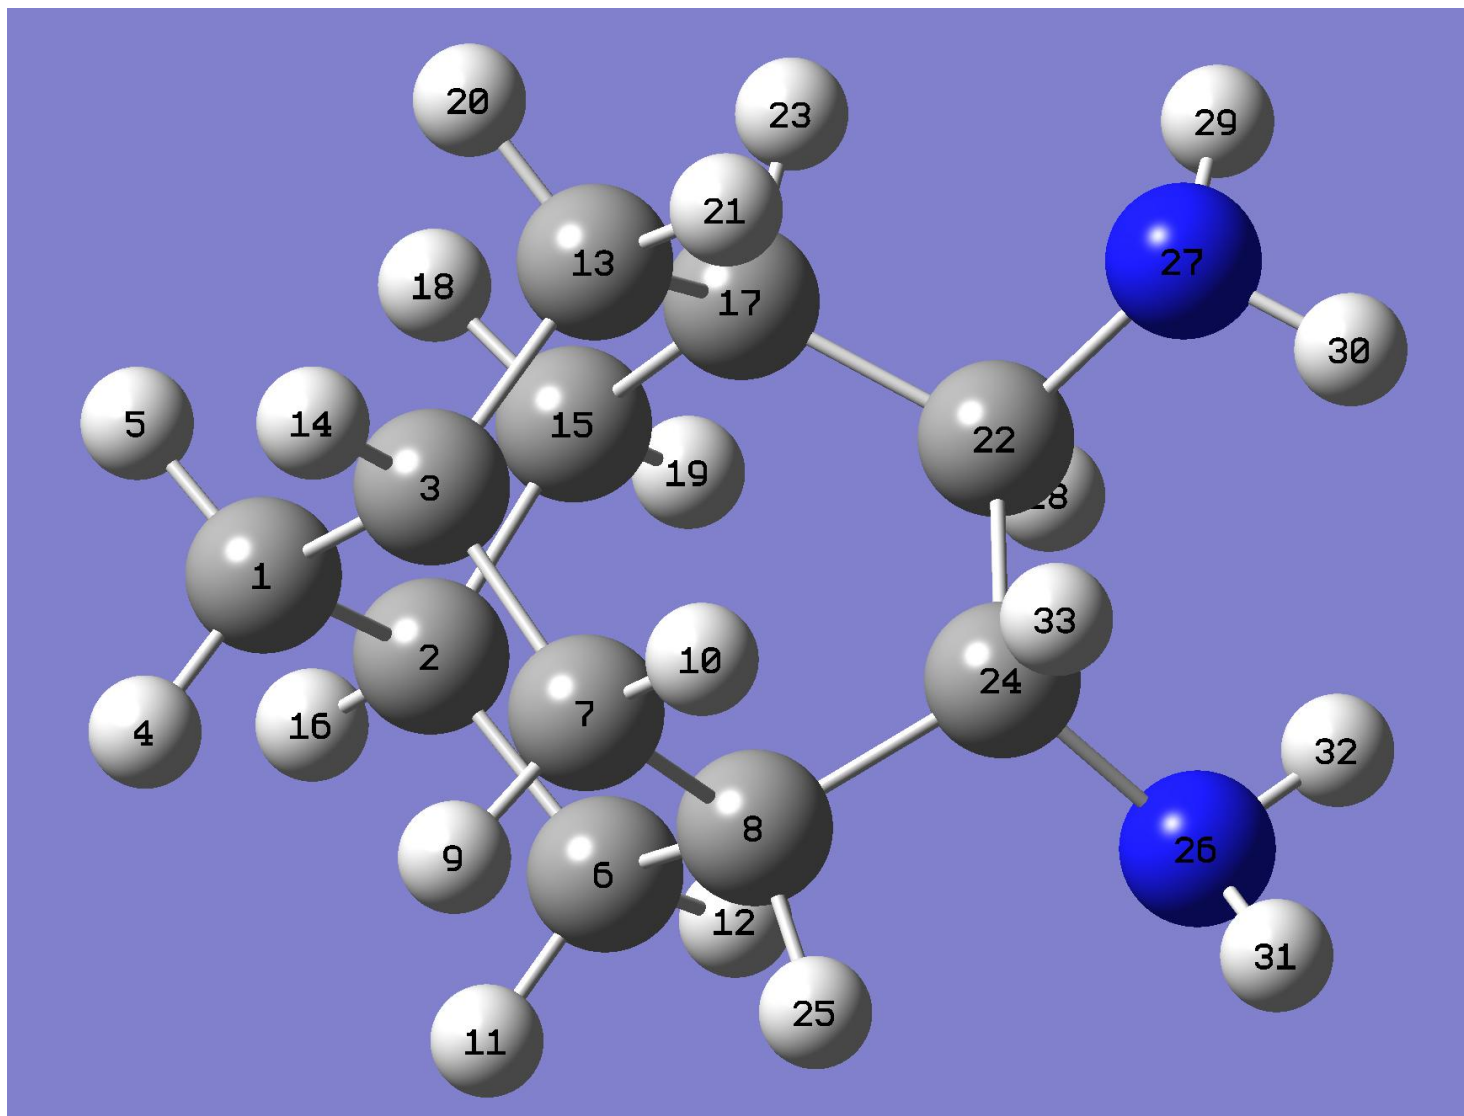

| Tag | Symbol | X          | Y          | Z          |
|-----|--------|------------|------------|------------|
| 1   | C      | 2.4722280  | 0.0034210  | 0.0044010  |
| 2   | C      | 1.5812410  | -0.2381000 | 1.2232670  |
| 3   | C      | 1.5857750  | 0.2402250  | -1.2185990 |
| 4   | H      | 3.1229210  | -0.8563010 | -0.1717730 |
| 5   | H      | 3.1178170  | 0.8663810  | 0.1836300  |
| 6   | C      | 0.6926270  | -1.4707960 | 0.9976350  |
| 7   | C      | 0.8032020  | -1.0413910 | -1.4970780 |
| 8   | C      | -0.0878940 | -1.4743750 | -0.3273020 |
| 9   | H      | 1.5219240  | -1.8381180 | -1.7045290 |
| 10  | H      | 0.1938190  | -0.9275630 | -2.3962740 |
| 11  | H      | 1.3402020  | -2.3508520 | 1.0068330  |
| 12  | H      | -0.0013750 | -1.5929360 | 1.8314590  |
| 13  | C      | 0.6888740  | 1.4675710  | -0.9977160 |
| 14  | H      | 2.2164660  | 0.4458330  | -2.0861310 |
| 15  | C      | 0.7914440  | 1.0399140  | 1.4982240  |
| 16  | H      | 2.2090230  | -0.4395680 | 2.0938750  |
| 17  | C      | -0.0970800 | 1.4694970  | 0.3248260  |
| 18  | H      | 1.5058850  | 1.8399000  | 1.7077260  |
| 19  | H      | 0.1794790  | 0.9243020  | 2.3953180  |
| 20  | H      | 1.3307960  | 2.3517470  | -1.0047060 |
| 21  | H      | -0.0021650 | 1.5838320  | -1.8345120 |
| 22  | C      | -1.4251340 | 0.6989500  | 0.3053250  |
| 23  | H      | -0.3915790 | 2.5047370  | 0.5150850  |
| 24  | C      | -1.4192010 | -0.7077750 | -0.3094830 |
| 25  | H      | -0.3829790 | -2.5088800 | -0.5181810 |
| 26  | N      | -2.4371180 | -1.5176100 | 0.3838400  |
| 27  | N      | -2.4329690 | 1.5029400  | -0.4075390 |
| 28  | H      | -1.7101080 | 0.5731890  | 1.3565800  |
| 29  | H      | -2.6391200 | 2.3427420  | 0.1204140  |
| 30  | H      | -3.3053450 | 0.9928510  | -0.4822500 |
| 31  | H      | -2.8343740 | -2.2108220 | -0.2363560 |
| 32  | H      | -3.1969520 | -0.9455990 | 0.7279260  |
| 33  | H      | -1.7002190 | -0.5750430 | -1.3592400 |

Coordinates of conformer 2\_8

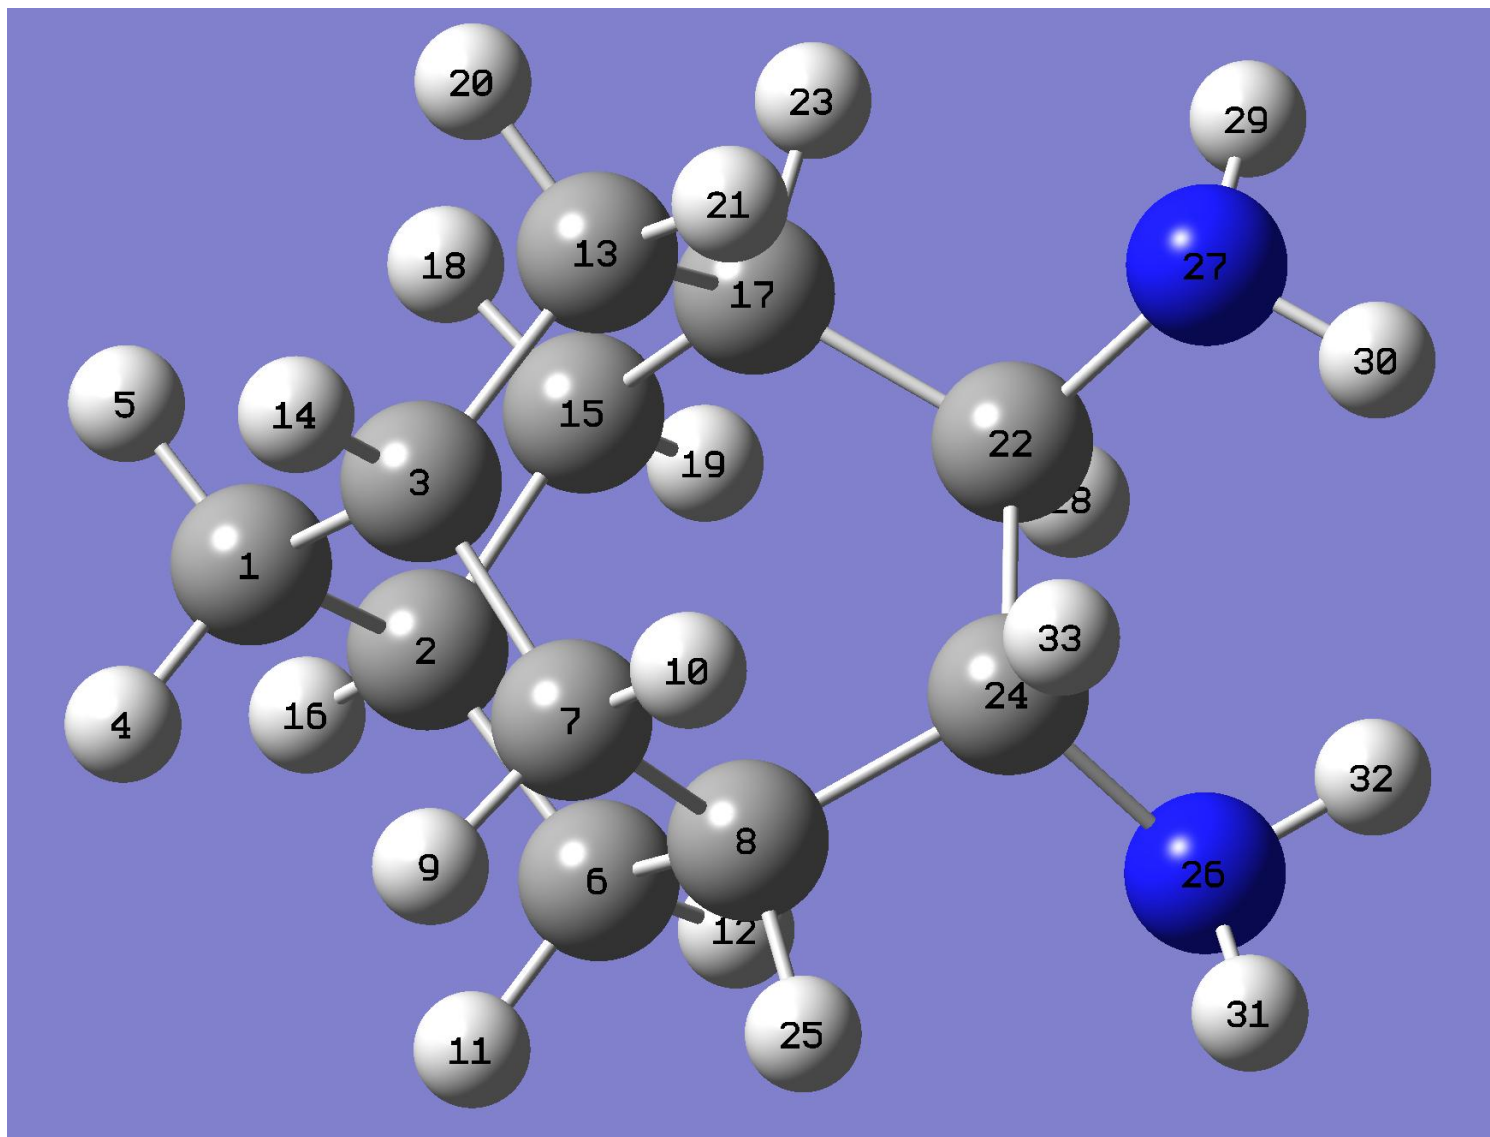

| Tag | Symbol | X          | Y          | Z          |
|-----|--------|------------|------------|------------|
| 1   | C      | 2.4704400  | 0.0020390  | 0.0013740  |
| 2   | C      | 1.5810940  | -0.2455490 | 1.2201170  |
| 3   | C      | 1.5822670  | 0.2474100  | -1.2186590 |
| 4   | H      | 3.1197250  | -0.8575090 | -0.1808030 |
| 5   | H      | 3.1174170  | 0.8631330  | 0.1844900  |
| 6   | C      | 0.6906200  | -1.4754900 | 0.9887060  |
| 7   | C      | 0.7969490  | -1.0310400 | -1.5038870 |
| 8   | C      | -0.0926890 | -1.4703920 | -0.3351170 |
| 9   | H      | 1.5140360  | -1.8276480 | -1.7173230 |
| 10  | H      | 0.1863400  | -0.9107100 | -2.4012690 |
| 11  | H      | 1.3369820  | -2.3564950 | 0.9905160  |
| 12  | H      | -0.0018170 | -1.6013750 | 1.8229260  |
| 13  | C      | 0.6883010  | 1.4750970  | -0.9886710 |
| 14  | H      | 2.2117730  | 0.4568040  | -2.0861260 |
| 15  | C      | 0.7923790  | 1.0310530  | 1.5042560  |
| 16  | H      | 2.2098610  | -0.4531800 | 2.0885450  |
| 17  | C      | -0.0967360 | 1.4689840  | 0.3343960  |
| 18  | H      | 1.5074130  | 1.8292590  | 1.7185590  |
| 19  | H      | 0.1809480  | 0.9094910  | 2.4008840  |
| 20  | H      | 1.3324100  | 2.3577400  | -0.9897560 |
| 21  | H      | -0.0031550 | 1.5988530  | -1.8239750 |
| 22  | C      | -1.4260600 | 0.7006460  | 0.3101590  |
| 23  | H      | -0.3897610 | 2.5033130  | 0.5319270  |
| 24  | C      | -1.4232020 | -0.7039550 | -0.3116080 |
| 25  | H      | -0.3852470 | -2.5047820 | -0.5327150 |
| 26  | N      | -2.4275950 | -1.5184810 | 0.3960520  |
| 27  | N      | -2.4296780 | 1.5129480  | -0.4013270 |
| 28  | H      | -1.7149010 | 0.5686130  | 1.3586160  |
| 29  | H      | -2.6278440 | 2.3539610  | 0.1277110  |
| 30  | H      | -3.3073450 | 1.0120410  | -0.4762610 |
| 31  | H      | -2.6711360 | -2.3298000 | -0.1591350 |
| 32  | H      | -3.2839160 | -0.9953510 | 0.5335550  |
| 33  | H      | -1.7110470 | -0.5704400 | -1.3598440 |

Coordinates of conformer 2\_9

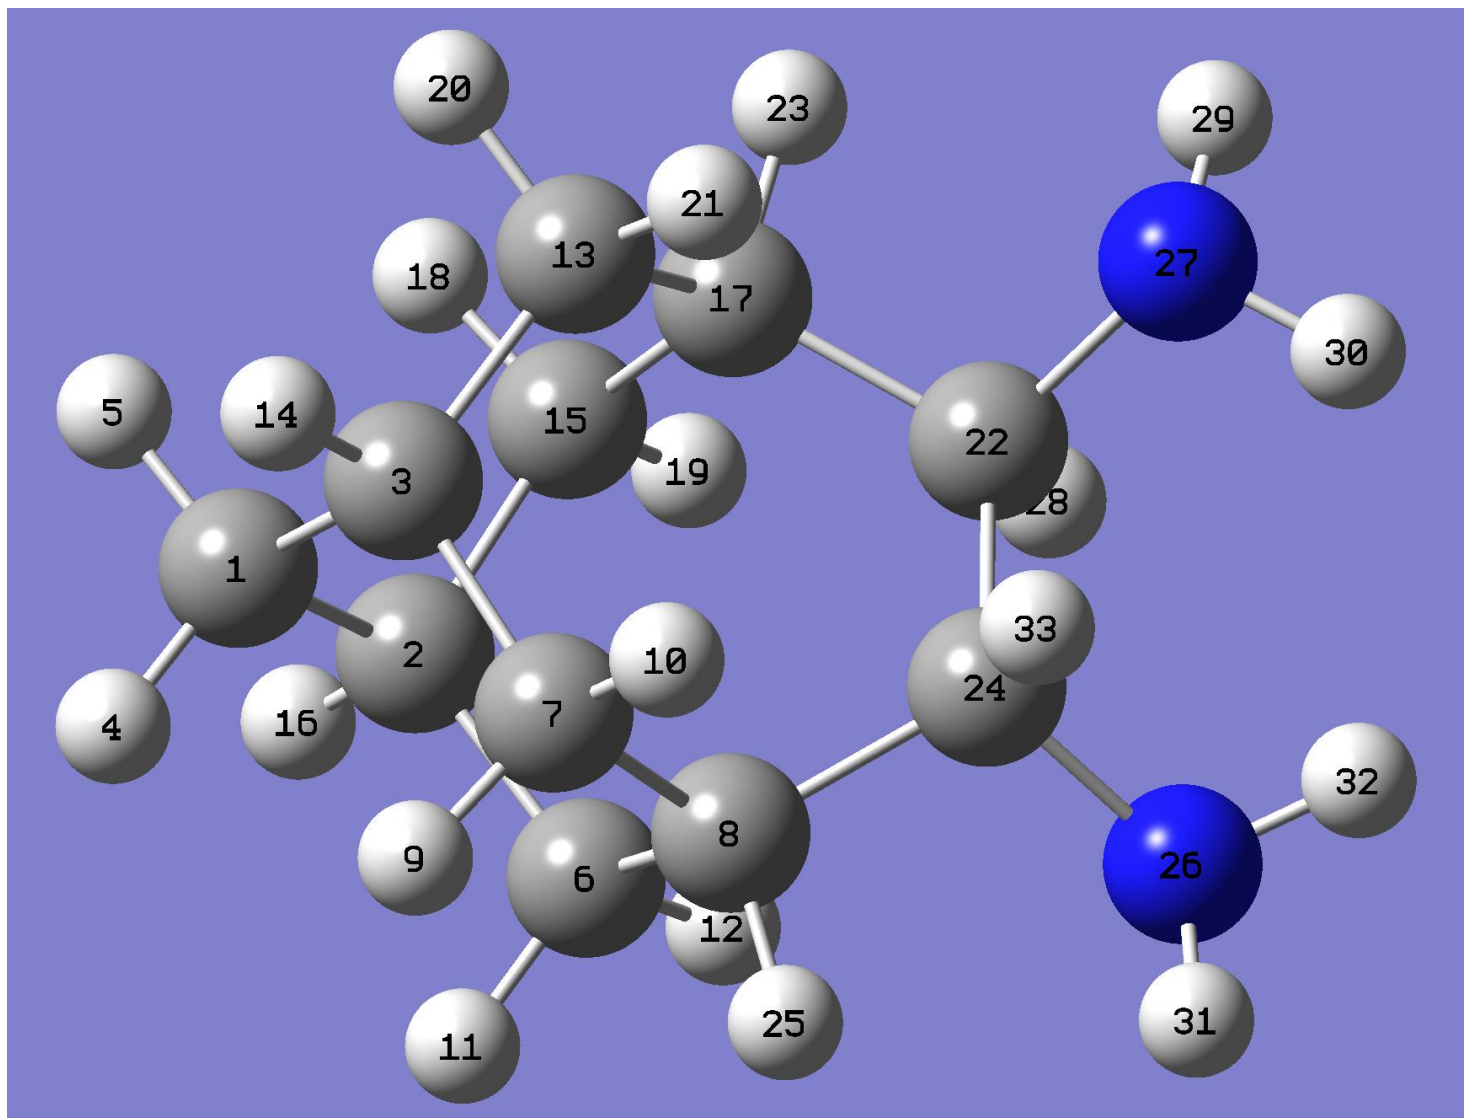

| Tag | Symbol | X          | Y          | Z          |
|-----|--------|------------|------------|------------|
| 1   | C      | -2.4698030 | -0.0066340 | 0.0021110  |
| 2   | C      | -1.5813930 | -0.2493920 | -1.2181710 |
| 3   | C      | -1.5806870 | 0.2431250  | 1.2205060  |
| 4   | H      | -3.1144760 | -0.8695070 | 0.1853080  |
| 5   | H      | -3.1214280 | 0.8512720  | -0.1797370 |
| 6   | C      | -0.6836650 | -1.4744220 | -0.9890450 |
| 7   | C      | -0.7885640 | -1.0312380 | 1.5039920  |
| 8   | C      | 0.1019380  | -1.4669720 | 0.3342840  |
| 9   | H      | -1.5014800 | -1.8316550 | 1.7173950  |
| 10  | H      | -0.1777400 | -0.9087930 | 2.4008740  |
| 11  | H      | -1.3250270 | -2.3591100 | -0.9899930 |
| 12  | H      | 0.0072050  | -1.5956070 | -1.8253130 |
| 13  | C      | -0.6926920 | 1.4746850  | 0.9893090  |
| 14  | H      | -2.2097980 | 0.4485680  | 2.0893050  |
| 15  | C      | -0.7993840 | 1.0309620  | -1.5029110 |
| 16  | H      | -2.2106720 | -0.4599770 | -2.0856120 |
| 17  | C      | 0.0906980  | 1.4704340  | -0.3345900 |
| 18  | H      | -1.5184670 | 1.8263820  | -1.7143810 |
| 19  | H      | -0.1895530 | 0.9131090  | -2.4011300 |
| 20  | H      | -1.3404030 | 2.3547680  | 0.9908490  |
| 21  | H      | -0.0008090 | 1.6016910  | 1.8239170  |
| 22  | C      | 1.4228820  | 0.7065970  | -0.3136330 |
| 23  | H      | 0.3801190  | 2.5058860  | -0.5328760 |
| 24  | C      | 1.4312340  | -0.6981810 | 0.3118880  |
| 25  | H      | 0.3928980  | -2.5019090 | 0.5329910  |
| 26  | N      | 2.4339890  | -1.5124190 | -0.4016760 |
| 27  | N      | 2.4248130  | 1.5277740  | 0.3914310  |
| 28  | H      | 1.7095060  | 0.5709580  | -1.3615410 |
| 29  | H      | 2.6019610  | 2.3759480  | -0.1340080 |
| 30  | H      | 3.3122110  | 1.0416720  | 0.4469220  |
| 31  | H      | 2.5191210  | -2.4130640 | 0.0560770  |
| 32  | H      | 3.3511320  | -1.0861290 | -0.3296080 |
| 33  | H      | 1.7207110  | -0.5657660 | 1.3598390  |

Coordinates of conformer 2\_14

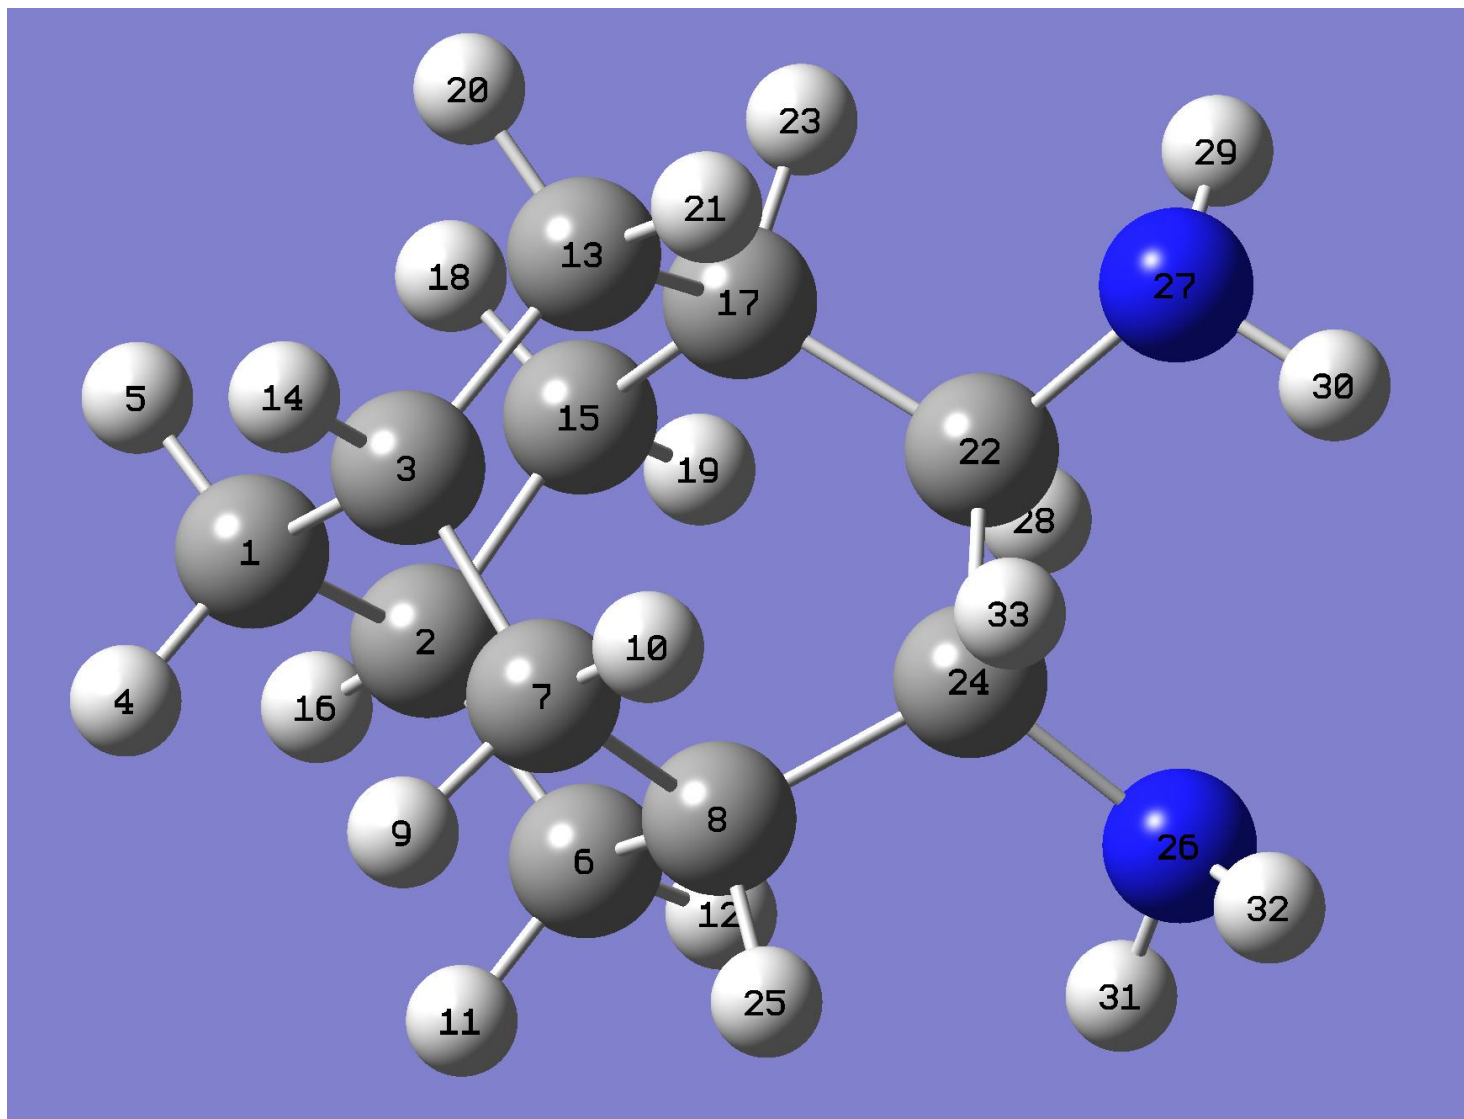

| Tag | Symbol | X          | Y          | Z          |
|-----|--------|------------|------------|------------|
| 1   | C      | -2.4724730 | -0.0377730 | 0.0079170  |
| 2   | C      | -1.5835370 | -0.2003100 | -1.2255250 |
| 3   | C      | -1.5834240 | 0.1594040  | 1.2361330  |
| 4   | H      | -3.1034860 | -0.9185790 | 0.1472460  |
| 5   | H      | -3.1371520 | 0.8182580  | -0.1282510 |
| 6   | C      | -0.6631600 | -1.4219120 | -1.0625070 |
| 7   | C      | -0.7831150 | -1.1228650 | 1.4497020  |
| 8   | C      | 0.1204220  | -1.4793890 | 0.2626080  |
| 9   | H      | -1.4912480 | -1.9399530 | 1.6093110  |
| 10  | H      | -0.1787510 | -1.0508210 | 2.3561510  |
| 11  | H      | -1.2907650 | -2.3145450 | -1.1156950 |
| 12  | H      | 0.0258060  | -1.4844450 | -1.9087830 |
| 13  | C      | -0.7057140 | 1.4103090  | 1.0699050  |
| 14  | H      | -2.2127170 | 0.3139790  | 2.1150560  |
| 15  | C      | -0.8336700 | 1.1124420  | -1.4419470 |
| 16  | H      | -2.2114240 | -0.3786690 | -2.1009350 |
| 17  | C      | 0.0647190  | 1.4956190  | -0.2598670 |
| 18  | H      | -1.5743300 | 1.9014030  | -1.5944710 |
| 19  | H      | -0.2343050 | 1.0655310  | -2.3534220 |
| 20  | H      | -1.3604160 | 2.2828120  | 1.1318040  |
| 21  | H      | -0.0079580 | 1.4917770  | 1.9055130  |
| 22  | C      | 1.3986160  | 0.7366500  | -0.3084150 |
| 23  | H      | 0.3399770  | 2.5441260  | -0.3985660 |
| 24  | C      | 1.4344920  | -0.6786910 | 0.2874030  |
| 25  | H      | 0.4321460  | -2.5160920 | 0.4047260  |
| 26  | N      | 2.5652670  | -1.4015910 | -0.3242890 |
| 27  | N      | 2.4406210  | 1.5219860  | 0.3686750  |
| 28  | H      | 1.6434920  | 0.6201450  | -1.3696620 |
| 29  | H      | 2.5961380  | 2.3892080  | -0.1318850 |
| 30  | H      | 3.3153470  | 1.0106570  | 0.3257860  |
| 31  | H      | 2.2504340  | -2.0750170 | -1.0102070 |
| 32  | H      | 3.1057330  | -1.8916230 | 0.3737030  |
| 33  | H      | 1.6933230  | -0.5518230 | 1.3394370  |

Coordinates of conformer 2\_15

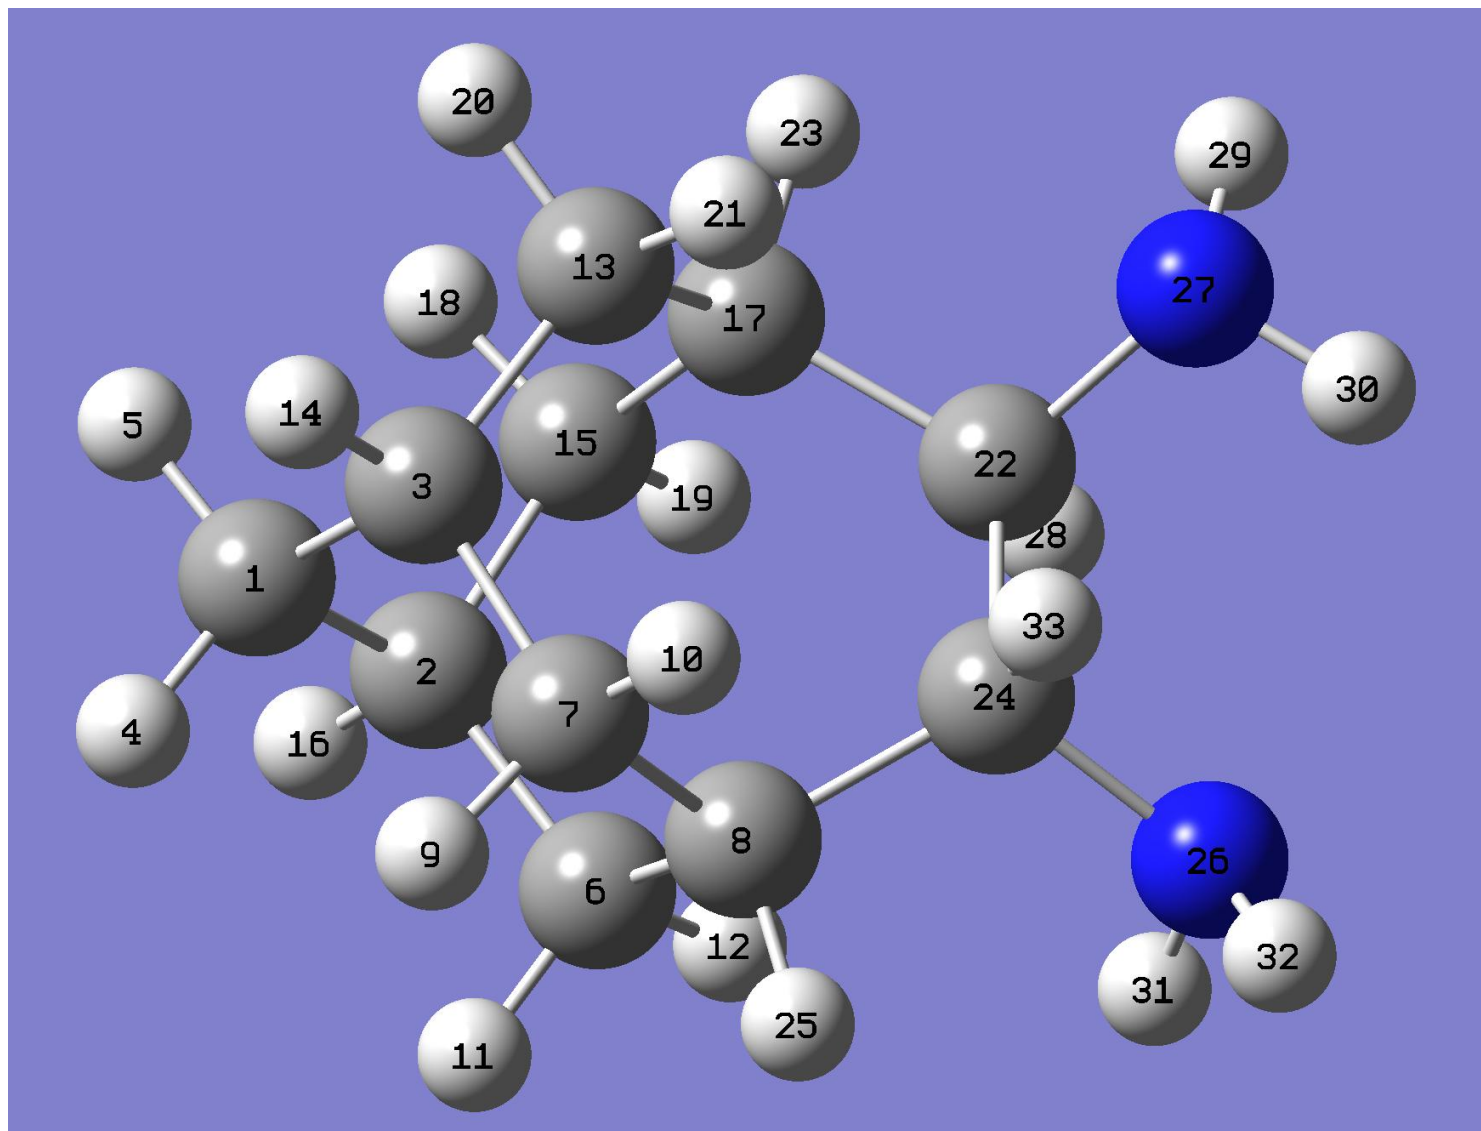

| Tag | Symbol | X          | Y          | Z          |
|-----|--------|------------|------------|------------|
| 1   | C      | 2.4715520  | -0.0293710 | -0.0035010 |
| 2   | C      | 1.5804260  | -0.2124680 | 1.2254340  |
| 3   | C      | 1.5848130  | 0.1808120  | -1.2312040 |
| 4   | H      | 3.1065680  | -0.9056540 | -0.1528580 |
| 5   | H      | 3.1323780  | 0.8275030  | 0.1456880  |
| 6   | C      | 0.6669160  | -1.4361290 | 1.0437260  |
| 7   | C      | 0.7880410  | -1.1004610 | -1.4639920 |
| 8   | C      | -0.1145110 | -1.4772830 | -0.2824960 |
| 9   | H      | 1.4981610  | -1.9130900 | -1.6370100 |
| 10  | H      | 0.1831470  | -1.0154520 | -2.3691120 |
| 11  | H      | 1.2981590  | -2.3267760 | 1.0860430  |
| 12  | H      | -0.0229590 | -1.5137490 | 1.8882450  |
| 13  | C      | 0.7031570  | 1.4266580  | -1.0504170 |
| 14  | H      | 2.2157490  | 0.3489770  | -2.1064540 |
| 15  | C      | 0.8219200  | 1.0926490  | 1.4576230  |
| 16  | H      | 2.2070610  | -0.3986830 | 2.1001230  |
| 17  | C      | -0.0725180 | 1.4902170  | 0.2772760  |
| 18  | H      | 1.5571580  | 1.8834010  | 1.6260990  |
| 19  | H      | 0.2184660  | 1.0284340  | 2.3654440  |
| 20  | H      | 1.3554060  | 2.3019450  | -1.0972210 |
| 21  | H      | 0.0079380  | 1.5181890  | -1.8870280 |
| 22  | C      | -1.4058820 | 0.7294940  | 0.3064420  |
| 23  | H      | -0.3513240 | 2.5357680  | 0.4303400  |
| 24  | C      | -1.4330830 | -0.6822270 | -0.2970400 |
| 25  | H      | -0.4232930 | -2.5129770 | -0.4390520 |
| 26  | N      | -2.5622700 | -1.4033650 | 0.3126610  |
| 27  | N      | -2.4411240 | 1.5178470  | -0.3768690 |
| 28  | H      | -1.6607640 | 0.6087140  | 1.3655610  |
| 29  | H      | -2.6116920 | 2.3766070  | 0.1331340  |
| 30  | H      | -3.3114680 | 0.9979750  | -0.3572170 |
| 31  | H      | -2.2713630 | -1.9010520 | 1.1452660  |
| 32  | H      | -2.9482160 | -2.0771380 | -0.3344370 |
| 33  | H      | -1.7003490 | -0.5556570 | -1.3472080 |

Coordinates of conformer 2\_16

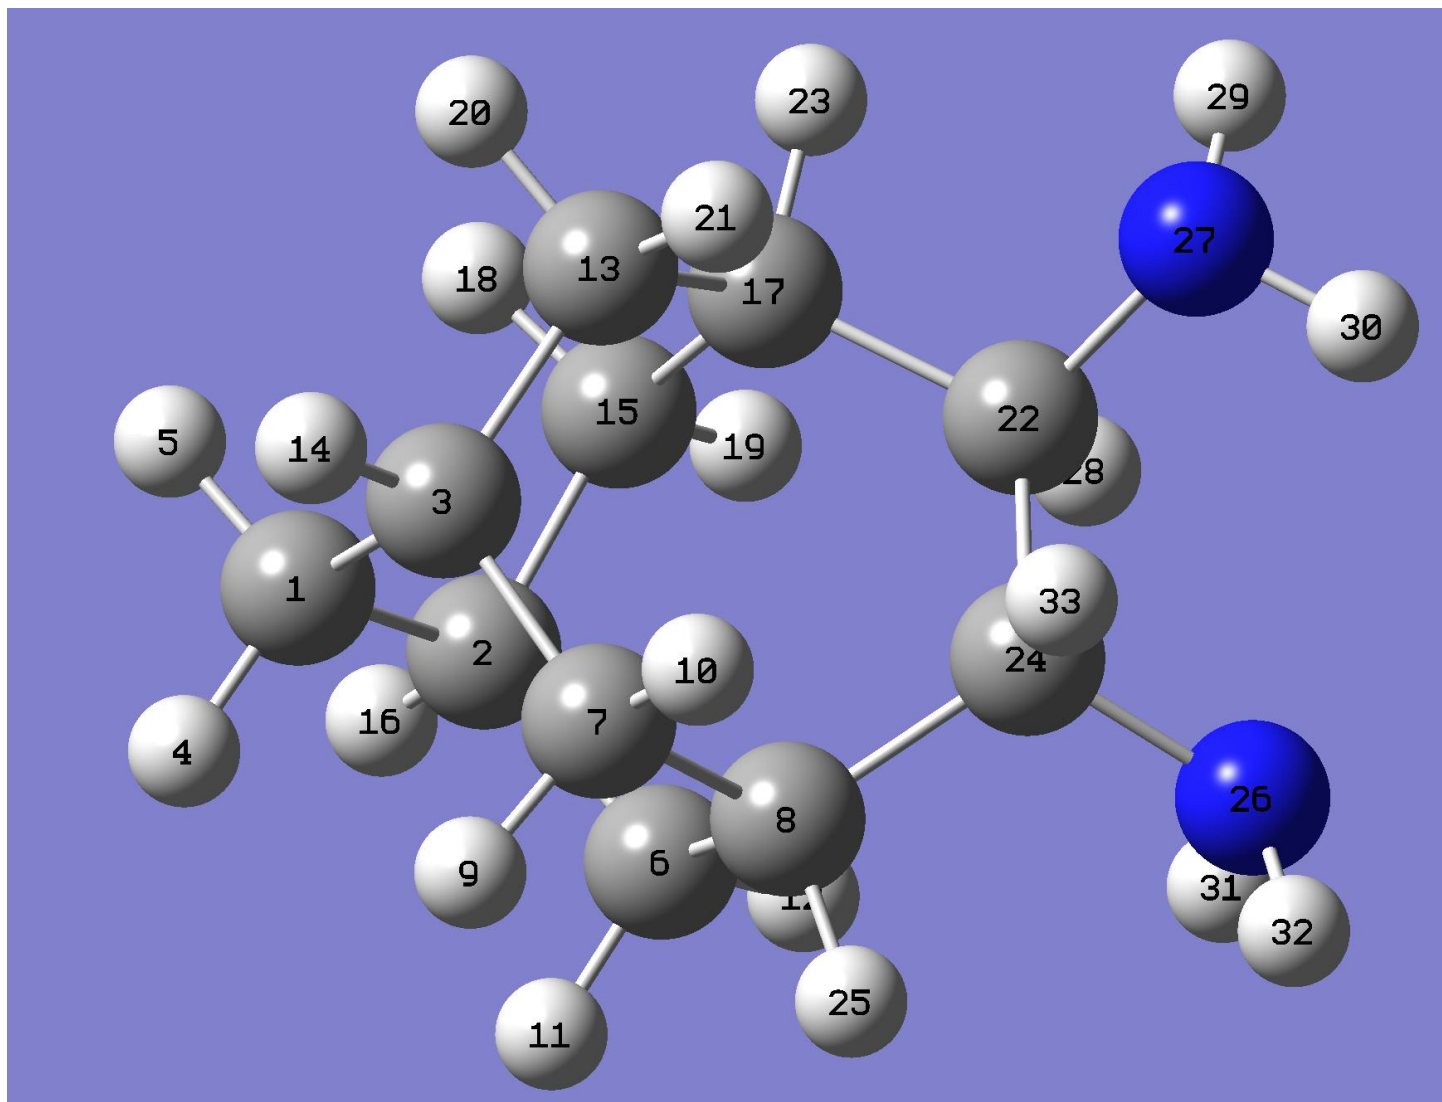

| Tag | Symbol | X          | Y          | Z          |
|-----|--------|------------|------------|------------|
| 1   | C      | 2.4706270  | -0.0190610 | 0.0038410  |
| 2   | C      | 1.5758500  | -0.2162230 | 1.2279440  |
| 3   | C      | 1.5876670  | 0.1966350  | -1.2256260 |
| 4   | H      | 3.1103750  | -0.8911380 | -0.1498830 |
| 5   | H      | 3.1268350  | 0.8397330  | 0.1622270  |
| 6   | C      | 0.6687450  | -1.4422600 | 1.0330990  |
| 7   | C      | 0.7969650  | -1.0859240 | -1.4717540 |
| 8   | C      | -0.1072860 | -1.4760070 | -0.2960120 |
| 9   | H      | 1.5106010  | -1.8942090 | -1.6504640 |
| 10  | H      | 0.1939060  | -0.9949750 | -2.3775990 |
| 11  | H      | 1.3032580  | -2.3307630 | 1.0714170  |
| 12  | H      | -0.0245260 | -1.5297190 | 1.8738950  |
| 13  | C      | 0.6995720  | 1.4367740  | -1.0382290 |
| 14  | H      | 2.2211580  | 0.3747410  | -2.0970540 |
| 15  | C      | 0.8088900  | 1.0824980  | 1.4675130  |
| 16  | H      | 2.2001270  | -0.4059620 | 2.1035640  |
| 17  | C      | -0.0821050 | 1.4850600  | 0.2864030  |
| 18  | H      | 1.5384410  | 1.8762950  | 1.6459390  |
| 19  | H      | 0.2017360  | 1.0072280  | 2.3720820  |
| 20  | H      | 1.3477030  | 2.3156030  | -1.0745460 |
| 21  | H      | 0.0073350  | 1.5322160  | -1.8768310 |
| 22  | C      | -1.4130810 | 0.7196440  | 0.3010020  |
| 23  | H      | -0.3670880 | 2.5277720  | 0.4470630  |
| 24  | C      | -1.4308270 | -0.6878150 | -0.3111260 |
| 25  | H      | -0.4104820 | -2.5122360 | -0.4616690 |
| 26  | N      | -2.5564310 | -1.4103280 | 0.3005500  |
| 27  | N      | -2.4448880 | 1.5110280  | -0.3845600 |
| 28  | H      | -1.6740560 | 0.5933320  | 1.3584890  |
| 29  | H      | -2.6259450 | 2.3629250  | 0.1331380  |
| 30  | H      | -3.3122450 | 0.9862370  | -0.3838330 |
| 31  | H      | -2.3104820 | -1.7228890 | 1.2330820  |
| 32  | H      | -2.7789430 | -2.2356500 | -0.2415860 |
| 33  | H      | -1.6985660 | -0.5633670 | -1.3616960 |

Coordinates of conformer 2\_17

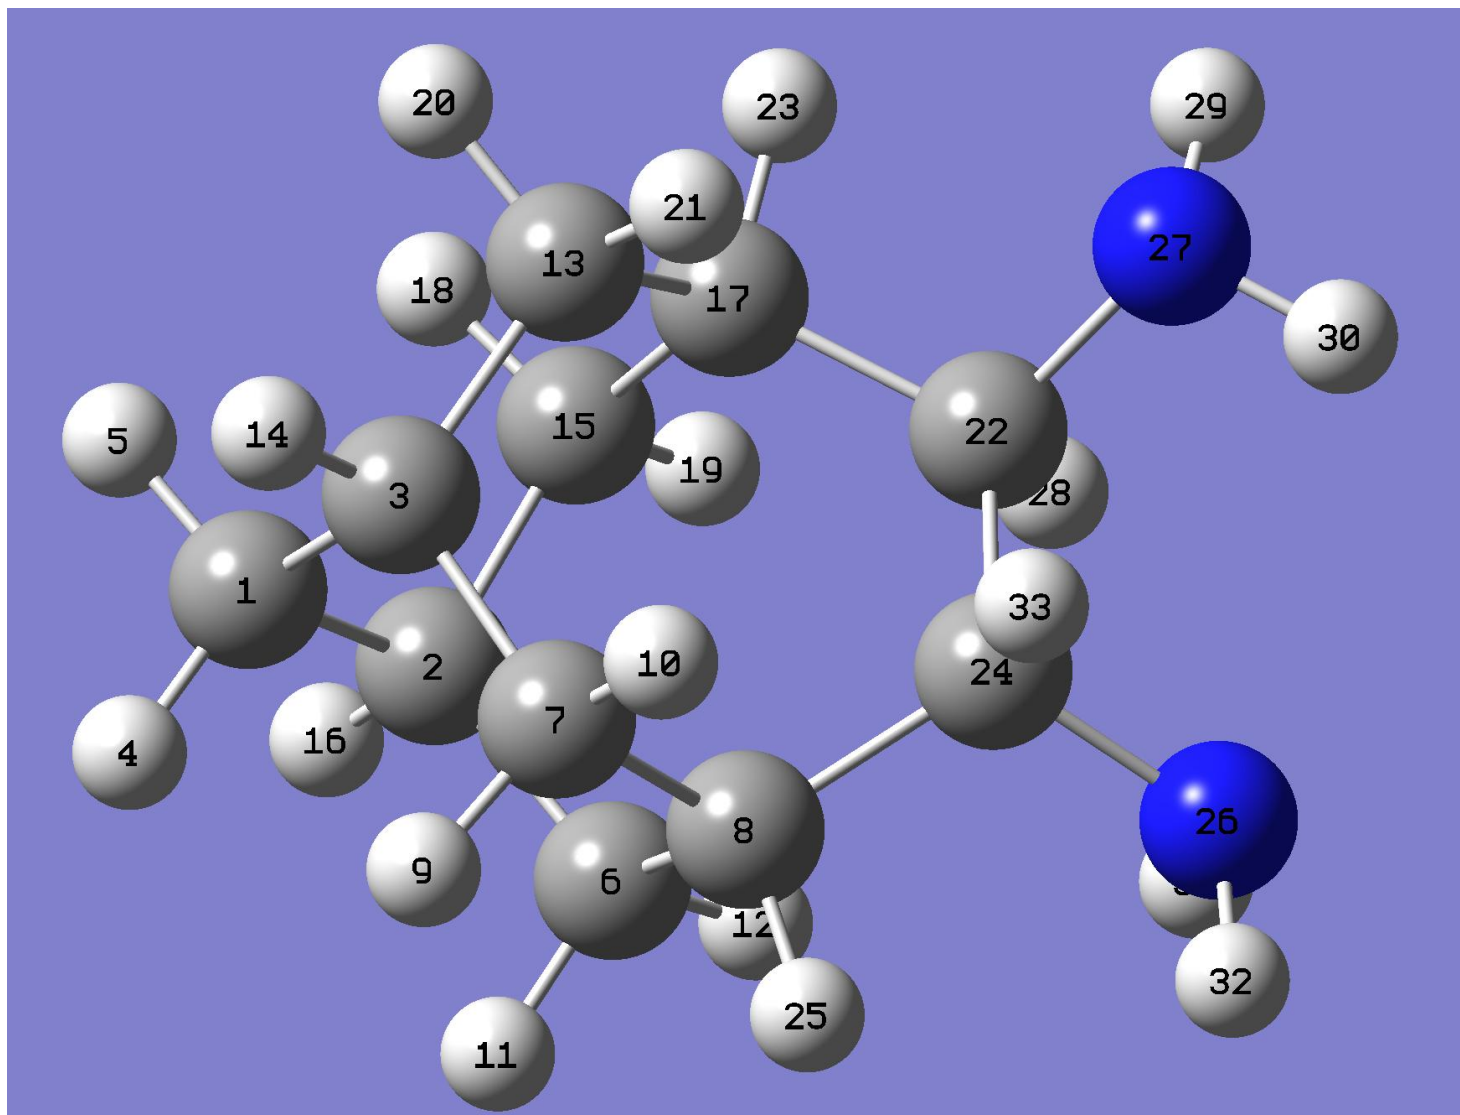

| Tag | Symbol | X          | Y          | Z          |
|-----|--------|------------|------------|------------|
| 1   | C      | 2.4696600  | -0.0094110 | 0.0133530  |
| 2   | C      | 1.5697870  | -0.2202060 | 1.2314500  |
| 3   | C      | 1.5920480  | 0.2126430  | -1.2188310 |
| 4   | H      | 3.1137520  | -0.8776080 | -0.1442100 |
| 5   | H      | 3.1215870  | 0.8507380  | 0.1819160  |
| 6   | C      | 0.6683940  | -1.4479120 | 1.0225800  |
| 7   | C      | 0.8072790  | -1.0705900 | -1.4792930 |
| 8   | C      | -0.1002580 | -1.4739250 | -0.3107610 |
| 9   | H      | 1.5243320  | -1.8748590 | -1.6622830 |
| 10  | H      | 0.2073400  | -0.9737920 | -2.3866400 |
| 11  | H      | 1.3056770  | -2.3345600 | 1.0578850  |
| 12  | H      | -0.0297390 | -1.5441640 | 1.8583440  |
| 13  | C      | 0.6974600  | 1.4470500  | -1.0258250 |
| 14  | H      | 2.2291790  | 0.4005560  | -2.0855590 |
| 15  | C      | 0.7952290  | 1.0726740  | 1.4773150  |
| 16  | H      | 2.1906010  | -0.4140100 | 2.1086660  |
| 17  | C      | -0.0915470 | 1.4796950  | 0.2947050  |
| 18  | H      | 1.5194960  | 1.8690540  | 1.6654120  |
| 19  | H      | 0.1839650  | 0.9873640  | 2.3782690  |
| 20  | H      | 1.3414660  | 2.3293100  | -1.0505870 |
| 21  | H      | 0.0093620  | 1.5467050  | -1.8673360 |
| 22  | C      | -1.4197180 | 0.7089920  | 0.2949800  |
| 23  | H      | -0.3834810 | 2.5193830  | 0.4624840  |
| 24  | C      | -1.4290120 | -0.6935610 | -0.3282330 |
| 25  | H      | -0.3962920 | -2.5108580 | -0.4869980 |
| 26  | N      | -2.5485570 | -1.4247950 | 0.2860570  |
| 27  | N      | -2.4489890 | 1.5050480  | -0.3901240 |
| 28  | H      | -1.6851400 | 0.5757080  | 1.3508250  |
| 29  | H      | -2.6374430 | 2.3505790  | 0.1352420  |
| 30  | H      | -3.3150790 | 0.9788420  | -0.4074340 |
| 31  | H      | -2.3714190 | -1.5476180 | 1.2773980  |
| 32  | H      | -2.6084440 | -2.3573910 | -0.1056460 |
| 33  | H      | -1.6928170 | -0.5678540 | -1.3799150 |

Coordinates of conformer 2\_18

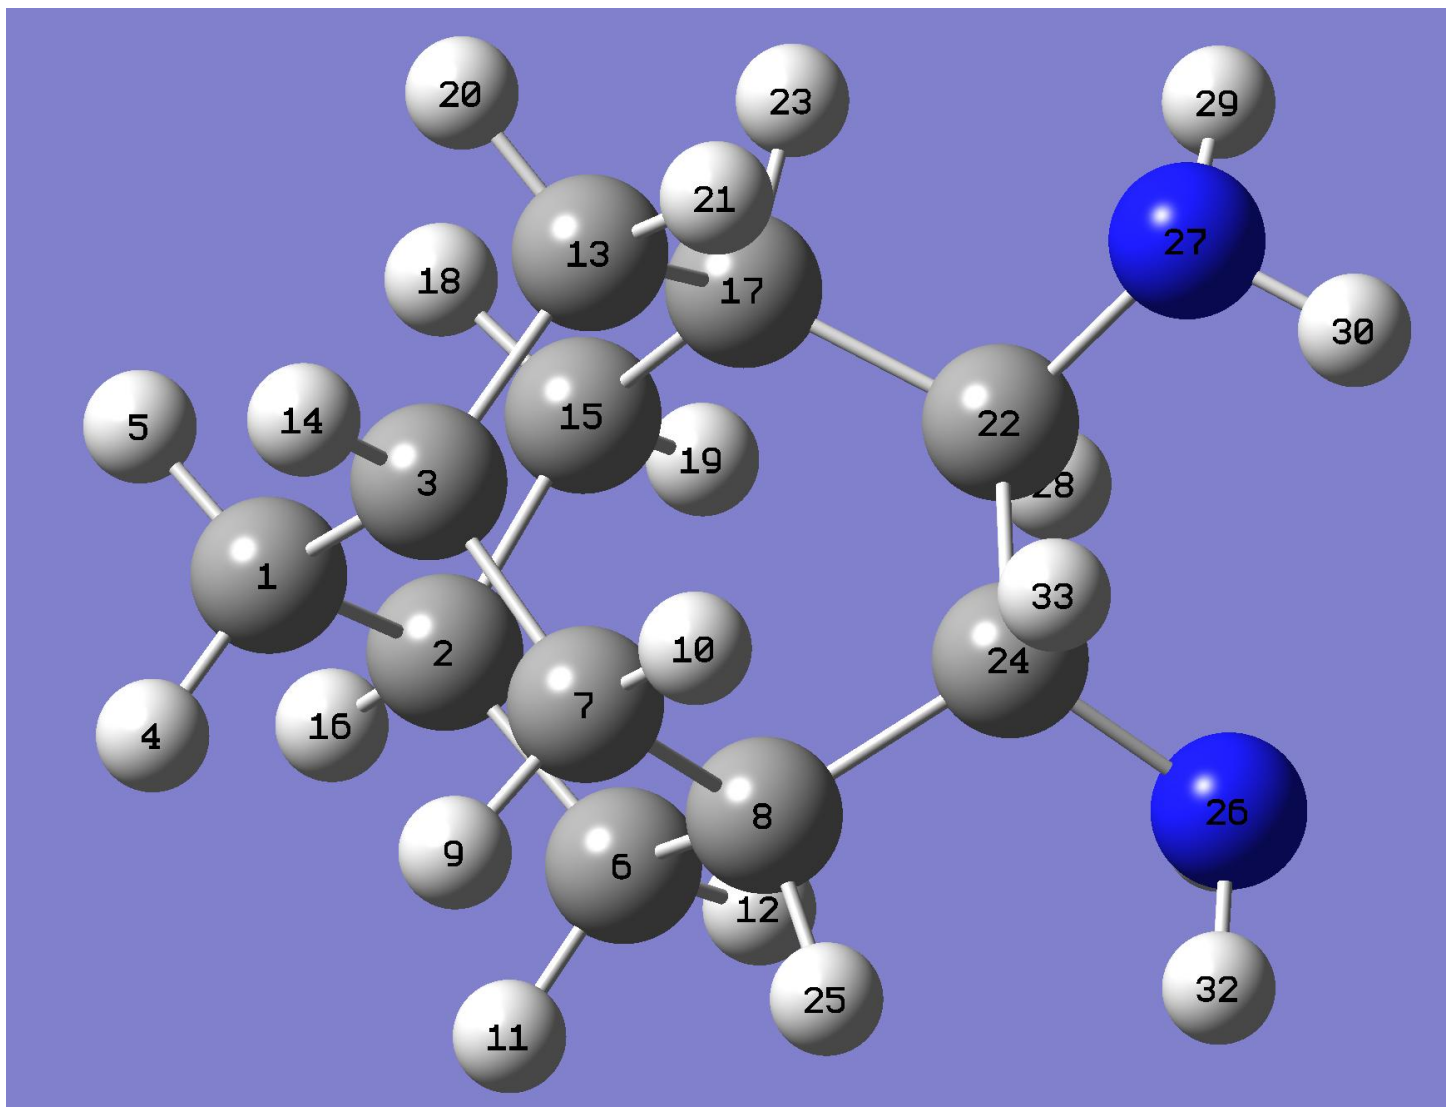

| Tag | Symbol | X          | Y          | Z          |
|-----|--------|------------|------------|------------|
| 1   | C      | -2.4693880 | 0.0016030  | 0.0217370  |
| 2   | C      | -1.5651190 | 0.2201710  | 1.2351400  |
| 3   | C      | -1.5963200 | -0.2222290 | -1.2133420 |
| 4   | H      | -3.1171570 | 0.8670360  | -0.1364370 |
| 5   | H      | -3.1176450 | -0.8601890 | 0.1964290  |
| 6   | C      | -0.6683010 | 1.4497540  | 1.0180090  |
| 7   | C      | -0.8168290 | 1.0623280  | -1.4819620 |
| 8   | C      | 0.0942120  | 1.4728340  | -0.3188440 |
| 9   | H      | -1.5369720 | 1.8639130  | -1.6647290 |
| 10  | H      | -0.2202100 | 0.9640340  | -2.3913730 |
| 11  | H      | -1.3081610 | 2.3346400  | 1.0528530  |
| 12  | H      | 0.0338840  | 1.5510550  | 1.8495840  |
| 13  | C      | -0.6961060 | -1.4523130 | -1.0196070 |
| 14  | H      | -2.2365840 | -0.4156800 | -2.0766340 |
| 15  | C      | -0.7849110 | -1.0689170 | 1.4824120  |
| 16  | H      | -2.1829850 | 0.4151150  | 2.1142780  |
| 17  | C      | 0.0985480  | -1.4761450 | 0.2975270  |
| 18  | H      | -1.5052060 | -1.8676840 | 1.6757820  |
| 19  | H      | -0.1704540 | -0.9783450 | 2.3807750  |
| 20  | H      | -1.3365200 | -2.3373860 | -1.0375660 |
| 21  | H      | -0.0113370 | -1.5528610 | -1.8638120 |
| 22  | C      | 1.4241380  | -0.7007660 | 0.2898880  |
| 23  | H      | 0.3965460  | -2.5138390 | 0.4678440  |
| 24  | C      | 1.4268990  | 0.6988020  | -0.3412950 |
| 25  | H      | 0.3833190  | 2.5109260  | -0.5020210 |
| 26  | N      | 2.5436450  | 1.4443800  | 0.2667630  |
| 27  | N      | 2.4529550  | -1.4999170 | -0.3930220 |
| 28  | H      | 1.6899480  | -0.5641340 | 1.3454950  |
| 29  | H      | 2.6473000  | -2.3403540 | 0.1383650  |
| 30  | H      | 3.3183380  | -0.9736300 | -0.4265650 |
| 31  | H      | 2.4840550  | 1.3750050  | 1.2768580  |
| 32  | H      | 2.4523700  | 2.4327830  | 0.0619370  |
| 33  | H      | 1.6803280  | 0.5676210  | -1.3952260 |

Coordinates of conformer 3\_15

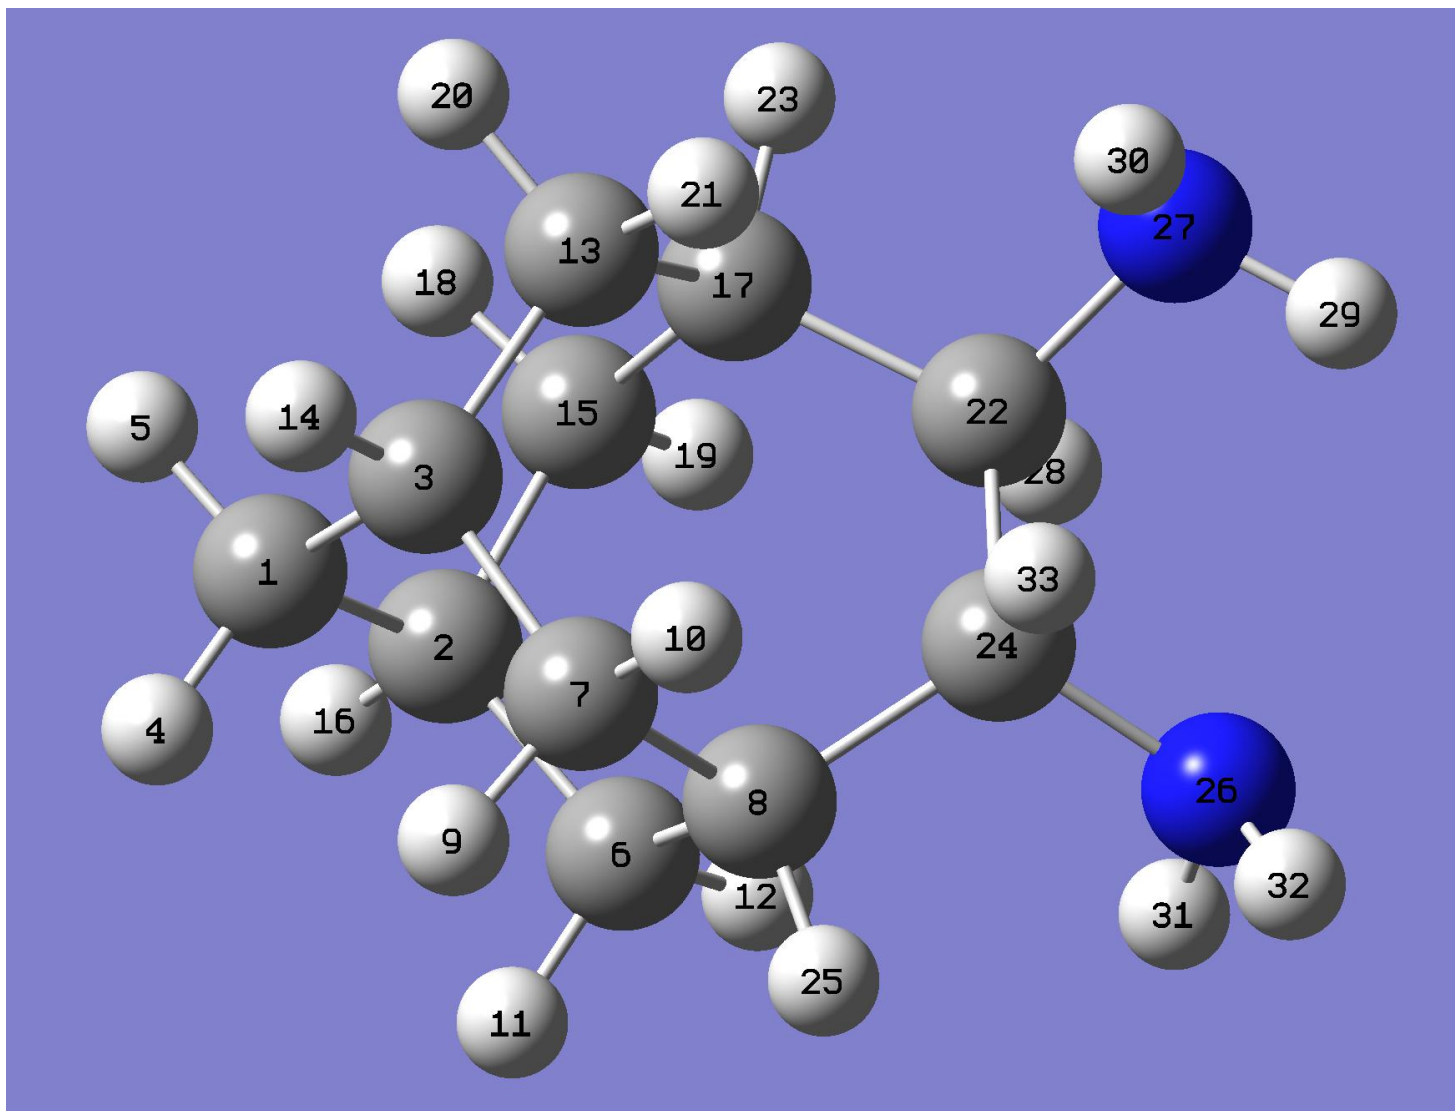

| Tag | Symbol | X          | Y          | Z          |
|-----|--------|------------|------------|------------|
| 1   | C      | 2.4701470  | 0.0348450  | 0.0189890  |
| 2   | C      | 1.5895200  | 0.2525910  | -1.2118650 |
| 3   | C      | 1.5733150  | -0.2119450 | 1.2325350  |
| 4   | H      | 3.1024160  | 0.9070360  | 0.2001320  |
| 5   | H      | 3.1335410  | -0.8164040 | -0.1494240 |
| 6   | C      | 0.6716030  | 1.4684050  | -1.0038650 |
| 7   | C      | 0.7726240  | 1.0613590  | 1.4938560  |
| 8   | C      | -0.1211470 | 1.4692130  | 0.3160030  |
| 9   | H      | 1.4805370  | 1.8692910  | 1.6951250  |
| 10  | H      | 0.1609480  | 0.9517400  | 2.3919900  |
| 11  | H      | 1.2998740  | 2.3620260  | -1.0162010 |
| 12  | H      | -0.0115630 | 1.5669130  | -1.8516760 |
| 13  | C      | 0.6973660  | -1.4550450 | 1.0072580  |
| 14  | H      | 2.1970520  | -0.4039930 | 2.1080000  |
| 15  | C      | 0.8355590  | -1.0460160 | -1.4879270 |
| 16  | H      | 2.2236050  | 0.4645230  | -2.0752120 |
| 17  | C      | -0.0685940 | -1.4851470 | -0.3292240 |
| 18  | H      | 1.5742930  | -1.8297750 | -1.6732060 |
| 19  | H      | 0.2395130  | -0.9579580 | -2.3984140 |
| 20  | H      | 1.3522590  | -2.3289480 | 1.0333200  |
| 21  | H      | 0.0018980  | -1.5746850 | 1.8420960  |
| 22  | C      | -1.4084020 | -0.7353820 | -0.3441190 |
| 23  | H      | -0.3417850 | -2.5244560 | -0.5157990 |
| 24  | C      | -1.4362170 | 0.6669860  | 0.2980290  |
| 25  | H      | -0.4346900 | 2.4991100  | 0.4995470  |
| 26  | N      | -2.5643560 | 1.3997430  | -0.2977320 |
| 27  | N      | -2.4670760 | -1.5915960 | 0.2116850  |
| 28  | H      | -1.6664040 | -0.5954890 | -1.3952030 |
| 29  | H      | -3.3401400 | -1.0758560 | 0.1948020  |
| 30  | H      | -2.2718370 | -1.7777060 | 1.1900730  |
| 31  | H      | -2.2726330 | 1.9127720  | -1.1206930 |
| 32  | H      | -2.9534210 | 2.0604140  | 0.3608340  |
| 33  | H      | -1.7080860 | 0.5152410  | 1.3442180  |

Coordinates of conformer 3\_16

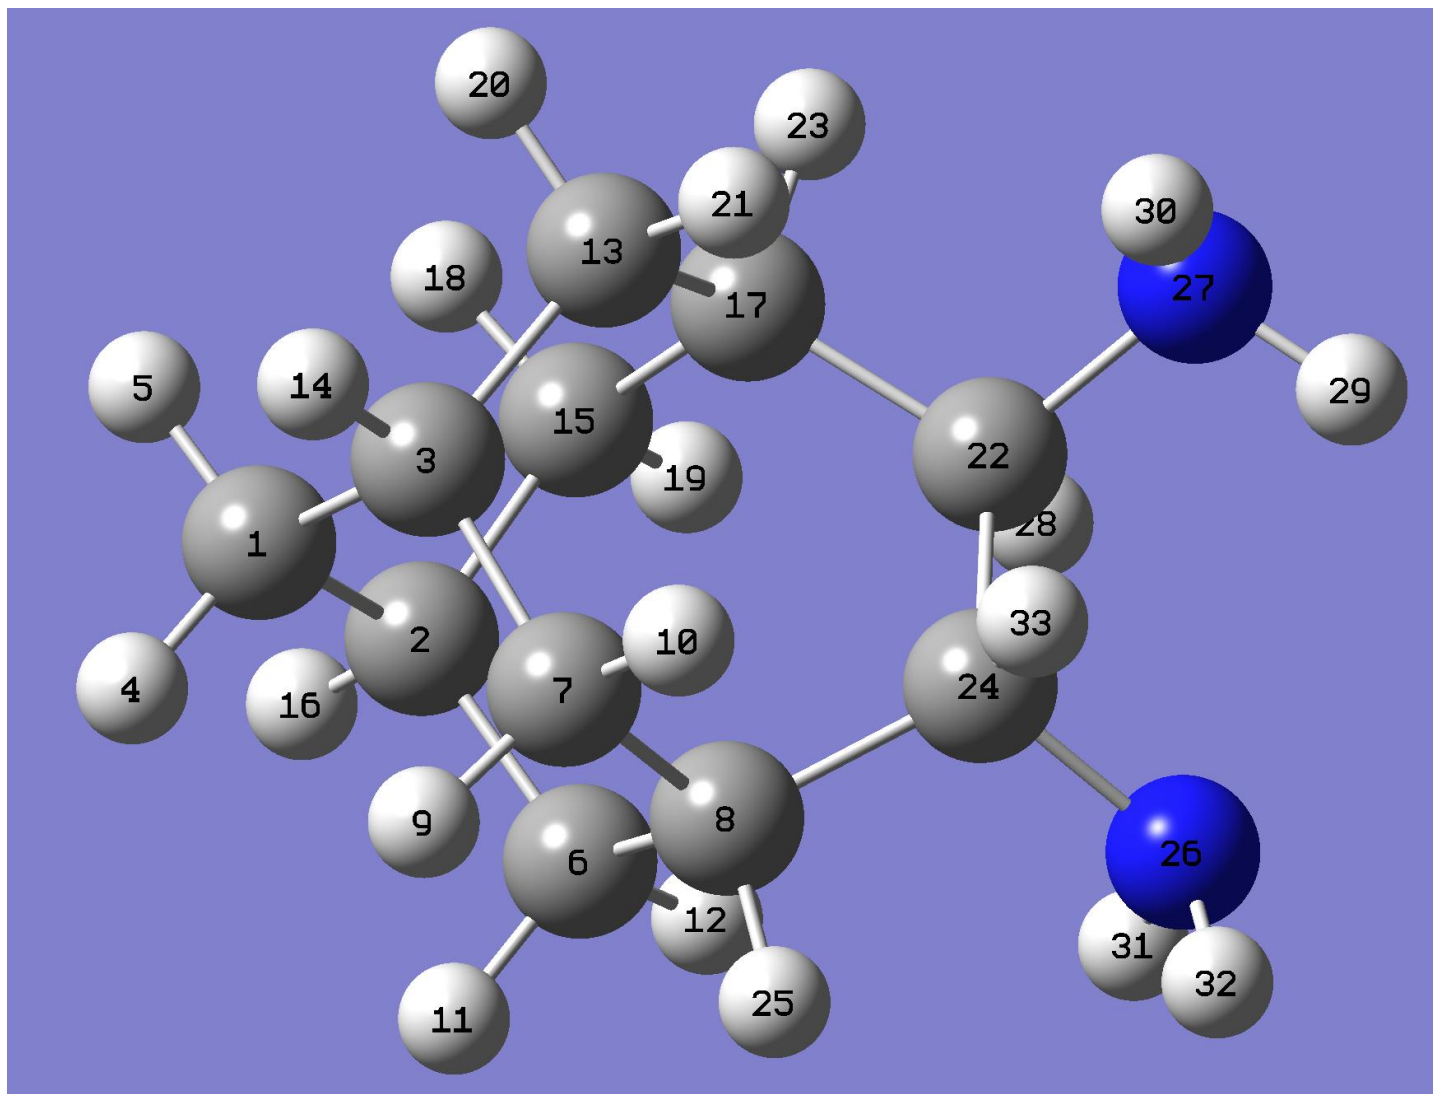

| Tag | Symbol | X          | Y          | Z          |
|-----|--------|------------|------------|------------|
| 1   | C      | 2.4691960  | 0.0249230  | 0.0111700  |
| 2   | C      | 1.5846800  | 0.2562930  | -1.2143900 |
| 3   | C      | 1.5762640  | -0.2271740 | 1.2264730  |
| 4   | H      | 3.1061530  | 0.8928460  | 0.1963450  |
| 5   | H      | 3.1280570  | -0.8280020 | -0.1664150 |
| 6   | C      | 0.6730100  | 1.4741430  | -0.9932420 |
| 7   | C      | 0.7816280  | 1.0471350  | 1.5011670  |
| 8   | C      | -0.1141880 | 1.4677970  | 0.3295240  |
| 9   | H      | 1.4930880  | 1.8505860  | 1.7077000  |
| 10  | H      | 0.1719940  | 0.9317440  | 2.4000430  |
| 11  | H      | 1.3045580  | 2.3654970  | -1.0017720 |
| 12  | H      | -0.0135960 | 1.5821780  | -1.8371670 |
| 13  | C      | 0.6937480  | -1.4643170 | 0.9949610  |
| 14  | H      | 2.2026600  | -0.4290380 | 2.0978170  |
| 15  | C      | 0.8224240  | -1.0358710 | -1.4973910 |
| 16  | H      | 2.2162750  | 0.4716480  | -2.0787130 |
| 17  | C      | -0.0785710 | -1.4793830 | -0.3380400 |
| 18  | H      | 1.5556230  | -1.8224770 | -1.6921790 |
| 19  | H      | 0.2228150  | -0.9372920 | -2.4044960 |
| 20  | H      | 1.3445170  | -2.3415360 | 1.0102400  |
| 21  | H      | 0.0018470  | -1.5878260 | 1.8321530  |
| 22  | C      | -1.4157580 | -0.7248100 | -0.3388780 |
| 23  | H      | -0.3579190 | -2.5157290 | -0.5319190 |
| 24  | C      | -1.4341960 | 0.6723870  | 0.3127720  |
| 25  | H      | -0.4221540 | 2.4980580  | 0.5220280  |
| 26  | N      | -2.5589470 | 1.4062660  | -0.2844930 |
| 27  | N      | -2.4724620 | -1.5839570 | 0.2174870  |
| 28  | H      | -1.6788370 | -0.5782060 | -1.3883180 |
| 29  | H      | -3.3406930 | -1.0601930 | 0.2297430  |
| 30  | H      | -2.2600910 | -1.7941600 | 1.1872930  |
| 31  | H      | -2.3127040 | 1.7369330  | -1.2106900 |
| 32  | H      | -2.7849350 | 2.2202340  | 0.2731390  |
| 33  | H      | -1.7061970 | 0.5218330  | 1.3594460  |

Coordinates of conformer 3\_17

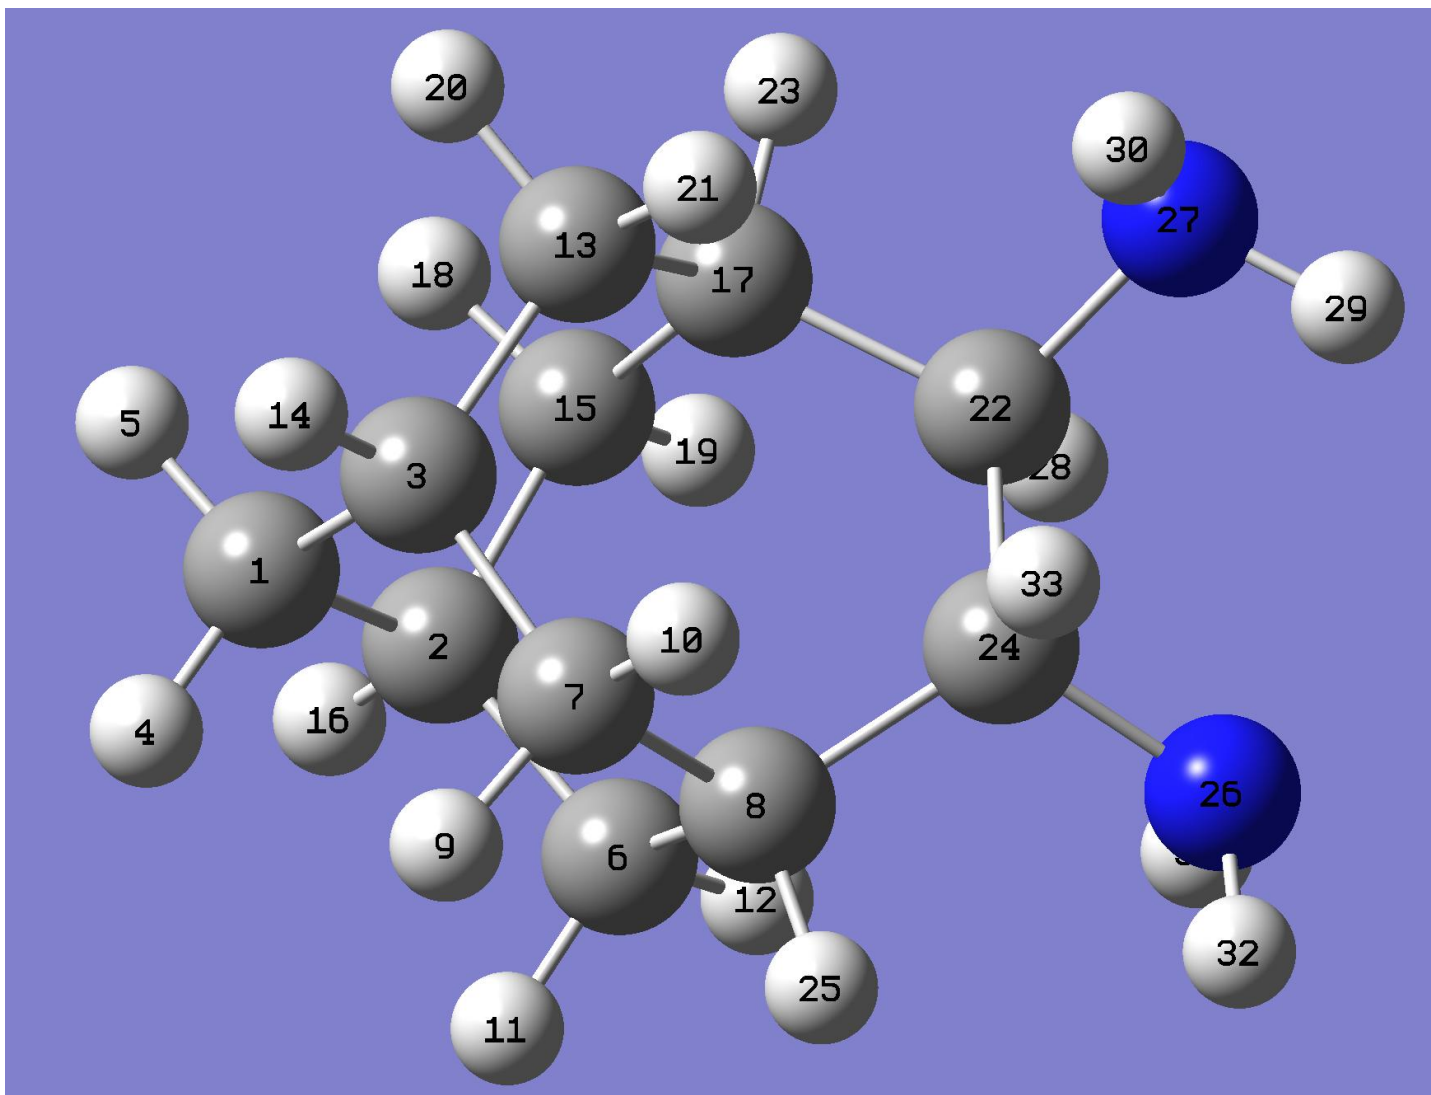

| Tag | Symbol | X          | Y          | Z          |
|-----|--------|------------|------------|------------|
| 1   | C      | -2.4681300 | 0.0149960  | -0.0007960 |
| 2   | C      | -1.5780750 | 0.2640310  | 1.2172720  |
| 3   | C      | -1.5809030 | -0.2471390 | -1.2181550 |
| 4   | H      | -3.1097510 | 0.8781350  | -0.1921630 |
| 5   | H      | -3.1224390 | -0.8386250 | 0.1899220  |
| 6   | C      | -0.6732060 | 1.4831400  | 0.9776590  |
| 7   | C      | -0.7918900 | 1.0263890  | -1.5115590 |
| 8   | C      | 0.1069970  | 1.4644590  | -0.3488040 |
| 9   | H      | -1.5066310 | 1.8249820  | -1.7253630 |
| 10  | H      | -0.1851840 | 0.9017400  | -2.4112100 |
| 11  | H      | -1.3084610 | 2.3718970  | 0.9794380  |
| 12  | H      | 0.0180230  | 1.6039460  | 1.8159450  |
| 13  | C      | -0.6919520 | -1.4776370 | -0.9776280 |
| 14  | H      | -2.2112400 | -0.4612740 | -2.0837080 |
| 15  | C      | -0.8072010 | -1.0207010 | 1.5101340  |
| 16  | H      | -2.2059580 | 0.4856710  | 2.0827150  |
| 17  | C      | 0.0889060  | -1.4725280 | 0.3502730  |
| 18  | H      | -1.5345970 | -1.8093090 | 1.7180120  |
| 19  | H      | -0.2027540 | -0.9087310 | 2.4124970  |
| 20  | H      | -1.3388110 | -2.3578730 | -0.9774020 |
| 21  | H      | -0.0051960 | -1.6084960 | -1.8178850 |
| 22  | C      | 1.4233430  | -0.7131820 | 0.3334660  |
| 23  | H      | 0.3751710  | -2.5049770 | 0.5546390  |
| 24  | C      | 1.4326900  | 0.6778010  | -0.3311870 |
| 25  | H      | 0.4074890  | 2.4945400  | -0.5555260 |
| 26  | N      | 2.5497870  | 1.4223650  | 0.2688490  |
| 27  | N      | 2.4774050  | -1.5776460 | -0.2217660 |
| 28  | H      | 1.6923670  | -0.5579050 | 1.3804630  |
| 29  | H      | 3.3440760  | -1.0526000 | -0.2568900 |
| 30  | H      | 2.2522620  | -1.8076890 | -1.1840340 |
| 31  | H      | 2.3725150  | 1.5650320  | 1.2574420  |
| 32  | H      | 2.6128740  | 2.3463710  | -0.1421820 |
| 33  | H      | 1.7024330  | 0.5243550  | -1.3783300 |

## References

1. Schlatmann, J. L. M. A.; Korsloot, J. G.; Schut, J. *Tetrahedron*, **1970**, 26, 949–954.
2. Nordlander, J. E.; Wu, F. Y. H.; Jindal, S. P.; Hamilton, J. B. *J. Am. Chem. Soc.*, **1969**, 91, 3962–3964.
3. Balode, D. E.; Ziemelis, K. M. USSR Patent SU 637404 A1, **1978**.
4. Stetter, H.; Löhr, V.; Simos, A. *Liebigs Ann. Chem.*, **1977**, 1977, 999–1004.
5. Sasaki, T.; Eguchi, S.; Hattori, S. *Heterocycles*, **1978**, 11, 235–242.
6. Avogadro: an open-source molecular builder and visualization tool. Version 1.21. <http://avogadro.cc/>
7. Frisch, M. J.; Trucks, G. W.; Schlegel, H. B.; Scuseria, G. E.; Robb, M. A.; Cheeseman, J. R.; Scalmani, G.; Barone, V.; Petersson, G. A.; Nakatsuji, H.; Li, X.; Caricato, M.; Marenich, A. V.; Bloino, J.; Janesko, B. G.; Gomperts, R.; Mennucci, B.; Hratchian, H. P.; Ortiz, J. V.; Izmaylov, A. F.; Sonnenberg, J. L.; Williams-Young, D.; Ding, F.; Lipparini, F.; Egidi, F.; Goings, J.; Peng, B.; Petrone, A.; Henderson, T.; Ranasinghe, D.; Zakrzewski, V. G.; Gao, J.; Rega, N.; Zheng, G.; Liang, W.; Hada, M.; Ehara, M.; Toyota, K.; Fukuda, R.; Hasegawa, J.; Ishida, T.; Nakajima, Y.; Honda, Y.; Kitao, O.; Nakai, H.; Vreven, T.; Throssell, K.; Montgomery, J. A., Jr.; Peralta, J. E.; Ogliaro, F.; Bearpark, M. J.; Heyd, J. J.; Brothers, E. N.; Kudin, K. N.; Staroverov, V. N.; Keith, T. A.; Kobayashi, R.; Normand, J.; Raghavachari, K.; Rendell, A. P.; Burant, J. C.; Iyengar, S. S.; Tomasi, J.; Cossi, M.; Millam, J. M.; Klene, M.; Adamo, C.; Cammi, R.; Ochterski, J. W.; Martin, R. L.; Morokuma, O.; Farkas, J. B.; Foresman, J. B.; Fox, D. J. *Gaussian 09*, Revision A.02; Gaussian, Inc.: Wallingford CT, **2016**.
